# Supplementary material for: Zinc N,N-bis(2-picolyl)amine Chelates Show Substitution-Dependent Cleavage of Phosphodiesters in Models as Well as of PNAzyme-RNA Bulges
Source: MDPI journal article supplement (doi:10.3390/molecules29092123), 2024-05-03

**Zinc *N,N*-bis(2-picolyl)amine Chelates Show Substitution-Dependent Cleavage of Phosphodiesters in Models as Well as of PNAzyme-RNA Bulges**

Supporting Information

## Contents

|                                                                                                              |    |
|--------------------------------------------------------------------------------------------------------------|----|
| <b>Synthesis</b> .....                                                                                       | 4  |
| (6-Methylpyridin-2-yl)methyl methanesulfonate .....                                                          | 4  |
| 2-(Iodomethyl)-6-methylpyridine .....                                                                        | 4  |
| Diethyl pyridine-2,6-dicarboxylate <b>3</b> .....                                                            | 4  |
| 6-(Ethoxycarbonyl)picolinic acid <b>4</b> .....                                                              | 5  |
| Ethyl 6-((tert-butoxycarbonyl)amino)picolinate <b>5</b> .....                                                | 5  |
| Tert-butyl (6-(hydroxymethyl)pyridin-2-yl)carbamate <b>1</b> .....                                           | 5  |
| (6-((Tert-butoxycarbonyl)amino)pyridin-2-yl)methyl methanesulfonate <b>6</b> .....                           | 6  |
| Tert-butyl (6-(iodomethyl)pyridin-2-yl)carbamate <b>7</b> .....                                              | 6  |
| Methyl 4-(aminomethyl)benzoate hydrochloride <b>8</b> .....                                                  | 7  |
| Methyl 4-((bis(pyridin-2-ylmethyl)amino)methyl)benzoate .....                                                | 7  |
| Methyl 4-((bis((6-methylpyridin-2-yl)methyl)amino)methyl)benzoate .....                                      | 7  |
| Methyl 4-((bis((6-((tert-butoxycarbonyl)amino)pyridin-2-yl)methyl)amino)methyl)-benzoate <b>8</b> .....      | 8  |
| 4-((Bis(pyridin-2-ylmethyl)amino)methyl)benzoic acid <b>9</b> .....                                          | 8  |
| 4-((Bis((6-methylpyridin-2-yl)methyl)amino)methyl)benzoic acid <b>10</b> .....                               | 9  |
| 4-((Bis((6-((tert-butoxycarbonyl)amino)pyridin-2-yl)methyl)amino)methyl)benzoic acid <b>11</b> ..            | 9  |
| 4-((Bis(pyridin-2-ylmethyl)amino)methyl)-N-methylbenzamide <b>12</b> .....                                   | 10 |
| 4-((Bis((6-methylpyridin-2-yl)methyl)amino)methyl)-N-methylbenzamide <b>13</b> .....                         | 10 |
| Di-tert-butyl (((4-(methylcarbamoyl)benzyl)azanediyl)bis(methylene))bis(pyridine-6,2-diyl))dicarbamate ..... | 11 |
| 4-((Bis((6-aminopyridin-2-yl)methyl)amino)methyl)-N-methylbenzamide <b>14</b> .....                          | 11 |
| (6-Methylpyridin-2-yl)methyl methanesulfonate .....                                                          | 12 |
| 2-(Iodomethyl)-6-methylpyridine .....                                                                        | 13 |
| Diethyl pyridine-2,6-dicarboxylate <b>3</b> .....                                                            | 14 |
| 6-(Ethoxycarbonyl)picolinic acid <b>4</b> .....                                                              | 15 |
| Ethyl 6-((tert-butoxycarbonyl)amino)picolinate <b>5</b> .....                                                | 16 |
| Tert-butyl (6-(hydroxymethyl)pyridin-2-yl)carbamate <b>1</b> .....                                           | 17 |
| (6-((Tert-butoxycarbonyl)amino)pyridin-2-yl)methyl methanesulfonate <b>6</b> .....                           | 18 |
| Tert-butyl (6-(iodomethyl)pyridin-2-yl)carbamate <b>7</b> .....                                              | 19 |
| Methyl 4-(aminomethyl)benzoate hydrochloride <b>8</b> .....                                                  | 20 |
| Methyl 4-((bis(pyridin-2-ylmethyl)amino)methyl)benzoate .....                                                | 21 |
| Methyl 4-((bis((6-methylpyridin-2-yl)methyl)amino)methyl)benzoate .....                                      | 22 |
| Methyl 4-((bis((6-((tert-butoxycarbonyl)amino)pyridin-2-yl)methyl)amino)methyl)-benzoate .....               | 23 |
| 4-((bis(pyridin-2-ylmethyl)amino)methyl)benzoic acid <b>9</b> .....                                          | 24 |
| 4-((bis((6-methylpyridin-2-yl)methyl)amino)methyl)benzoic acid <b>10</b> .....                               | 25 |
| 4-((bis(pyridin-2-ylmethyl)amino)methyl)-N-methylbenzamide <b>12</b> .....                                   | 27 |

|                                                                                                                  |    |
|------------------------------------------------------------------------------------------------------------------|----|
| 4-((bis((6-methylpyridin-2-yl)methyl)amino)methyl)-N-methylbenzamide <b>13</b> .....                             | 28 |
| di-tert-butyl (((4-(methylcarbamoyl)benzyl)azanediyl)bis(methylene))bis(pyridine-6,2-diyl))dicarbamate .....     | 29 |
| 4-((bis((6-aminopyridin-2-yl)methyl)amino)methyl)-N-methylbenzamide <b>14</b> .....                              | 30 |
| <b>Metal complex formation</b> .....                                                                             | 31 |
| 4-((bis(pyridin-2-ylmethyl)amino)methyl)-N-methylbenzamide <b>12</b> · ZnCl <sub>2</sub> Complex.....            | 31 |
| 4-((bis((6-methylpyridin-2-yl)methyl)amino)methyl)-N-methylbenzamide <b>13</b> · ZnCl <sub>2</sub> Complex ..... | 31 |
| 4-((bis((6-aminopyridin-2-yl)methyl)amino)methyl)-N-methylbenzamide <b>14</b> · ZnCl <sub>2</sub> Complex .....  | 31 |
| <b>Synthesis of PNA conjugates</b> .....                                                                         | 31 |
| <b>Titration experiments</b> .....                                                                               | 34 |
| <b>Speciation Curves</b> .....                                                                                   | 35 |
| <b>The reaction of HPNPP</b> .....                                                                               | 36 |
| <b>The reaction of PNAzymes</b> .....                                                                            | 36 |

## Synthesis

### (6-Methylpyridin-2-yl)methyl methanesulfonate

(6-methylpyridin-2-yl)methanol (3.00 g; 24.4 mmol) was dissolved in THF (40 ml) and cooled on an ice bath. Et<sub>3</sub>N (2.96 g; 29.3 mmol) was added followed by methanesulfonyl chloride (3.21 g; 28.0 mmol). The reaction was left to stir overnight. The reaction mixture was poured into aqueous NH<sub>4</sub>Cl (sat) (150 ml) and extracted with diethyl ether (3x50 ml). The combined ether phase was dried over MgSO<sub>4</sub>, filtered and evaporated *in vacuo* giving an orange oil. Yield: 4.64 g (95%)

<sup>1</sup>H NMR (400 MHz, CDCl<sub>3</sub>) δ 7.66 (t, J = 7.7 Hz, 1H), 7.29 (d, J = 7.7 Hz, 1H), 7.17 (d, J = 7.7 Hz, 1H), 5.31 (s, 2H), 3.10 (s, 3H), 2.57 (s, 3H). <sup>13</sup>C NMR (101 MHz, CDCl<sub>3</sub>) δ 158.6, 152.8, 137.5, 123.5, 119.6, 71.9, 38.2, 24.4. HRMS (ESI): m/z [M+H]<sup>+</sup> calcd. for [C<sub>8</sub>H<sub>11</sub>NO<sub>3</sub>S +H<sup>+</sup>]: 202.0532; found: 202.0532 100 FT-IR (Vmax/cm<sup>-1</sup>): 3383(w), 3023(w), 2932(w), 1596(m), 1577(w), 1460(m), 1347(s), 1334(s), 1171(s), 1028(m), 966(s), 945(s)

### 2-(Iodomethyl)-6-methylpyridine

(6-methylpyridin-2-yl)methyl methanesulfonate (2.00 g; 9.94 mmol) was dissolved in THF (30 ml) and LiI (2.86 g; 21.4 mmol) was added. The reaction was heated to 50°C for 90 min. The THF solution was poured into aqueous NH<sub>4</sub>Cl (sat.) (100 ml) and extracted with chloroform (3x50 ml). The combined organic phase was washed with Na<sub>2</sub>S<sub>2</sub>O<sub>3</sub> (10% W/W solution) (50 ml) and dried over MgSO<sub>4</sub>, filtered and evaporated *in vacuo*, giving an orange oil. Yield: 2.24 g (97%)

<sup>1</sup>H NMR (400 MHz, CDCl<sub>3</sub>) δ 7.50 (t, J = 7.7 Hz, 1H), 7.19 (d, J = 7.7 Hz, 1H), 6.99 (d, J = 7.7 Hz, 1H), 4.46 (s, 2H), 2.52 (s, 3H). <sup>13</sup>C NMR (101 MHz, CDCl<sub>3</sub>) δ 158.4, 157.6, 137.3, 122.3, 120.0, 24.6, 6.8. HRMS (ESI): m/z [M+H]<sup>+</sup> calcd. for [C<sub>7</sub>H<sub>8</sub>IN +H<sup>+</sup>]: 233.9774; found: 233.9771 FT-IR (Vmax/cm<sup>-1</sup>): 3230(w), 2966(w), 2924(w), 2870(w), 1591(s), 1575(s), 1452(s), 1159(s), 1035(m), 989(m), 790(m)

### Diethyl pyridine-2,6-dicarboxylate **3**

Pyridine-2,6-dicarboxylic acid (30.00 g; 179.5 mmol) was taken up in EtOH (200 ml). A catalytic amount of conc. H<sub>2</sub>SO<sub>4</sub> (95%) (2 ml) was added and the mixture was refluxed for 24 h. The ethanol phase was concentrated *in vacuo* and NaHCO<sub>3</sub> (sat.) (200 ml) was added. The aqueous phase was extracted with CHCl<sub>3</sub> (2x200 ml) and the combined organic phase was dried over MgSO<sub>4</sub>, filtered and evaporated *in vacuo* giving a colourless oil which crystallised giving a colourless crystalline solid. Yield: 30.83 g (77%), Mp: 40-42 °C

<sup>1</sup>H NMR (400 MHz, CDCl<sub>3</sub>) δ 8.23 (d, J = 7.8 Hz, 2H), 7.96 (t, J = 7.8 Hz, 1H), 4.43 (q, J = 7.1 Hz, 4H), 1.40 (t, J = 7.1 Hz, 6H). <sup>13</sup>C NMR (101 MHz, CDCl<sub>3</sub>) δ 164.6, 148.6, 138.3, 127.8, 62.3, 14.2. HRMS (ESI): m/z [M+H]<sup>+</sup> calcd. for [C<sub>11</sub>H<sub>13</sub>NO<sub>4</sub> +H<sup>+</sup>]: 224.0917; found: 224.0921 FT-IR (Vmax/cm<sup>-1</sup>): 3100(w), 3062(w), 2985(m), 2944(w), 2907(w), 1742(vs), 1238(vs)

#### 6-(Ethoxycarbonyl)picolinic acid **4**

Diethyl pyridine-2,6-dicarboxylate **3** (30.22 g; 135.4 mmol) was dissolved in a mixture of EtOH (50 ml) and dioxane (400 ml). NaOH (5.42 g; 135.5 mmol; 1 eq) was dissolved in EtOH (150 ml) and added to the first solution. The combined mixture was heated to 100 °C for 5 h. The solvent was removed *in vacuo* and the residue was taken up in water (400 ml). The aqueous phase was washed with CHCl<sub>3</sub> (3x100 ml) before the pH was lowered to pH 1 with conc. HCl. The aqueous phase was then extracted with CHCl<sub>3</sub> (4x150 ml) and the combined organic phase was dried over MgSO<sub>4</sub>, filtered and evaporated *in vacuo* giving a white solid. Yield: 15.07 g (57%). Mp: 120-122 °C

<sup>1</sup>H NMR (400 MHz, CDCl<sub>3</sub>) δ 10.25 (s, 1H), 8.39 (dd, J = 7.7, 1.1 Hz, 1H), 8.35 (dd, J = 7.8, 1.1 Hz, 1H), 8.11 (t, J = 7.8 Hz, 1H), 4.48 (q, J = 7.1 Hz, 2H), 1.44 (t, J = 7.1 Hz, 3H). <sup>13</sup>C NMR (101 MHz, CDCl<sub>3</sub>) δ 163.8, 147.2, 146.5, 139.7, 128.9, 126.8, 62.6, 14.3. HRMS (ESI): m/z [M+H]<sup>+</sup> calcd. for [C<sub>9</sub>H<sub>9</sub>NO<sub>4</sub> +H<sup>+</sup>]: 196.0604; found: 196.0603 FT-IR (Vmax/cm<sup>-1</sup>): 3064(w), 2987(w), 2816(w), 2675(w), 2548(w), 1737(vs), 1698(vs), 1575(s), 1245(vs), 1151(s), 1023(m), 759(s), 709(s), 694(s), 650(s)

#### Ethyl 6-((tert-butoxycarbonyl)amino)picolinate **5**

6-(Ethoxycarbonyl)picolinic acid **4** (7.00 g; 35.9 mmol) was dissolved in toluene (150 ml) and Et<sub>3</sub>N (9.80 ml; 70.7 mmol) was added. Diphenylphosphoryl azide (11.42 g; 41.5 mmol) was added and the reaction was stirred at RT for 10 min before t-BuOH (15 ml; 157 mmol) was added. The reaction mixture was heated to 100 °C for 24 h. The reaction was allowed to cool down to RT and EtOAc (200 ml) was added. The organic phase was washed with NaHCO<sub>3</sub> (sat.) (2x100 ml) and NaCl (sat.) (100 ml). The organic phase was dried over MgSO<sub>4</sub>, filtered and evaporated *in vacuo* giving a dark brown oil which was purified by column chromatography (Eluent: EtOAc/Hex, 20:80) to give a clear colourless oil. Yield 6.35 g, (66%).

<sup>1</sup>H NMR (400 MHz, CDCl<sub>3</sub>) δ 8.13 (dd, J = 7.2, 1.9 Hz, 1H), 7.82 – 7.74 (m, 2H), 7.64 (s, 1H), 4.43 (q, J = 7.1 Hz, 2H), 1.49 (s, 9H), 1.40 (t, J = 7.1 Hz, 3H). <sup>13</sup>C NMR (101 MHz, CDCl<sub>3</sub>) δ 164.9, 152.4, 152.0, 139.2, 120.0, 116.1, 81.4, 62.0, 28.3, 14.4. HRMS (ESI): m/z [M+H]<sup>+</sup> calcd. for [C<sub>13</sub>H<sub>18</sub>N<sub>2</sub>O<sub>4</sub> +H<sup>+</sup>]: 267.1339; found: 267.1351

#### Tert-butyl (6-(hydroxymethyl)pyridin-2-yl)carbamate **1**

Ethyl 6-((tert-butoxycarbonyl)amino)picolinate **5** (9.63 g; 36.2 mmol) was taken up in EtOH (150 ml) and CaCl<sub>2</sub> (8.03 g; 72.4 mmol) was added. The suspension was cooled to 0 °C and NaBH<sub>4</sub> (6.84 g; 181 mmol) was added. The mixture was stirred for 5 h and allowed to rise to RT. The reaction mixture was concentrated *in vacuo* and water (500 ml) was added. The aqueous phase was extracted with CHCl<sub>3</sub> (4x100 ml). The organic layer was dried over MgSO<sub>4</sub>, filtered and evaporated *in vacuo* giving a yellow oil. The residue was purified by column chromatography (Eluent: EtOAc/Hex, 1:2) giving a colourless oil. Yield: 6.87 g (78%)

<sup>1</sup>H NMR (400 MHz, CDCl<sub>3</sub>) δ 7.82 (d, J = 8.3 Hz, 1H), 7.65 (dd, J = 8.1, 7.6 Hz, 1H), 7.49 (s, 1H), 6.90 (d, J = 7.4 Hz, 1H), 4.64 (s, 2H), 1.52 (s, 9H) <sup>13</sup>C NMR (101 MHz, CDCl<sub>3</sub>) δ 157.5, 152.3, 151.2, 139.2, 115.1, 110.8, 81.4, 63.9, 28.4. HRMS (ESI): m/z [M+H]<sup>+</sup> calcd. for [C<sub>11</sub>H<sub>16</sub>N<sub>2</sub>O<sub>3</sub> +H<sup>+</sup>]: 225.1234; found: 225.1231 FT-IR (Vmax/cm<sup>-1</sup>): 3222(w), 2980(w), 2934(w), 1727(s), 1582(m), 1522(s), 1457(s), 1367(m), 1225(s), 1149(vs), 1083(s), 878(m), 792(m)

(6-((Tert-butoxycarbonyl)amino)pyridin-2-yl)methyl methanesulfonate **6**

Tert-butyl (6-(hydroxymethyl)pyridin-2-yl)carbamate **1** (2.00 g; 8.96 mmol) was dissolved in EtOAc (50 ml) and Et<sub>3</sub>N (2.27 g; 22.4 mmol) was added. The mixture was cooled on an ice bath and MsCl (2.57 g; 22.4 mmol) was added. The reaction was stirred at RT for 2 h. The solution was poured out in NaHCO<sub>3</sub> (sat.) (100 ml) and the organic phase was separated and washed with additional NaHCO<sub>3</sub> (sat.) (100 ml), water (2x100 ml) and NaCl (sat.) (50 ml). The organic phase was dried over MgSO<sub>4</sub>, filtered and evaporated *in vacuo* giving a colourless oil. Yield: 2.60 g (96%)

<sup>1</sup>H NMR (400 MHz, CDCl<sub>3</sub>) δ 7.92 (d, J = 8.4 Hz, 1H), 7.70 (t, J = 7.9 Hz, 1H), 7.58 (s, 1H), 7.08 (d, J = 7.4 Hz, 1H), 5.17 (s, 2H), 3.03 (s, 3H), 1.50 (s, 9H). <sup>13</sup>C NMR (101 MHz, CDCl<sub>3</sub>) δ 152.3, 151.9, 151.7, 139.4, 117.1, 112.4, 81.4, 71.2, 38.2, 28.3 HRMS (ESI): m/z [M+H]<sup>+</sup> calcd. for [C<sub>12</sub>H<sub>18</sub>N<sub>2</sub>O<sub>5</sub>S+H<sup>+</sup>]: 303.1009; found: 303.1014; m/z [M+Na]<sup>+</sup> calcd. for [C<sub>12</sub>H<sub>18</sub>N<sub>2</sub>O<sub>5</sub>S+Na<sup>+</sup>]: 325.0829; found: 325.0833 FT-IR (Vmax/cm<sup>-1</sup>): 3222(w), 2980(w), 2938(w), 1727(s), 1582(m), 1522(m), 1463(m), 1354(s), 1223(m), 1168(s), 1152(s), 1083(m), 955(s), 800(m)

Tert-butyl (6-(iodomethyl)pyridin-2-yl)carbamate **7**

(6-((Tert-butoxycarbonyl)amino)pyridin-2-yl)methyl methanesulfonate **6** (2.48 g; 8.20 mmol) was dissolved in THF (75 ml) and NaI (2.46 g; 16.4 mmol) was added. The reaction mixture was heated to 50 °C and stirred for 90 min. The reaction mixture was allowed to cool to RT and poured into aqueous NH<sub>4</sub>Cl (sat.) (50 ml) and extracted with CHCl<sub>3</sub> (2x40 ml). The combined organic phase was washed with Na<sub>2</sub>S<sub>2</sub>O<sub>3</sub> (aq) (10w/w%) (25 ml) and the combined organic phase was dried over MgSO<sub>4</sub>, filtered and evaporated *in vacuo* to give a yellow oil. Yield: 2.28 g (83%)

<sup>1</sup>H NMR (400 MHz, CDCl<sub>3</sub>) δ 7.79 (d, J = 8.4 Hz, 1H), 7.57 (t, J = 7.9 Hz, 1H), 7.51 (s, 1H), 7.00 (d, J = 7.4 Hz, 1H), 4.36 (s, 2H), 1.49 (s, 9H). <sup>13</sup>C NMR (101 MHz, CDCl<sub>3</sub>) δ 156.4, 152.3, 151.7, 139.2, 117.3, 111.3, 81.1, 28.3, 6.1. HRMS (ESI): m/z [M+H]<sup>+</sup> calcd. for [C<sub>11</sub>H<sub>15</sub>IN<sub>2</sub>O<sub>2</sub> +H<sup>+</sup>]: 335.0251; found: 335.0252; m/z [M+Na]<sup>+</sup> calcd. for [C<sub>11</sub>H<sub>15</sub>IN<sub>2</sub>O<sub>2</sub> +Na<sup>+</sup>]: 357.0070; found: 357.0076 FT-IR (Vmax/cm<sup>-1</sup>): 3226(w), 2980(w), 2934(w), 1727(s), 1580(s), 1517(s), 1452(s), 1402(m), 1365(m), 1279(m), 1223(m), 1149(s), 986(m), 886(m), 796(m)

## Methyl 4-(aminomethyl)benzoate hydrochloride **8**

4-(Aminomethyl)benzoic acid (1.20 g; 7.93 mmol) was suspended in methanol (90 ml) and thionyl chloride (9.0 ml; 124 mmol) was added dropwise. The solution was allowed to cool to RT and the flask was equipped with a stopper and left to stir overnight. The methanolic solution was evaporated *in vacuo* and the white salt was triturated in diethyl ether. The ether phase was decanted off and the white salt was dried *in vacuo*. Yield: 1.53 g (96%) mp: 234-236 °C

<sup>1</sup>H NMR (400 MHz, DMSO) δ 8.72 (s, 3H), 7.97 (d, J = 8.3 Hz, 2H), 7.66 (d, J = 8.4 Hz, 2H), 4.09 (s, 2H), 3.86 (s, 3H). <sup>13</sup>C NMR (101 MHz, DMSO) δ 165.9, 139.5, 129.5, 129.2, 129.2, 52.3, 41.7. HRMS (ESI): m/z [M+H]<sup>+</sup> calcd. for [C<sub>9</sub>H<sub>11</sub>NO<sub>2</sub> +H<sup>+</sup>]: 166.0863; found: 166.0869 FT-IR (Vmax/cm<sup>-1</sup>): 3005(s,Br), 2961(s,Br), 2881(s,Br), 1720(vs), 1597(w), 1478(m), 1466(m), 1436(m), 1381(w), 1315(w), 1281(vs), 1190(m), 1117(s), 1110(s), 1077(m), 963(m), 854(m), 863(m), 854(m), 835(m), 763(s), 703(s), 625(m), 532(m)

## Methyl 4-((bis(pyridin-2-ylmethyl)amino)methyl)benzoate

2-(Bromomethyl)pyridine hydrobromide (0.56 g; 2.2 mmol) and methyl 4-(aminomethyl)benzoate hydrochloride (0.20 g; 0.99 mmol) was added to a flame dried flask and the flask was equipped with a rubber septum. The atmosphere was changed to argon and DMF (dry) (10 ml) was added via a syringe. DIPEA (0.71 g; 5.5 mmol) was added and the flask was equipped with an argon balloon. The stirred reaction mixture was heated to 70 °C overnight. The reaction mixture was poured into water (75 ml) and extracted with diethyl ether (3x30 ml). The combined ether phase was dried over MgSO<sub>4</sub>, filtered and evaporated *in vacuo*. The residue was purified by column chromatography (Eluent: EtOAc/EtOH, 9:1; Rf: tailing) giving a yellow oil. Yield: 0.24 g (71%)

<sup>1</sup>H NMR (400 MHz, CDCl<sub>3</sub>) δ 8.50 (ddd, J = 5.0, 1.7, 1.0 Hz, 2H), 7.97 (d, J = 8.3 Hz, 2H), 7.65 (td, J = 7.7, 1.7 Hz, 2H), 7.54 (d, J = 7.8 Hz, 2H), 7.48 (d, J = 8.2 Hz, 2H), 7.13 (ddd, J = 7.3, 4.9, 0.9 Hz, 2H), 3.87 (s, 3H), 3.79 (s, 4H), 3.72 (s, 2H). <sup>13</sup>C NMR (101 MHz, CDCl<sub>3</sub>) δ 167.1, 159.4, 149.1, 144.7, 136.6, 129.7, 129.0, 128.7, 122.9, 122.2, 60.2, 58.3, 52.1. HRMS (ESI): m/z [M+H]<sup>+</sup> calcd for [C<sub>21</sub>H<sub>21</sub>N<sub>3</sub>O<sub>2</sub> +H<sup>+</sup>]: 348.1707; found: 348.1703.

## Methyl 4-((bis((6-methylpyridin-2-yl)methyl)amino)methyl)benzoate

2-(Iodomethyl)-6-methylpyridine (1.00 g; 4.29 mmol) and the methyl 4-(aminomethyl)benzoate hydrochloride (0.35 g; 1.74 mmol) was added to a flame dried flask and the flask was equipped with a rubber septum. The atmosphere was changed to argon and DMF (10 ml) was added via a syringe. DIPEA (1.12 g; 8.67 mmol) was added and the flask was equipped with an argon balloon. The stirred reaction mixture was heated to 70 °C overnight. The reaction mixture was poured into water (75 ml) and extracted with diethyl ether (3x30 ml). The combined ether phase was washed with NaCl (sat.) (2x20 ml), dried over MgSO<sub>4</sub>, filtered and evaporated *in vacuo*. The

residue was purified by column chromatography (Eluent: EtOAc/EtOH, 9:1; Rf: tailing) to give a yellow oil. Yield: 0.54 g (83%)

$^1\text{H}$  NMR (400 MHz,  $\text{CDCl}_3$ )  $\delta$  7.96 (d,  $J$  = 8.1 Hz, 2H), 7.54 (t,  $J$  = 7.6 Hz, 2H), 7.48 (d,  $J$  = 8.1 Hz, 2H), 7.40 (d,  $J$  = 7.7 Hz, 2H), 6.99 (d,  $J$  = 7.6 Hz, 2H), 3.88 (s, 3H), 3.77 (s, 4H), 3.71 (s, 2H), 2.50 (s, 6H).  $^{13}\text{C}$  NMR (101 MHz,  $\text{CDCl}_3$ )  $\delta$  167.1, 159.0, 157.7, 145.0, 136.8, 129.7, 128.9, 128.7, 121.6, 119.5, 60.3, 58.3, 52.1, 24.5. HRMS (ESI):  $m/z$   $[\text{M}+\text{H}]^+$  calcd for  $[\text{C}_{23}\text{H}_{25}\text{N}_3\text{O}_2 + \text{H}^+]$ : 376.2020; found: 376.2003. FT-IR ( $\text{Vmax}/\text{cm}^{-1}$ ): 3062(w), 2996(w), 2951(w), 2923(w), 2829(w), 1718(vs), 1579(m), 1577(m), 1456(m), 1435(m), 1275(vs), 1155(s), 786(m), 756(m), 732(m)

Methyl 4-((bis((6-((tert-butoxycarbonyl)amino)pyridin-2-yl)methyl)amino)methyl)-benzoate

Tert-butyl (6-(iodomethyl)pyridin-2-yl)carbamate (0.38 g; 1.14 mmol) and the methyl 4-(aminomethyl)benzoate hydrochloride (0.10 g; 0.50 mmol) was added to a flame dried flask and the flask was equipped with a rubber septum. The atmosphere was changed to argon and DMF (4 ml) was added via a syringe. DIPEA (0.33 g; 2.6 mmol) was added and the flask was equipped with an argon balloon. The stirred reaction mixture was heated to 70 °C overnight. The reaction mixture was poured into water (25 ml) and extracted with diethyl ether (3x15 ml). The combined ether phase was washed with NaCl (sat.) (2x10 ml), dried over  $\text{MgSO}_4$ , filtered and evaporated *in vacuo*. The residue was purified by column chromatography (Eluent: Hex/EtOAc, 80:20; Rf:0.20, tailing) to give a colourless oil which crystallised to give a white solid. Yield: 0.22 g (76%) mp: 134-136 °C

$^1\text{H}$  NMR (400 MHz,  $\text{CDCl}_3$ )  $\delta$  7.97 (d,  $J$  = 8.2 Hz, 2H), 7.77 (d,  $J$  = 8.2 Hz, 2H), 7.63 (t,  $J$  = 7.9 Hz, 2H), 7.49 – 7.42 (m, 4H), 7.16 (d,  $J$  = 7.4 Hz, 2H), 3.89 (s, 3H), 3.69 (s, 2H), 3.65 (s, 4H), 1.48 (s, 18H).  $^{13}\text{C}$  NMR (101 MHz,  $\text{CDCl}_3$ )  $\delta$  167.1, 157.7, 152.5, 151.3, 144.6, 138.7, 129.8, 129.1, 128.8, 117.6, 110.5, 81.0, 59.5, 58.0, 52.2, 28.4. HRMS (ESI):  $m/z$   $[\text{M}+\text{H}]^+$  calcd. for  $[\text{C}_{31}\text{H}_{39}\text{N}_5\text{O}_6 + \text{H}^+]$ : 578.2973; found: 578.2979;  $m/z$   $[\text{M}+\text{Na}]^+$  calcd. for  $[\text{C}_{31}\text{H}_{39}\text{N}_5\text{O}_6 + \text{Na}^+]$ : 600.2793; found: 600.2795. FT-IR ( $\text{Vmax}/\text{cm}^{-1}$ ): 3198(w), 2978(w), 2928(w), 2824(w), 1724(s), 1579(m), 1525(m), 1456(s), 1276(s), 1228(s), 1149(s), 1068(m), 991(m), 800(m)

4-((Bis(pyridin-2-ylmethyl)amino)methyl)benzoic acid **9**

Methyl 4-((bis(pyridin-2-ylmethyl)amino)methyl)benzoate (0.91 g; 2.6 mmol) was dissolved in a minimum volume of methanol. NaOH (2 M) (10 ml) was added, and the mixture was stirred at RT for 5 h. HCl (1 M) (20 ml) was added and the solution was evaporated *in vacuo*. DCM (50 ml) was added, followed by  $\text{Na}_2\text{SO}_4$  and the suspension was stirred for 5 min. The suspension was filtered and the filtrate was concentrated *in vacuo*. The residue was taken up in hot acetonitrile (15 ml) and allowed to cool to RT before being left at 4 °C overnight. The solvent was pipetted off and the crystals was washed with additional acetonitrile to give a white solid. Yield: 0.56 g (64%) mp.: 168- 170 °C



<sup>1</sup>H NMR (400 MHz, DMSO) δ 12.90 (s, 1H), 8.49 (ddd, J = 4.8, 1.7, 0.9 Hz, 2H), 7.90 (d, J = 8.2 Hz, 2H), 7.78 (td, J = 7.7, 1.8 Hz, 2H), 7.57 (d, J = 7.8 Hz, 2H), 7.53 (d, J = 8.2 Hz, 2H), 7.25 (ddd, J = 7.4, 4.7, 0.8 Hz, 2H), 3.71 (s, 4H), 3.70 (s, 2H). <sup>13</sup>C NMR (101 MHz, DMSO) δ 167.3, 158.9, 148.9, 144.2, 136.7, 129.5, 129.4, 128.7, 122.6, 122.2, 59.2, 57.2. HRMS (ESI): m/z [M+H]<sup>+</sup> calcd. for [C<sub>20</sub>H<sub>19</sub>N<sub>3</sub>O<sub>2</sub> +H<sup>+</sup>]: 334.1550; found: 334.1551. FT-IR (Vmax/cm<sup>-1</sup>): 3064(w), 2881(w), 2814(w), 2463(b), 1897(b), 1692(m), 1599(m), 1571(m), 1433(m), 1273(s), 1247(s), 1013(m), 763(s), 753(s)

#### 4-((Bis((6-methylpyridin-2-yl)methyl)amino)methyl)benzoic acid **10**

Methyl 4-((bis((6-methylpyridin-2-yl)methyl)amino)methyl)benzoate (1.12 g; 3.0 mmol) was dissolved in a minimum volume of methanol. NaOH (2 M) (10 ml) was added, and the mixture was stirred at RT for 5 h. HCl (1 M) (20 ml) was added and the solution was evaporated *in vacuo*. DCM (50 ml) was added, followed by Na<sub>2</sub>SO<sub>4</sub> and the suspension was stirred for 5 min. The suspension was filtered and the filtrate was concentrated *in vacuo*. The residue was taken up in hot acetonitrile (15 ml) and allowed to cool to RT before being left at 4°C overnight. The solvent was pipetted off and the crystals were washed with additional acetonitrile to give a white solid. Yield: 0.41 g (38%) mp.: 146-148 °C

<sup>1</sup>H NMR (400 MHz, DMSO) δ 12.90 (s, 1H), 7.91 (d, J = 8.2 Hz, 2H), 7.64 (t, J = 7.7 Hz, 2H), 7.53 (d, J = 8.2 Hz, 2H), 7.38 (d, J = 7.7 Hz, 2H), 7.08 (d, J = 7.6 Hz, 2H), 3.66 (s, 2H), 3.65 (s, 4H), 2.41 (s, 6H). <sup>13</sup>C NMR (101 MHz, DMSO) δ 167.3, 158.3, 157.0, 144.3, 136.9, 129.5, 129.4, 128.6, 121.4, 119.3, 59.3, 57.2, 24.0. HRMS (ESI): m/z [M+H]<sup>+</sup> calcd. for [C<sub>22</sub>H<sub>23</sub>N<sub>3</sub>O<sub>2</sub> +H<sup>+</sup>]: 362.1863; found: 362.1860. FT-IR (Vmax/cm<sup>-1</sup>): 3061(w), 2920(w), 2834(w), 2441(w), 1692(s), 1601(m), 1591(m), 1578(s), 1458(s), 1275(vs), 1244(vs), 1122(m), 1013(m), 973(m), 795(vs), 778(vs), 756(vs)

#### 4-((Bis((6-((tert-butoxycarbonyl)amino)pyridin-2-yl)methyl)amino)methyl)benzoic acid **11**

Methyl 4-((bis((6-((tert-butoxycarbonyl)amino)pyridin-2-yl)methyl)amino)methyl)benzoate (0.20 g; 0.35 mmol) was dissolved in EtOH (10 ml) and NaOH(s) (0.40 g; 10 mmol) was added and left to dissolve and react on sonication for 1.5h. HCl (1M) (10ml) was added and the clear mixture was concentrated *in vacuo*. The residue was taken up in DCM (25 ml), and MgSO<sub>4</sub> was added. After 5 min of stirring, the suspension was filtered and the filtrate was concentrated *in vacuo*. The residue was recrystallized from hot ethyl acetate to give a white crystalline solid. Yield: 0.13 g (67%) Mp: 128-130°C

<sup>1</sup>H NMR (400 MHz, MeOD) δ 8.01 (d, J = 8.2 Hz, 2H), 7.77 – 7.71 (m, 4H), 7.66 (d, J = 8.2 Hz, 2H), 7.04 (dd, J = 5.9, 2.2 Hz, 2H), 4.57 (s, 2H), 4.43 (s, 4H), 1.57 (s, 18H). <sup>13</sup>C NMR (101 MHz, MeOD) δ 168.9, 154.2, 153.6, 150.4, 141.1, 136.9, 133.1, 132.3, 131.1, 119.4, 113.6, 82.2, 59.1, 58.2, 28.6. HRMS (ESI): m/z [M+H]<sup>+</sup> calcd. for [C<sub>30</sub>H<sub>37</sub>N<sub>5</sub>O<sub>6</sub> +H<sup>+</sup>]: 564.2817; found: 564.2818; m/z [M+Na<sup>+</sup>] calcd. for [C<sub>30</sub>H<sub>37</sub>N<sub>5</sub>O<sub>6</sub> +Na<sup>+</sup>]: 586.2636; found: 586.2640. FT-IR (Vmax/cm<sup>-1</sup>): 3202(w), 2982(w), 2928(w), 2591(w), 1727(s), 1708(s), 1585(m), 1525(m), 1463(m), 1226(s), 1151(vs), 1082(m)

#### 4-((Bis(pyridin-2-ylmethyl)amino)methyl)-N-methylbenzamide **12**

Methylamine hydrochloride (6.70 g; 99.2 mmol) was dissolved in methanol (15 ml) and NaOH(s) (3.86 g; 96.5 mmol) was added and the reaction mixture cooled on an ice bath. The mixture was stirred for 10 min at RT. Methyl 4-((bis(pyridin-2-ylmethyl)amino)methyl)benzoate (0.74 g; 2.1 mmol) was dissolved in methanol (5 ml) and added to the first suspension (final conc. 20% w/w % methyl amine). The reaction mixture was stirred at RT for 2 days in a sealed system with a balloon attached. The methanolic mix was filtered and the filtrate was evaporated over N<sub>2</sub> stream overnight. The solid was taken up in water (40 ml) and extracted with DCM (3x25 ml). The combined DCM phase was dried over MgSO<sub>4</sub>, filtered and evaporated *in vacuo* to give a colourless oil. The oil was further purified by column chromatography (Eluent: 90:10, EtOAc/EtOH, Rf: 0.10) to give a colourless oil. Yield: 0.48 g (65%)

<sup>1</sup>H NMR (400 MHz, CDCl<sub>3</sub>) δ 8.49 (ddd, J = 4.9, 1.6, 1.0 Hz, 2H), 7.70 (d, J = 8.2 Hz, 2H), 7.64 (td, J = 7.7, 1.7 Hz, 2H), 7.53 (d, J = 7.8 Hz, 2H), 7.42 (d, J = 8.2 Hz, 2H), 7.13 (ddd, J = 7.2, 4.7, 0.9 Hz, 2H), 6.55 – 6.49 (m, 1H), 3.76 (s, 4H), 3.67 (s, 2H), 2.95 (d, J = 4.8 Hz, 3H). <sup>13</sup>C NMR (101 MHz, CDCl<sub>3</sub>) δ 168.3, 159.4, 149.1, 142.7, 136.6, 133.6, 129.0, 127.0, 122.9, 122.2, 60.1, 58.2, 26.9. HRMS (ESI): m/z [M+H]<sup>+</sup> calcd. for [C<sub>21</sub>H<sub>22</sub>N<sub>4</sub>O +H<sup>+</sup>]: 347.1866; found: 347.1881. FT-IR (Vmax/cm<sup>-1</sup>): 3449(w), 3280(m), 3063(w), 2931(w), 2818(w), 1637(s), 1547(s), 1432(m), 1302(s), 758(vs)

#### 4-((Bis((6-methylpyridin-2-yl)methyl)amino)methyl)-N-methylbenzamide **13**

Methylamine hydrochloride (6.70 g; 99.2 mmol) was dissolved in methanol (15 ml) and NaOH(s) (3.86 g; 96.5 mmol) was added. The reaction mixture cooled on an ice bath and stirred for 10 min at RT. Methyl 4-((bis((6-methylpyridin-2-yl)methyl)amino)methyl)benzoate (0.85 g; 2.3 mmol) was dissolved in methanol (5 ml) and added to the suspension (final conc. 20% w/w % methyl amine). The reaction mixture was stirred at RT for 2 days in a sealed system with a balloon attached. The methanolic mix was filtered and the filtrate was evaporated over N<sub>2</sub> stream overnight. The solid was taken up in water (40 ml) and extracted with DCM (3x25 ml). The combined DCM phase was dried over MgSO<sub>4</sub>, filtered and evaporated *in vacuo* to give an orange oil. The oil was further purified by column chromatography (Eluent: 90:10, EtOAc/EtOH, Rf: 0.21) to give a colourless oil. Yield: 0.57 g (67%)

<sup>1</sup>H NMR (400 MHz, CDCl<sub>3</sub>) δ 7.69 (d, J = 8.2 Hz, 2H), 7.53 (t, J = 7.7 Hz, 2H), 7.42 (d, J = 8.2 Hz, 2H), 7.38 (d, J = 7.7 Hz, 2H), 6.97 (d, J = 7.5 Hz, 2H), 6.58 – 6.50 (m, 1H), 3.72 (s, 4H), 3.66 (s, 2H), 2.94 (d, J = 4.8 Hz, 3H), 2.48 (s, 6H). <sup>13</sup>C NMR (101 MHz, CDCl<sub>3</sub>) δ 168.3, 159.0, 157.6, 143.0, 136.8, 133.5, 128.9, 127.0, 121.6, 119.5, 60.2, 58.1, 26.8, 24.5. HRMS (ESI): m/z [M+H]<sup>+</sup> calcd. for [C<sub>23</sub>H<sub>26</sub>N<sub>4</sub>O +H<sup>+</sup>]: 375.2179; found: 375.2197 107 FT-IR (Vmax/cm<sup>-1</sup>): 3454(w), 3317(w), 3062(w), 2922(w), 2823(w), 1639(s), 1578(m), 1547(s), 1455(s), 1302(m), 787(m), 751(s)

Di-tert-butyl (((4-(methylcarbamoyl)benzyl)azanediyl)bis(methylene))bis(pyridine-6,2-diyl)dicarbamate

Methylamine hydrochloride (6.70 g; 99.2 mmol) was dissolved in ethanol (15 ml) and NaOH(s) (3.86 g; 96.5 mmol) was added and the reaction mixture cooled on an ice bath. The mixture was stirred for 10 min at RT. Methyl 4-((bis((6-((tert-butoxycarbonyl)amino)pyridin-2-yl)methyl)amino)methyl)-benzoate (0.260 g; 0.450 mmol) was dissolved in ethanol (5 ml) and added to the first suspension (final conc. 20% w/w % methyl amine) The reaction mixture was stirred at 40 °C for 4 days in a sealed system with a balloon attached. The ethanolic mix was filtered and the filtrate was evaporated under a N<sub>2</sub> stream overnight. The residual solid was taken up in water (40 ml) and extracted with DCM (3x25 ml). The combined DCM phase was washed with brine (20 ml), dried over MgSO<sub>4</sub>, filtered and evaporated *in vacuo* to give a white solid. The solid was further purified by column chromatography (Eluent: EtOAc/Hex, 60:40, Rf: 0.23) to give a white solid. Yield: 0.115 g (44%) mp: 105-107 °C

<sup>1</sup>H NMR (400 MHz, CDCl<sub>3</sub>) δ 7.76 (d, J = 8.2 Hz, 2H), 7.68 – 7.59 (m, 4H), 7.45 (s, 2H), 7.41 (d, J = 8.1 Hz, 2H), 7.15 (d, J = 7.4 Hz, 2H), 6.27 – 6.17 (m, 1H), 3.66 (s, 2H), 3.64 (s, 4H), 2.99 (d, J = 4.8 Hz, 3H), 1.48 (s, 18H). <sup>13</sup>C NMR (101 MHz, CDCl<sub>3</sub>) δ 168.3, 157.8, 152.5, 151.3, 142.7, 138.7, 133.6, 129.0, 127.0, 117.7, 110.5, 81.0, 59.5, 57.9, 28.4, 26.9. HRMS (ESI): m/z [M+H]<sup>+</sup> calcd. for [C<sub>31</sub>H<sub>40</sub>N<sub>6</sub>O<sub>5</sub> +H<sup>+</sup>]: 577.3133; found: 577.3143; m/z [M+Na]<sup>+</sup> calcd. for [C<sub>31</sub>H<sub>40</sub>N<sub>6</sub>O<sub>5</sub> +Na<sup>+</sup>]: 599.2952; found: 599.2953. FT-IR (Vmax/cm<sup>-1</sup>): 3448-3153(w), 2977(w), 2928(w), 2805(w), 1726(s), 1642(w), 1579(m), 1518(m), 1456(s), 1407(m), 1366(m), 1277(m), 1226(s), 1150(vs), 1082(m), 797(m), 753(m)

#### 4-((Bis((6-aminopyridin-2-yl)methyl)amino)methyl)-N-methylbenzamide **14**

Methyl 4-((bis((6-((tert-butoxycarbonyl)amino)pyridin-2-yl)methyl)amino)methyl)-benzoate (109 mg; 0.189 mmol) was taken up in 20% TFA in DCM (1:4) (5 ml) and the reaction mixture was stirred at 25°C for 16h. The reaction mixture was evaporated over an N<sub>2</sub> stream and the residue was taken up in DCM (20 ml). The DCM solution was washed with NaHCO<sub>3</sub> (sat.) (2x20 ml) and the combined water phases were extracted with DCM (20 ml). The combined organic phase was dried over MgSO<sub>4</sub>, filtered and evaporated *in vacuo* to give a white solid. Yield: 59.8 mg (84%) Mp: 94-96 °C

<sup>1</sup>H NMR (400 MHz, MeOD) δ 7.75 (d, J = 9.9 Hz, 2H), 7.48 (d, J = 8.2 Hz, 2H), 7.42 (t, J = 7.8 Hz, 2H), 6.88 (d, J = 7.3 Hz, 2H), 6.42 (d, J = 8.2 Hz, 2H), 3.66 (s, 2H), 3.53 (s, 4H), 2.90 (s, 3H). <sup>13</sup>C NMR (101 MHz, MeOD) δ 170.6, 160.4, 158.2, 144.3, 139.7, 134.3, 129.9, 128.2, 112.7, 108.4, 60.6, 59.1, 26.9. HRMS (ESI): m/z [M+H]<sup>+</sup> calcd. for [C<sub>21</sub>H<sub>24</sub>N<sub>6</sub>O +H<sup>+</sup>]: 377.2084; found: 377.2095. FT-IR (Vmax/cm<sup>-1</sup>): 3441(w), 3322(m), 3188(w), 2813(w), 1614(s), 1598(m), 1570(s), 1460(s), 1294(m)

## NMR Spectra

(6-Methylpyridin-2-yl)methyl methanesulfonate  
 $^1\text{H}$  NMR (400 MHz,  $\text{CDCl}_3$ )

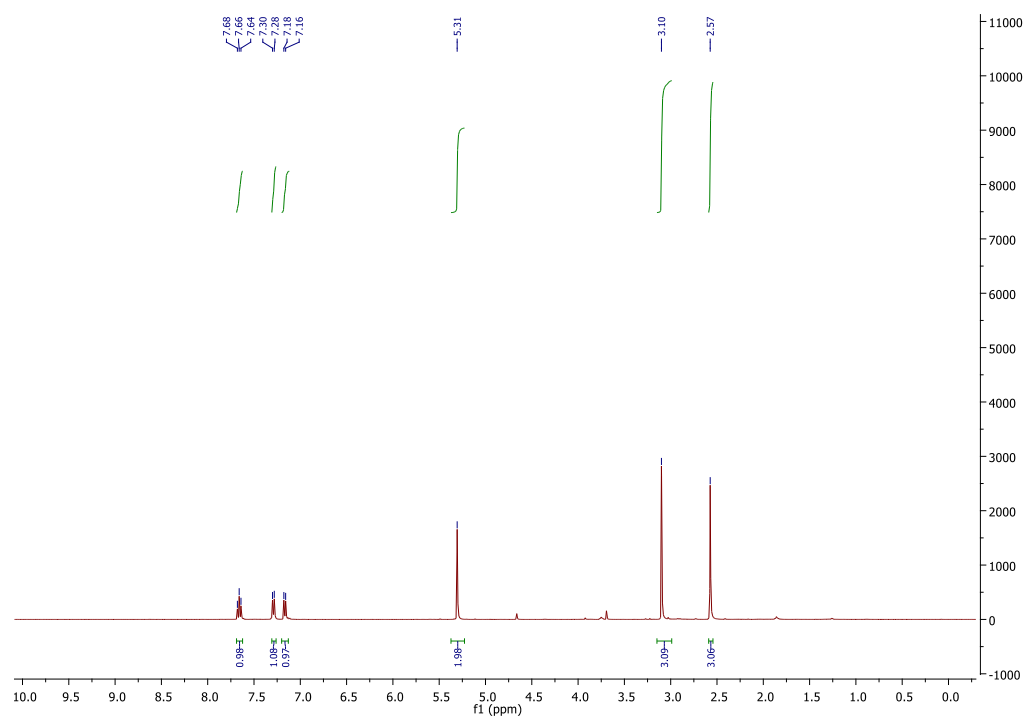

$^{13}\text{C}$  NMR (101 MHz,  $\text{CDCl}_3$ )

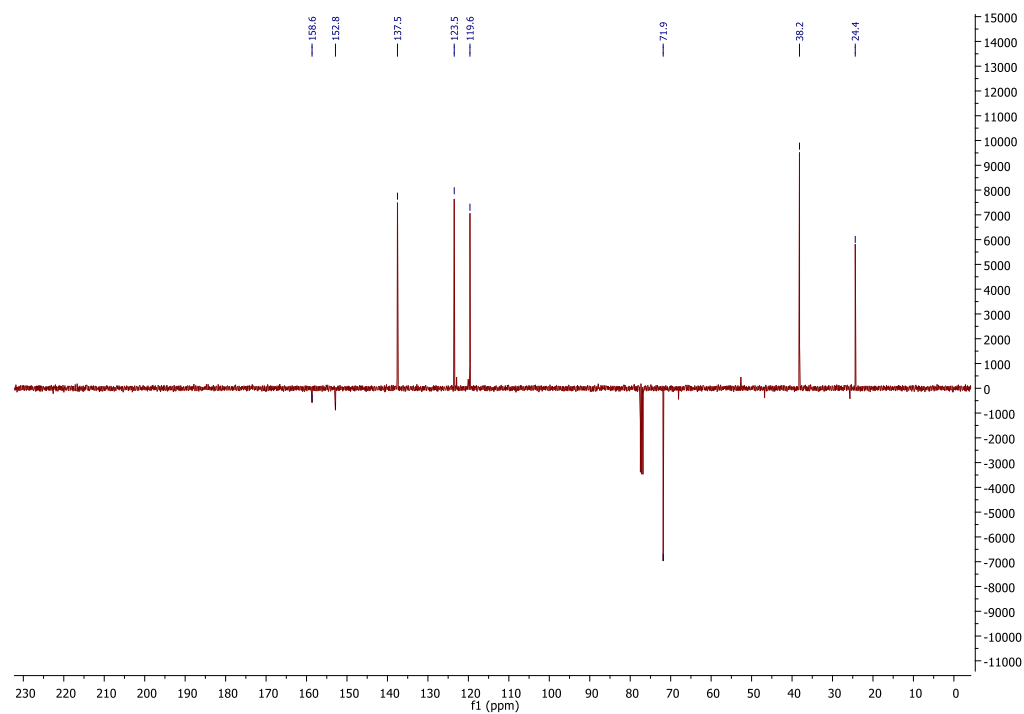

2-(Iodomethyl)-6-methylpyridine  
<sup>1</sup>H NMR (400 MHz, CDCl<sub>3</sub>)

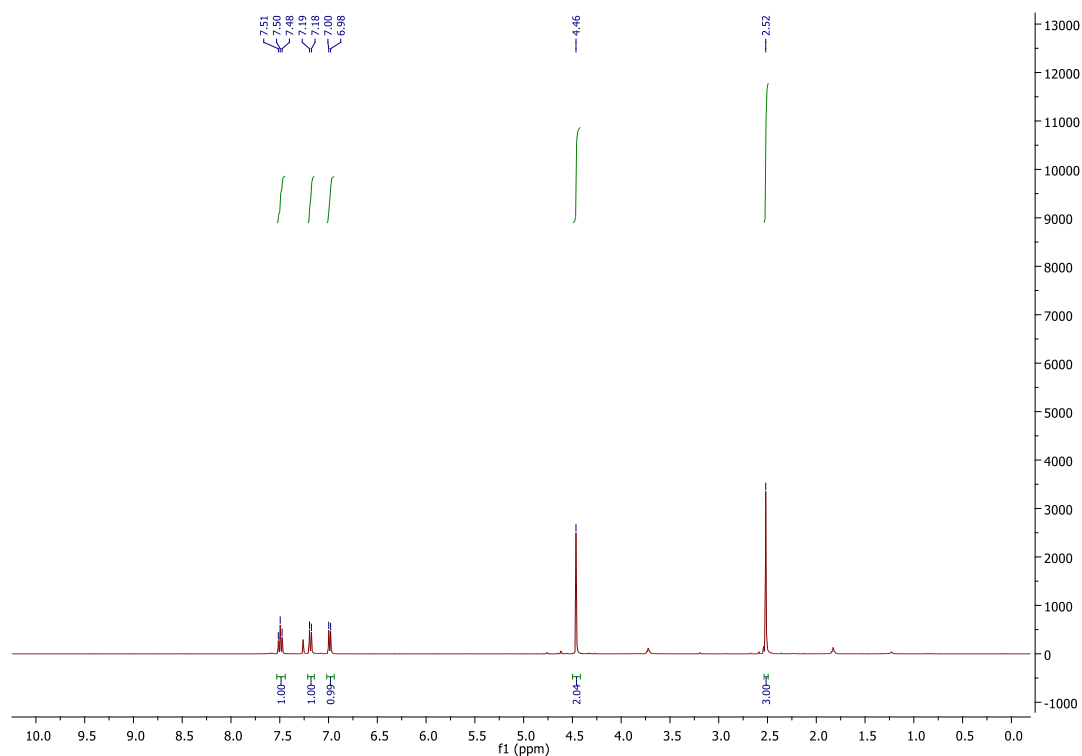

<sup>13</sup>C NMR (101 MHz, CDCl<sub>3</sub>)

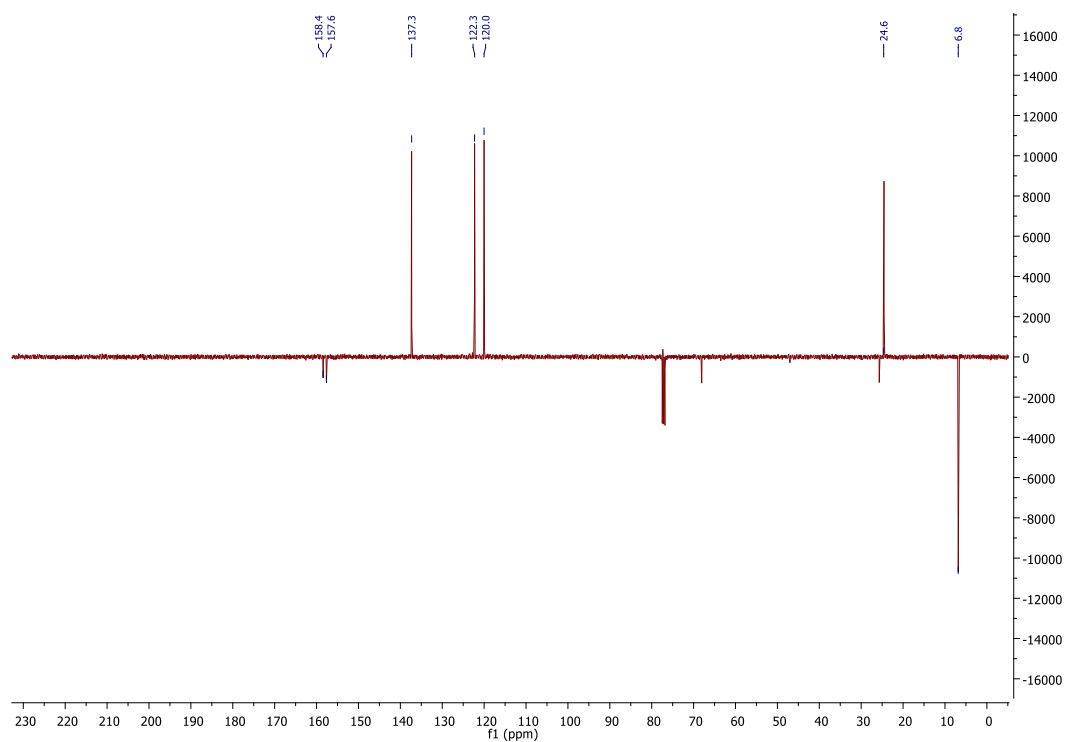

Diethyl pyridine-2,6-dicarboxylate **3**  
<sup>1</sup>H NMR (400 MHz, CDCl<sub>3</sub>)

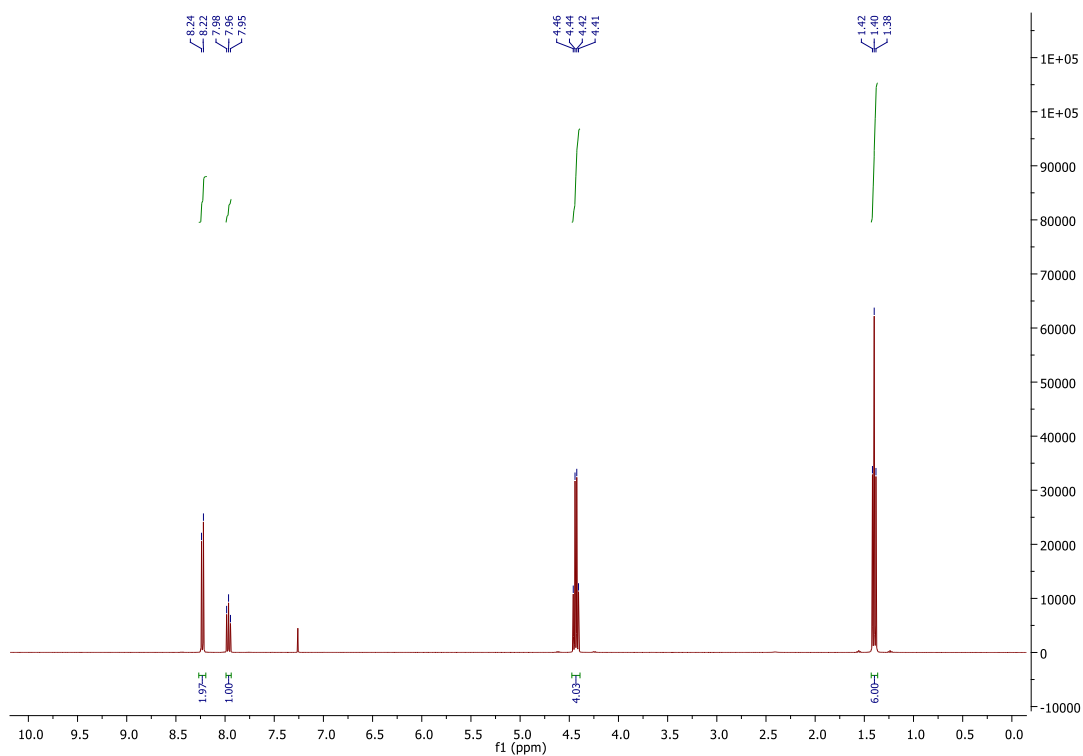

<sup>13</sup>C NMR (101 MHz, CDCl<sub>3</sub>)

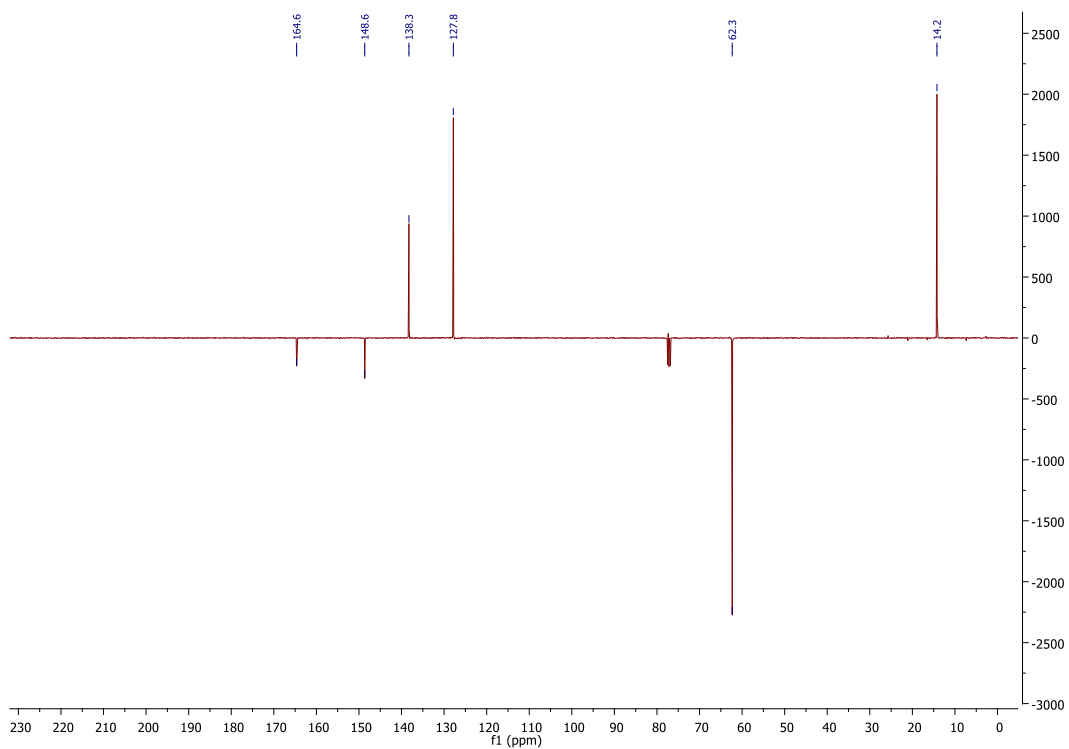

6-(Ethoxycarbonyl)picolinic acid **4**  
<sup>1</sup>H NMR (400 MHz, CDCl<sub>3</sub>)

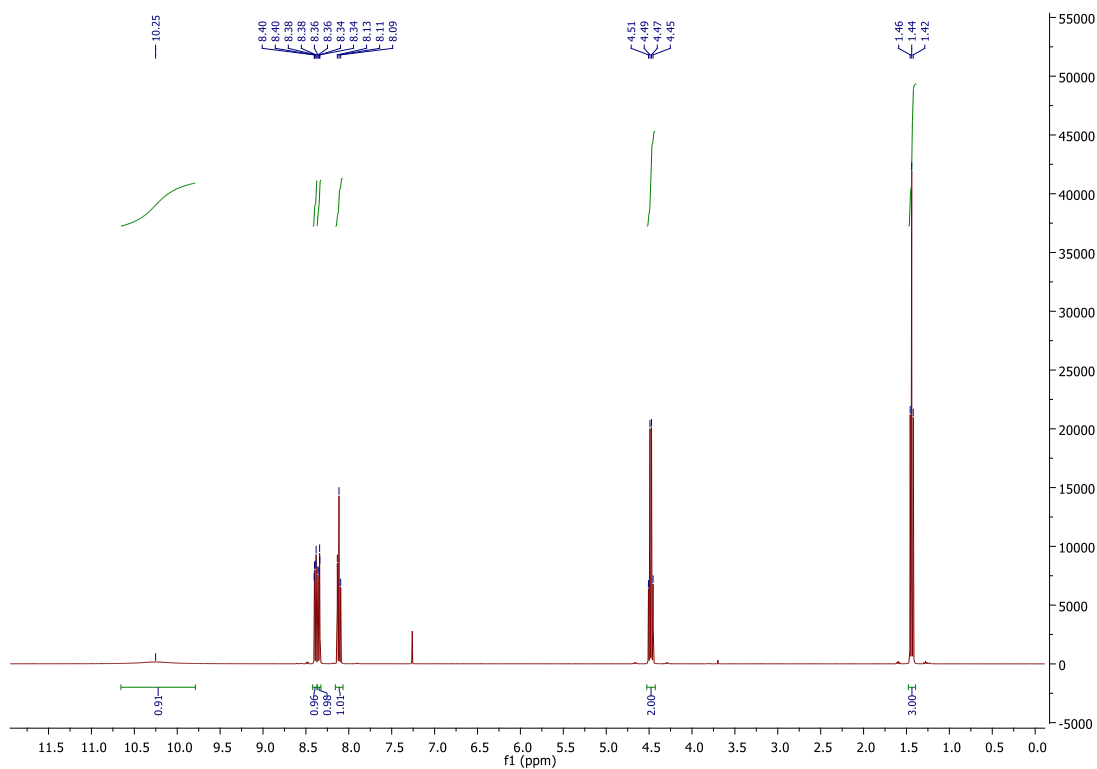 $^{13}\text{C}$  NMR (101 MHz,  $\text{CDCl}_3$ )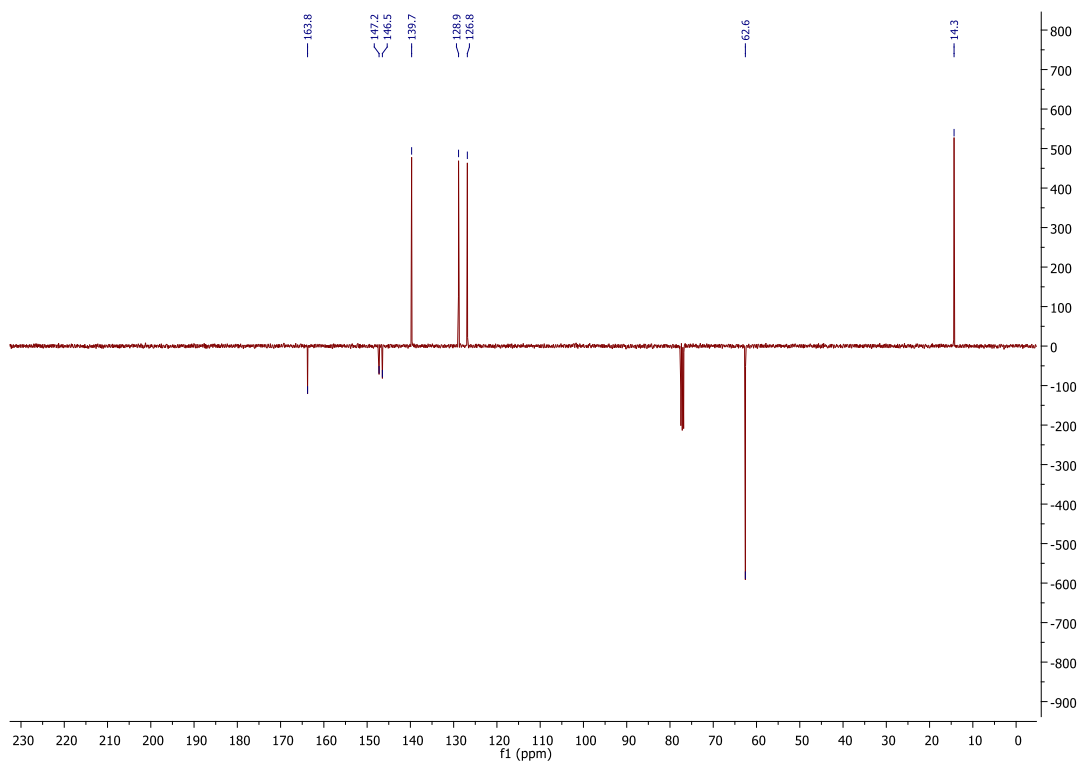

# Ethyl 6-((tert-butoxycarbonyl)amino)picolinate **5**

$^1\text{H}$  NMR (400 MHz,  $\text{CDCl}_3$ )

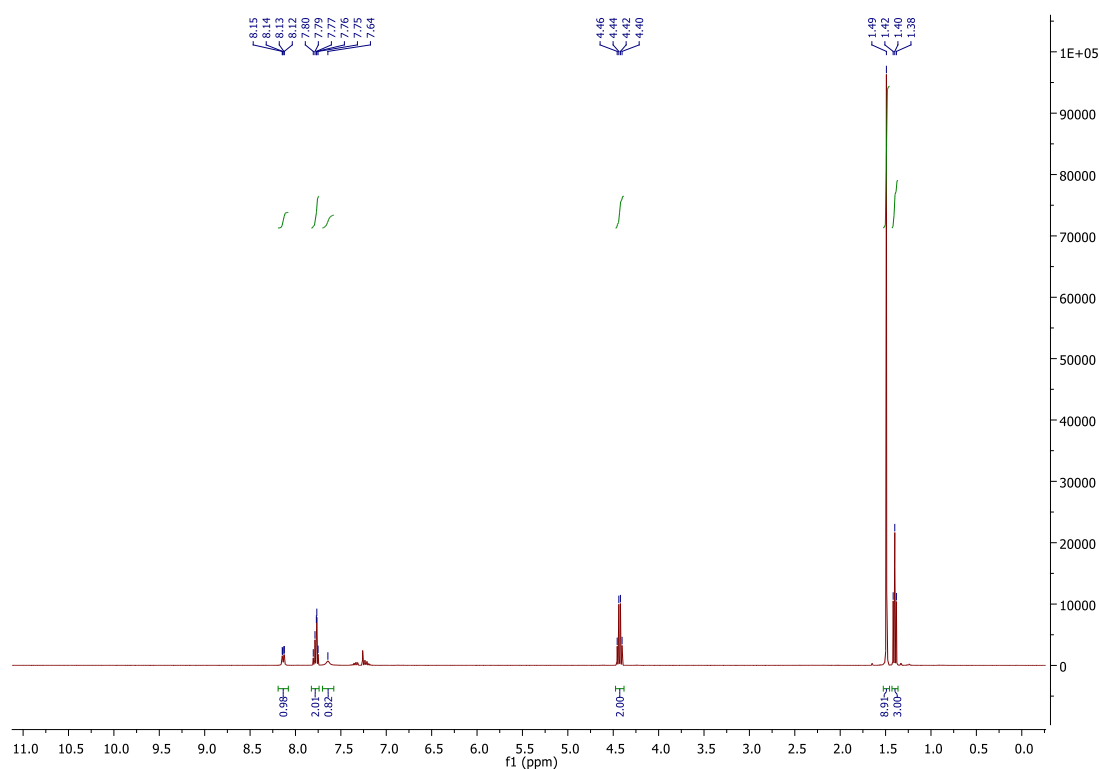

$^{13}\text{C}$  NMR (101 MHz,  $\text{CDCl}_3$ )

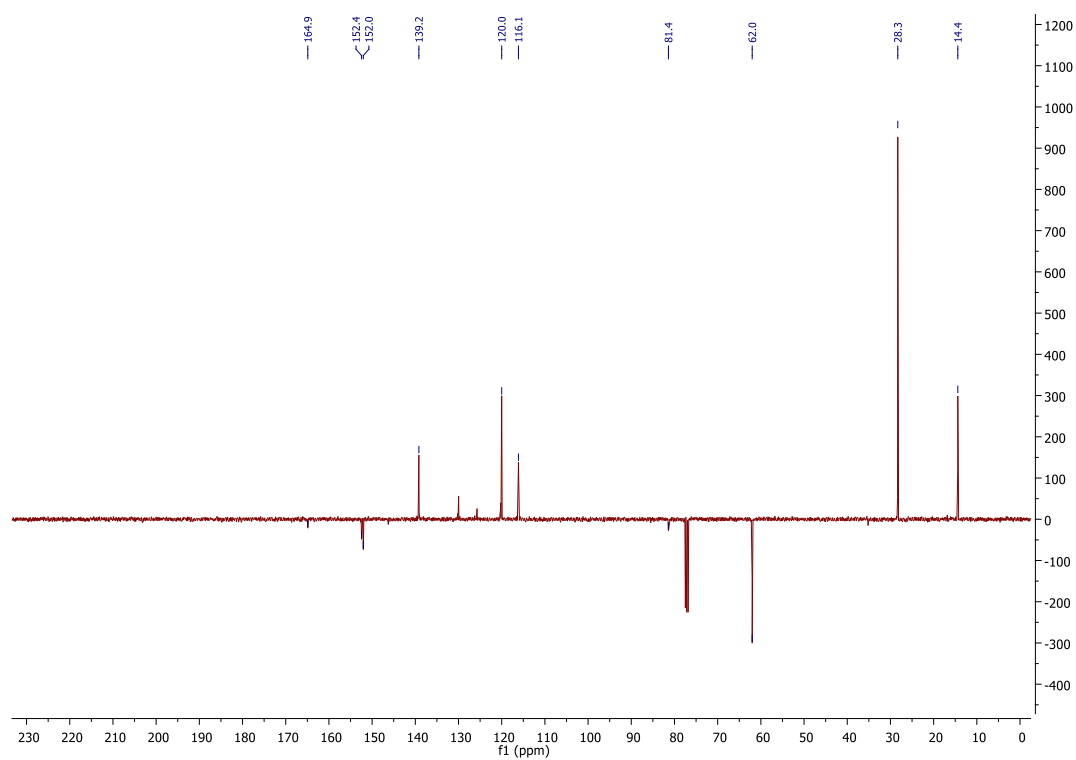



Tert-butyl (6-(hydroxymethyl)pyridin-2-yl)carbamate **1**  
<sup>1</sup>H NMR (400 MHz, CDCl<sub>3</sub>)

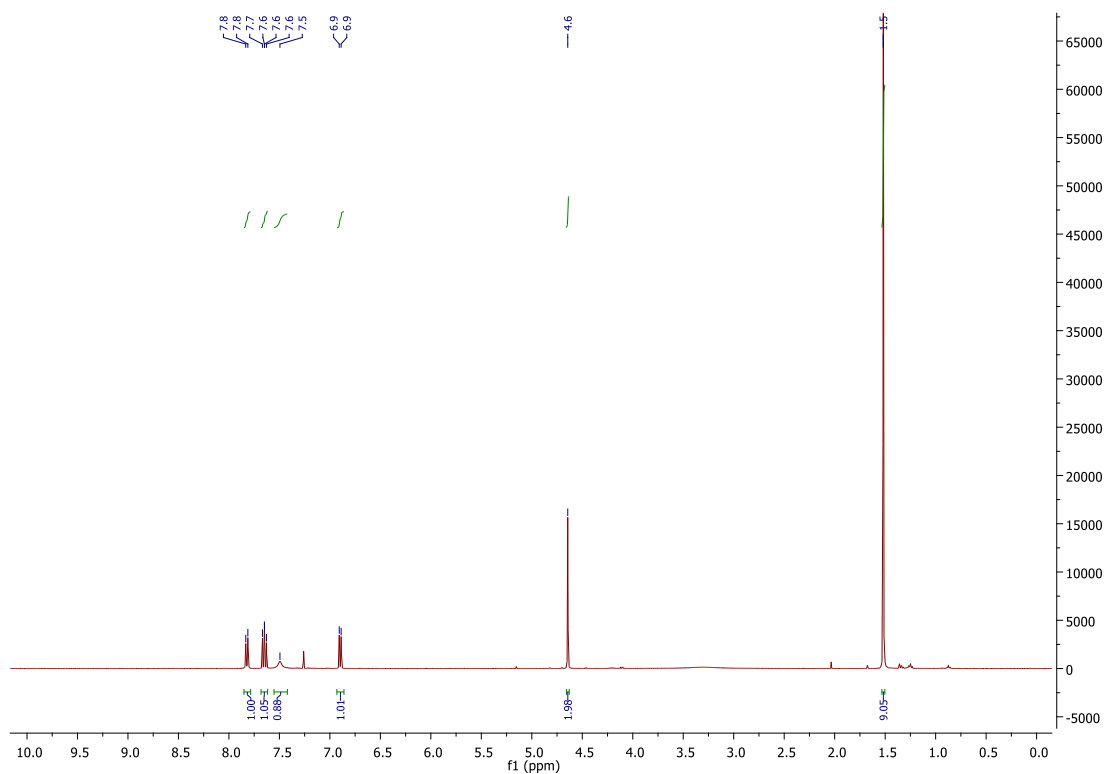

<sup>13</sup>C NMR (101 MHz, CDCl<sub>3</sub>)

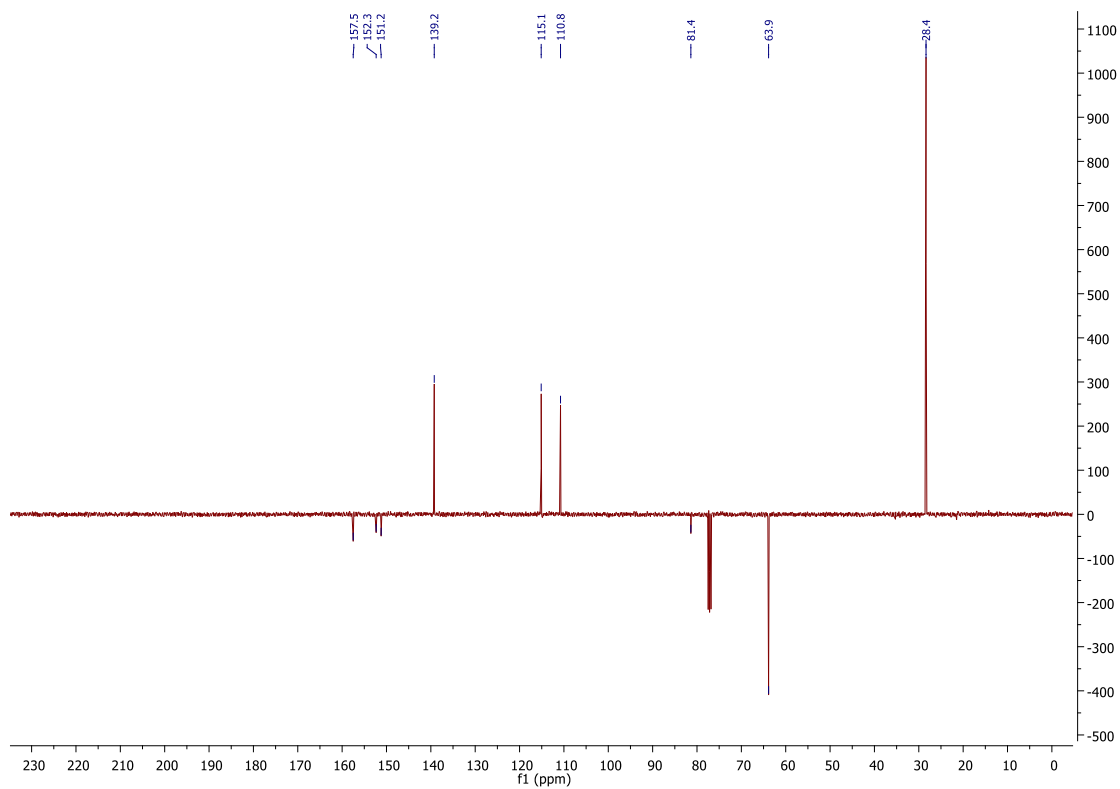

(6-((Tert-butoxycarbonyl)amino)pyridin-2-yl)methyl methanesulfonate **6**  
<sup>1</sup>H NMR (400 MHz, CDCl<sub>3</sub>)

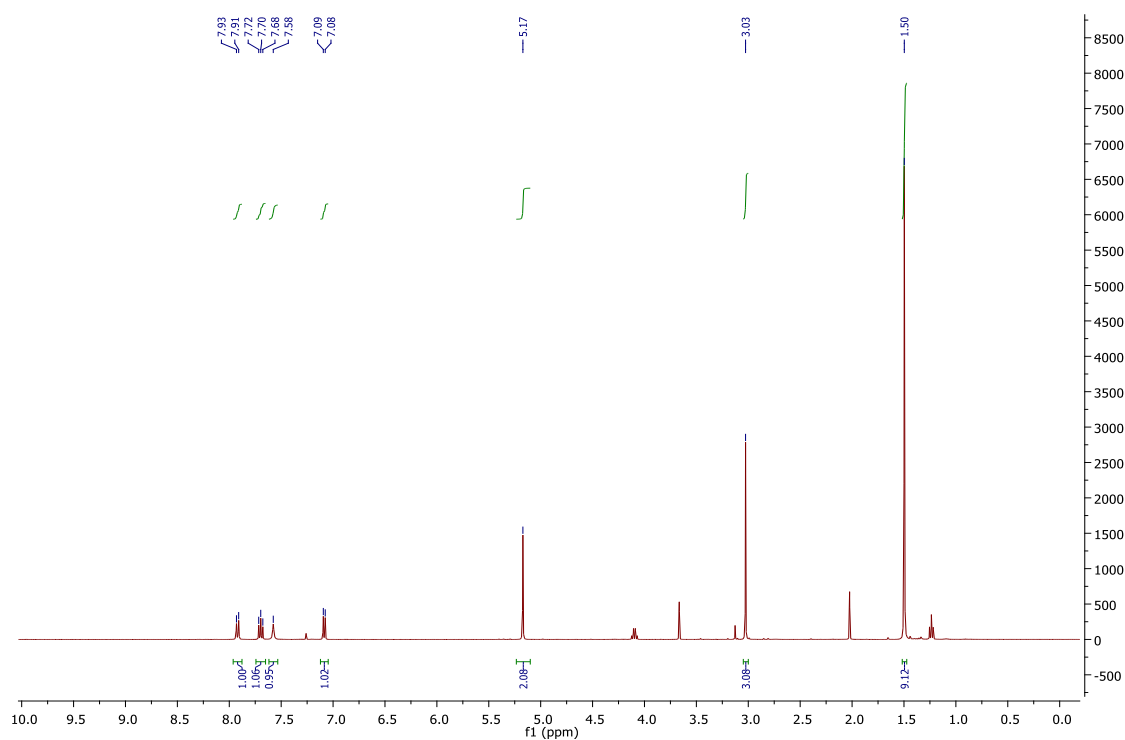

<sup>13</sup>C NMR (101 MHz, CDCl<sub>3</sub>)

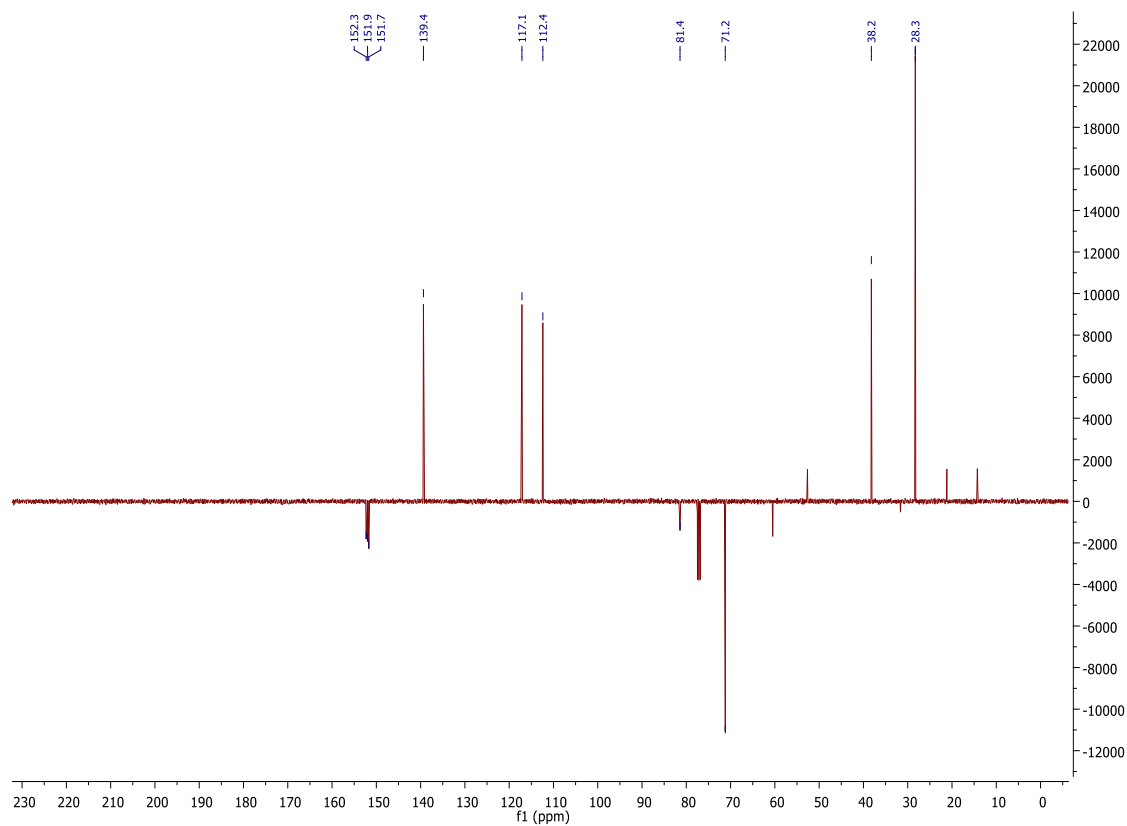

Tert-butyl (6-(iodomethyl)pyridin-2-yl)carbamate **7**  
<sup>1</sup>H NMR (400 MHz, CDCl<sub>3</sub>)

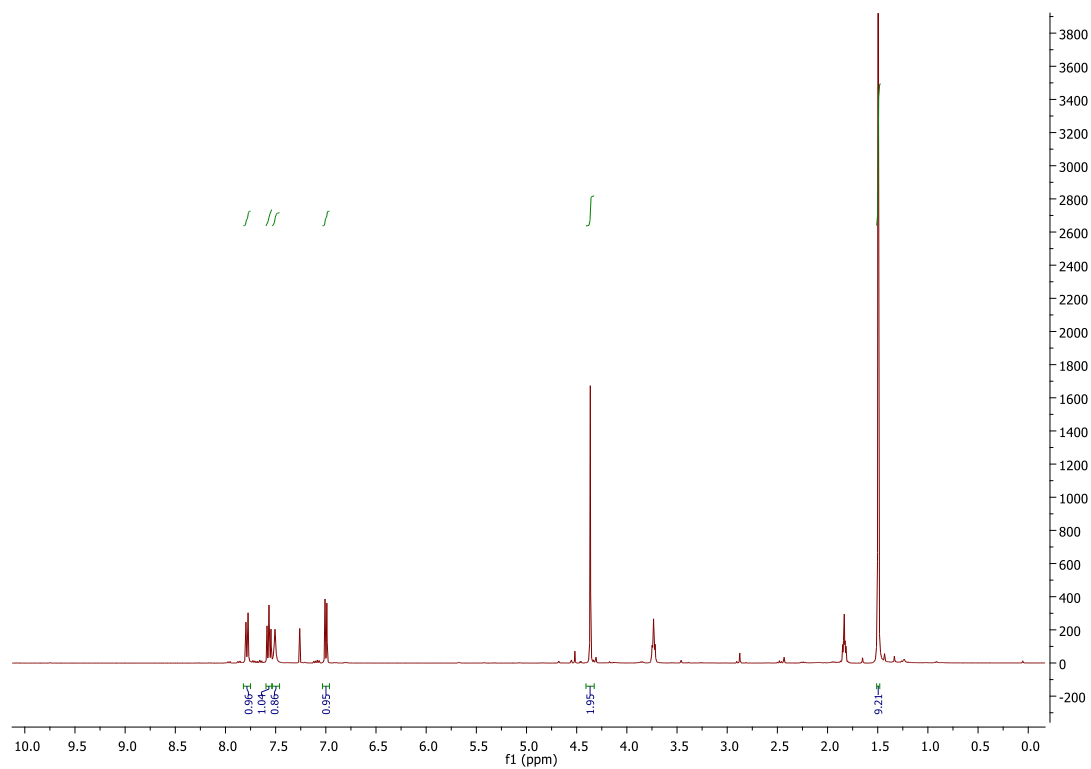

<sup>13</sup>C NMR (101 MHz, CDCl<sub>3</sub>)

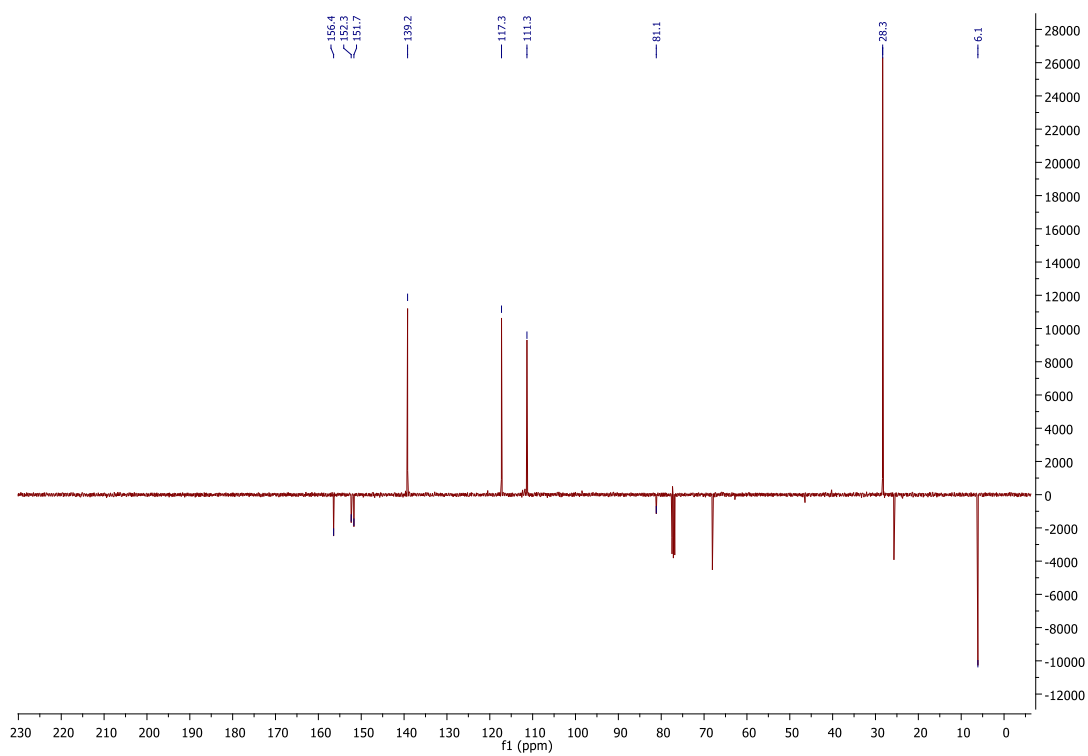

Methyl 4-(aminomethyl)benzoate hydrochloride **8**  
 $^1\text{H}$  NMR (400 MHz, DMSO- $d_6$ )

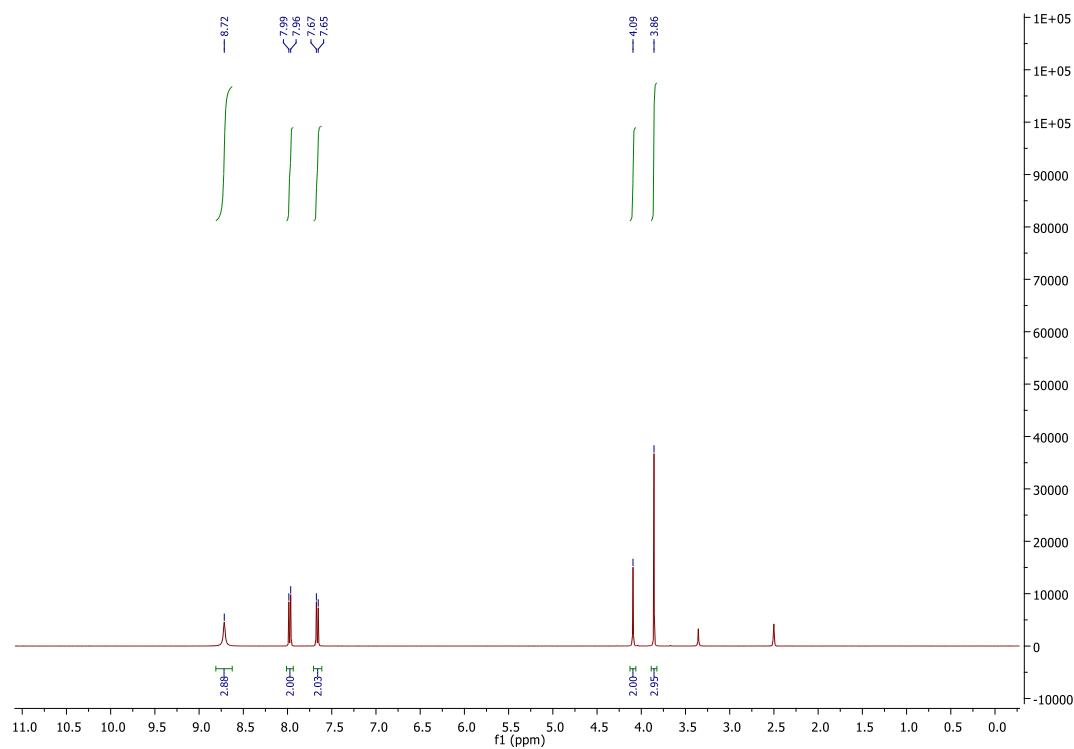

$^{13}\text{C}$  NMR (101 MHz, DMSO- $d_6$ )

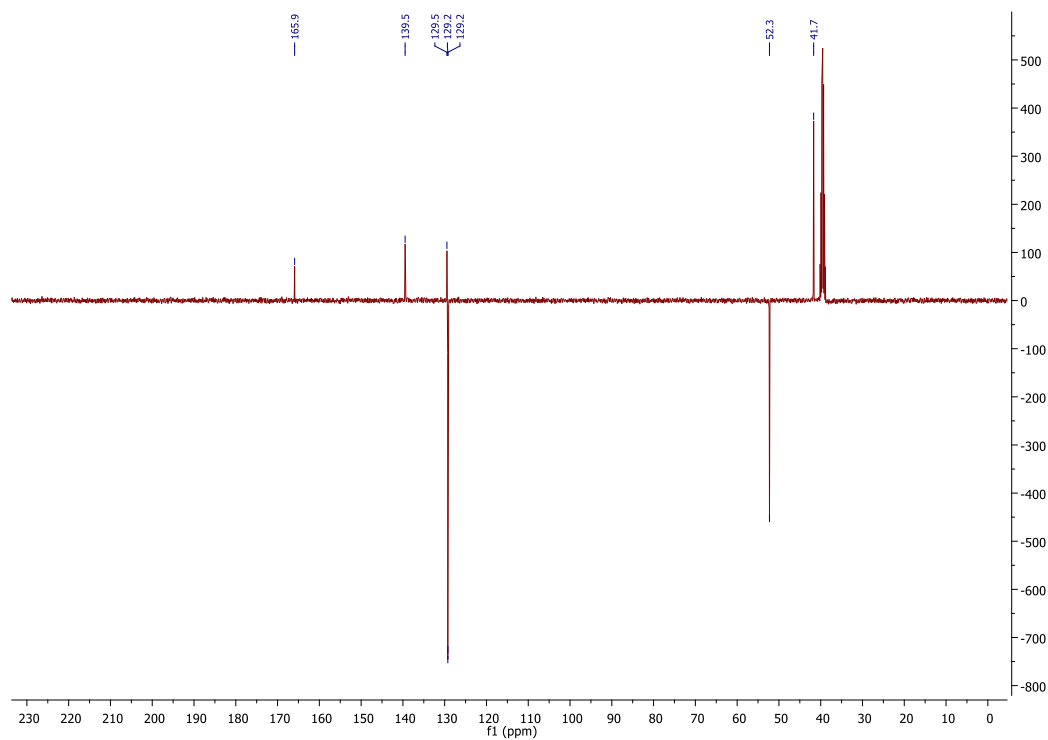

Methyl 4-((bis(pyridin-2-ylmethyl)amino)methyl)benzoate  
<sup>1</sup>H NMR (400 MHz, CDCl<sub>3</sub>)

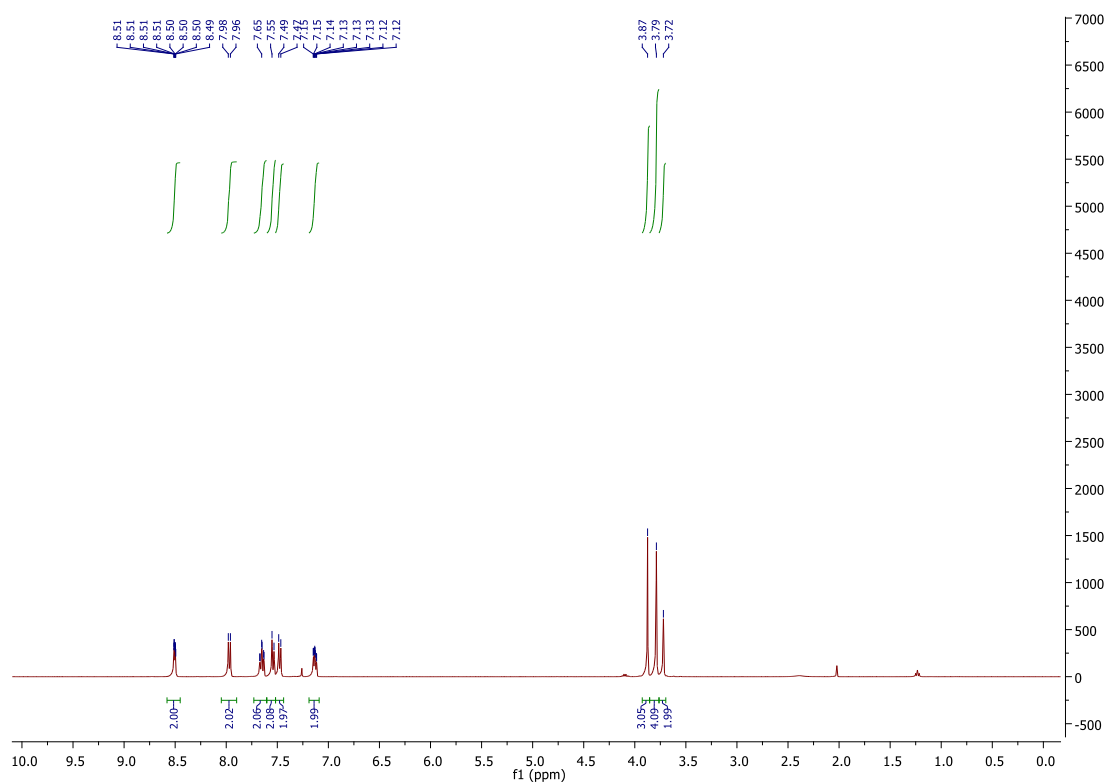

<sup>13</sup>C NMR (101 MHz, CDCl<sub>3</sub>)

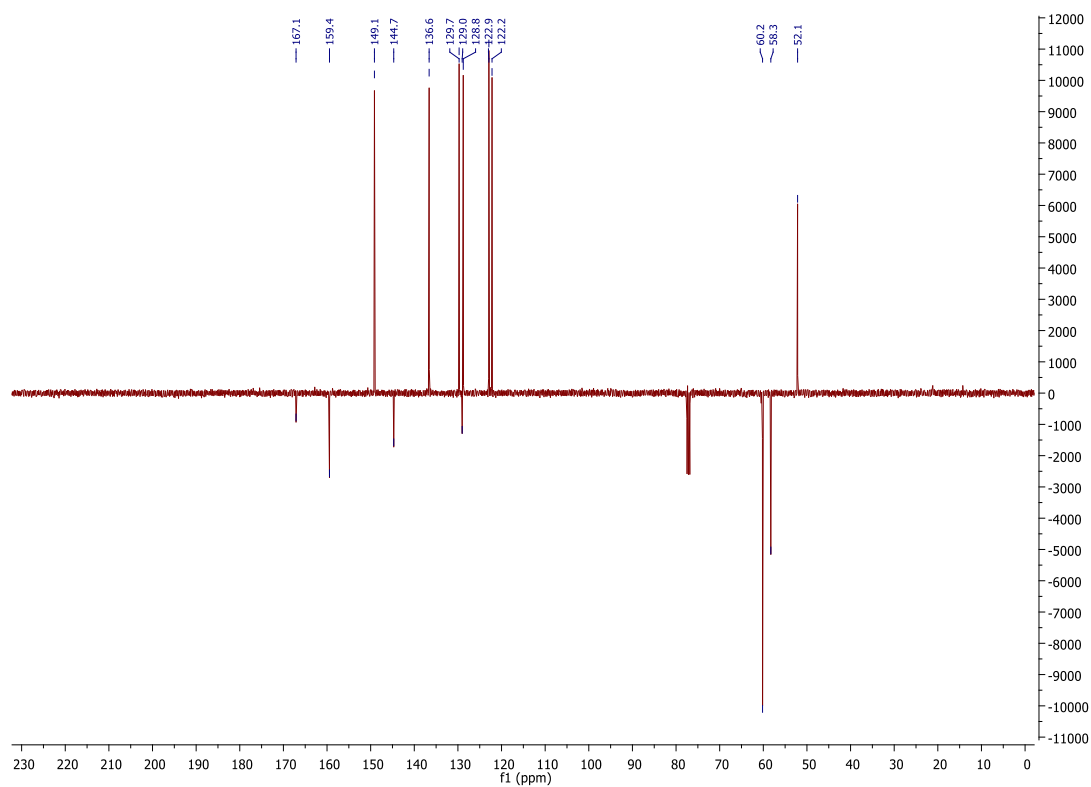

Methyl 4-((bis((6-methylpyridin-2-yl)methyl)amino)methyl)benzoate  
<sup>1</sup>H NMR (400 MHz, CDCl<sub>3</sub>)

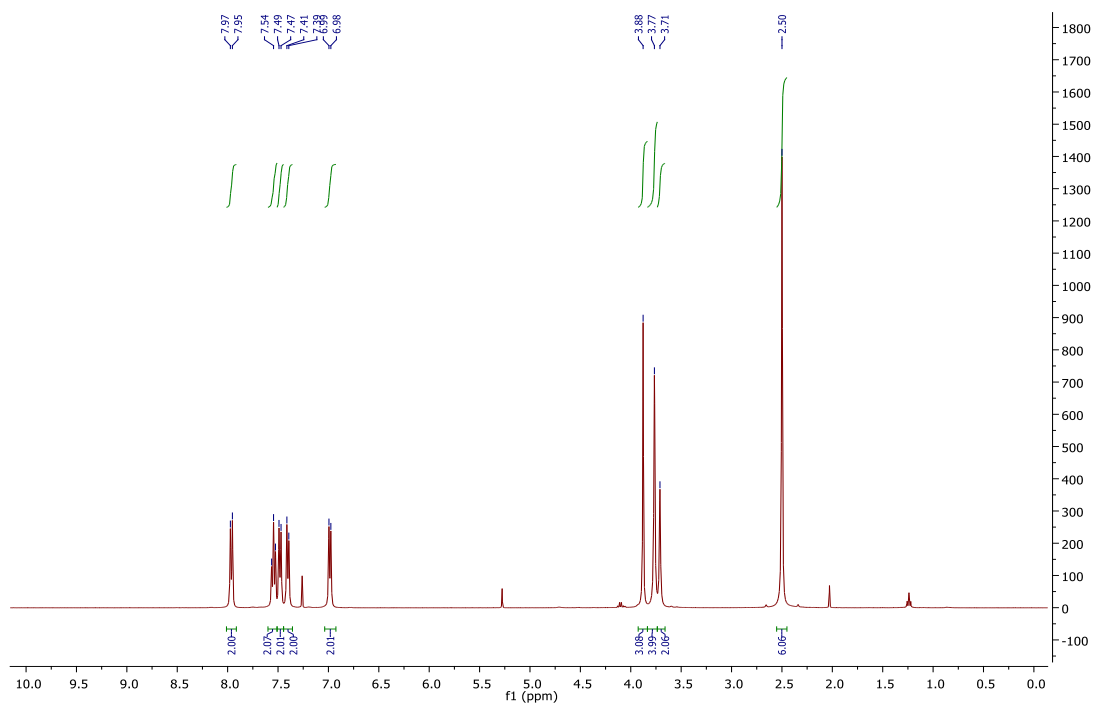

<sup>13</sup>C NMR (101 MHz, CDCl<sub>3</sub>)

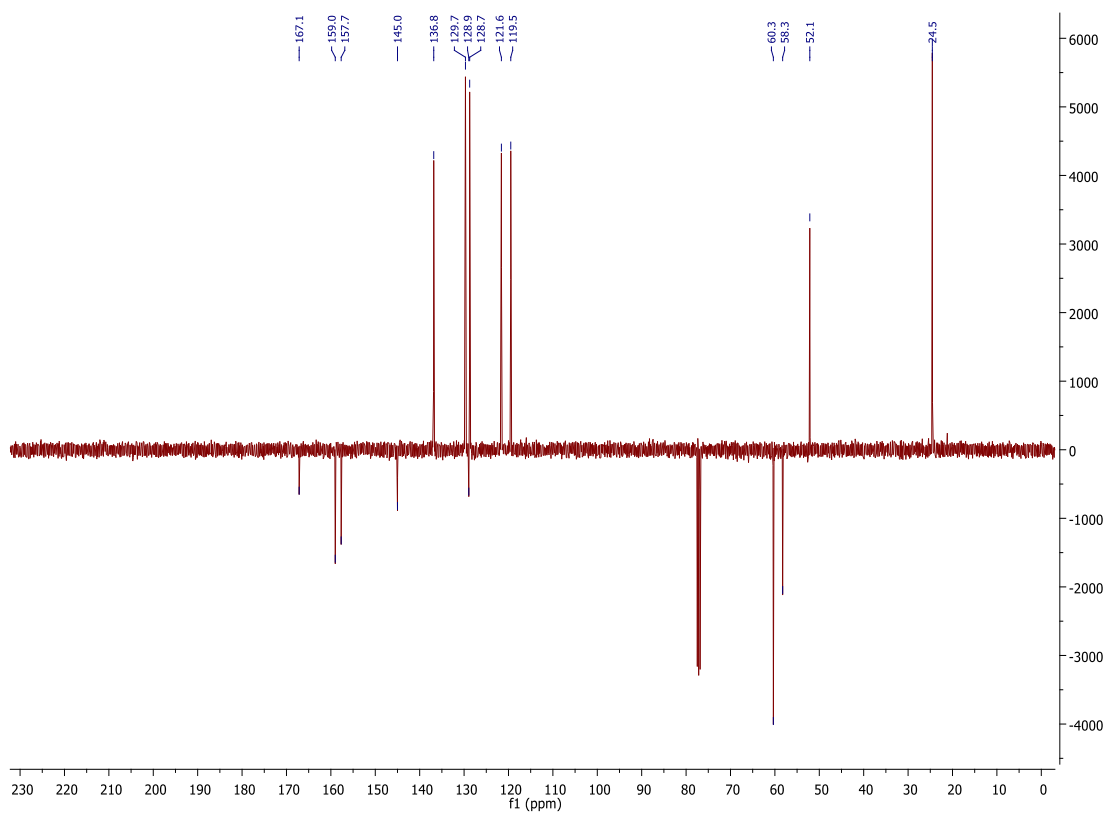

Methyl 4-((bis((6-((tert-butoxycarbonyl)amino)pyridin-2-yl)methyl)amino)methyl)-benzoate

$^1\text{H}$  NMR (400 MHz,  $\text{CDCl}_3$ )

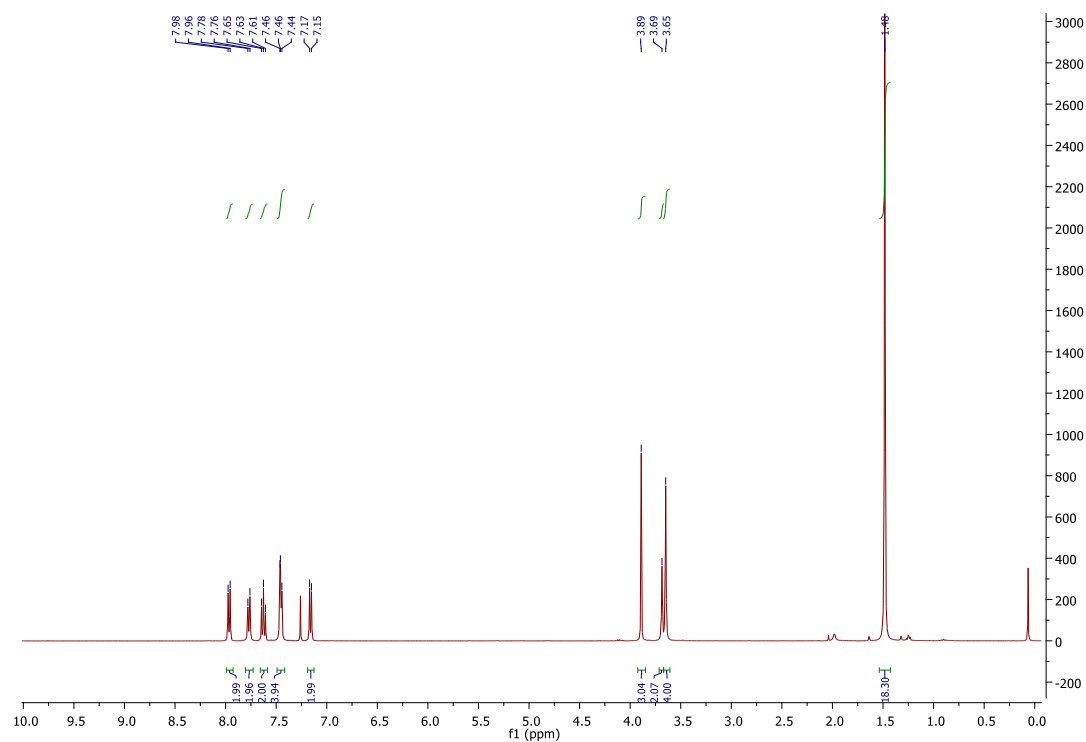

$^{13}\text{C}$  NMR (101 MHz,  $\text{CDCl}_3$ )

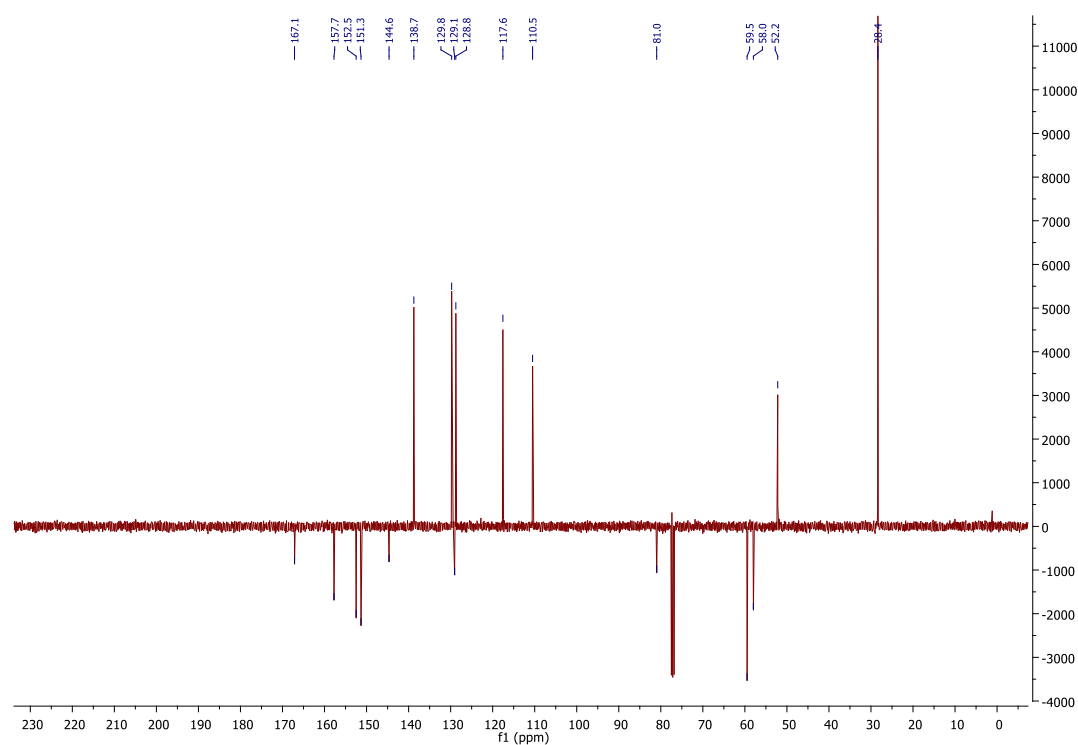

4-((bis(pyridin-2-ylmethyl)amino)methyl)benzoic acid **9**  
<sup>1</sup>H NMR (400 MHz, DMSO-d<sub>6</sub>)

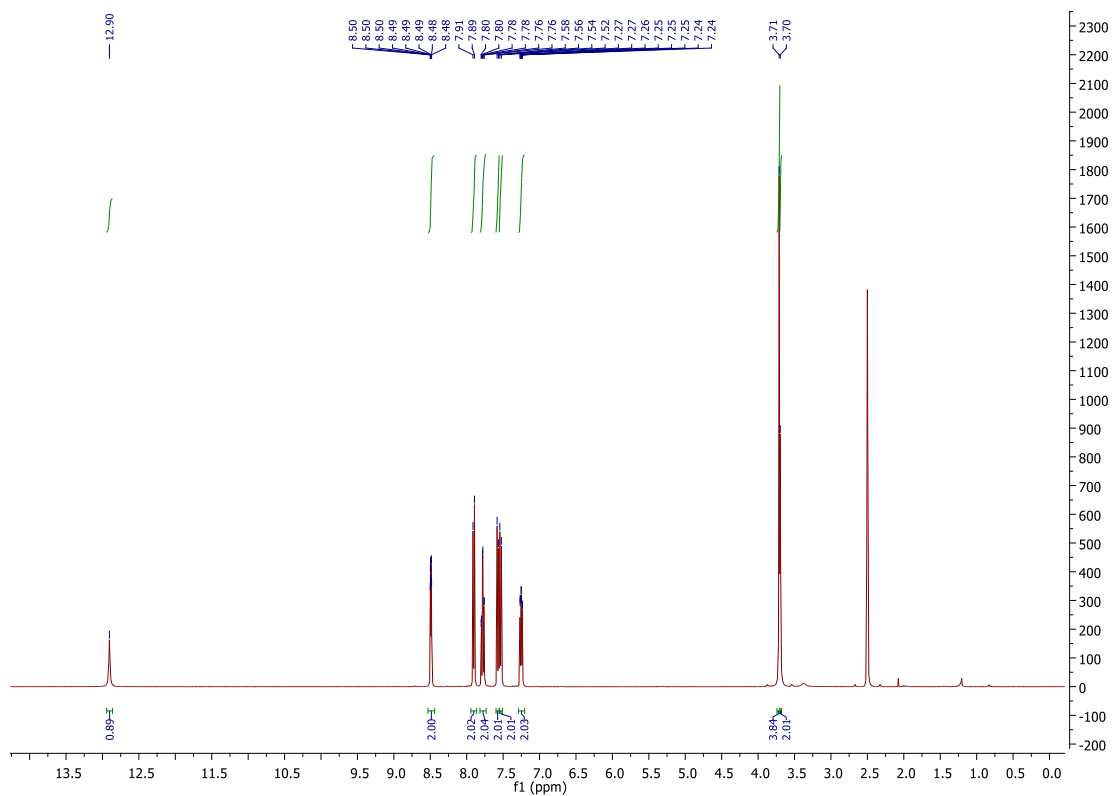

<sup>13</sup>C NMR (101 MHz, DMSO-d<sub>6</sub>)

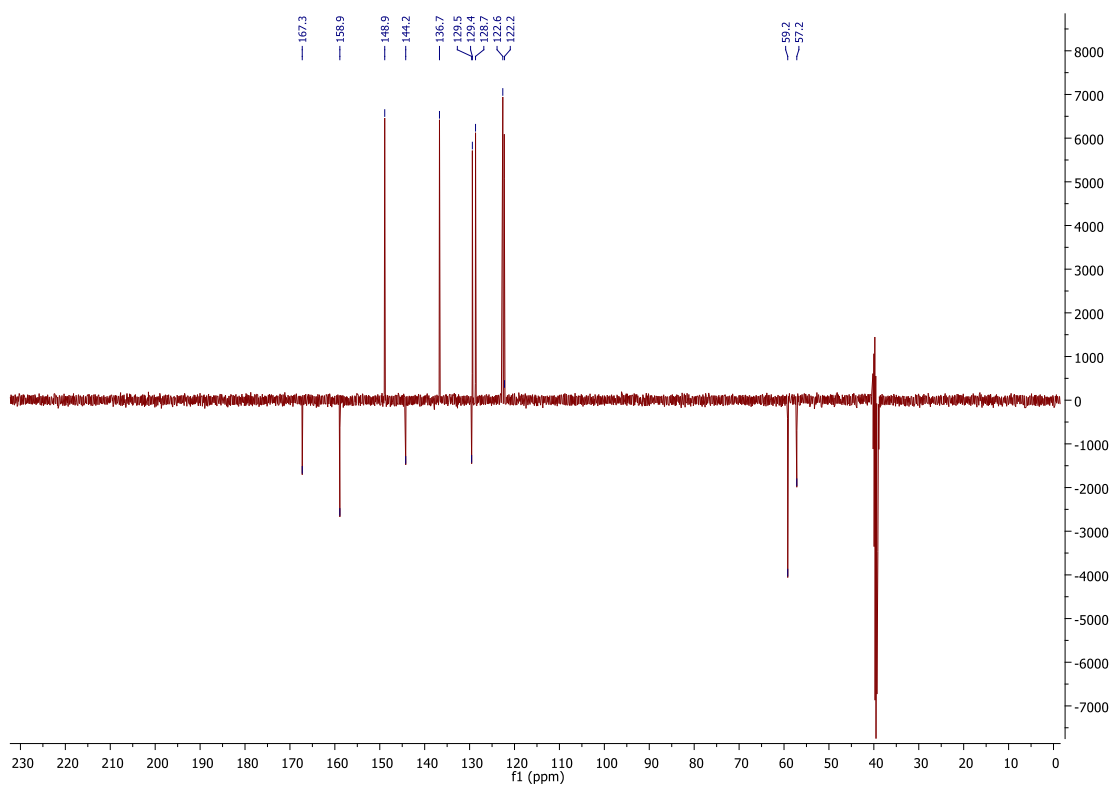



4-((bis((6-methylpyridin-2-yl)methyl)amino)methyl)benzoic acid **10**  
<sup>1</sup>H NMR (400 MHz, DMSO-d<sub>6</sub>)

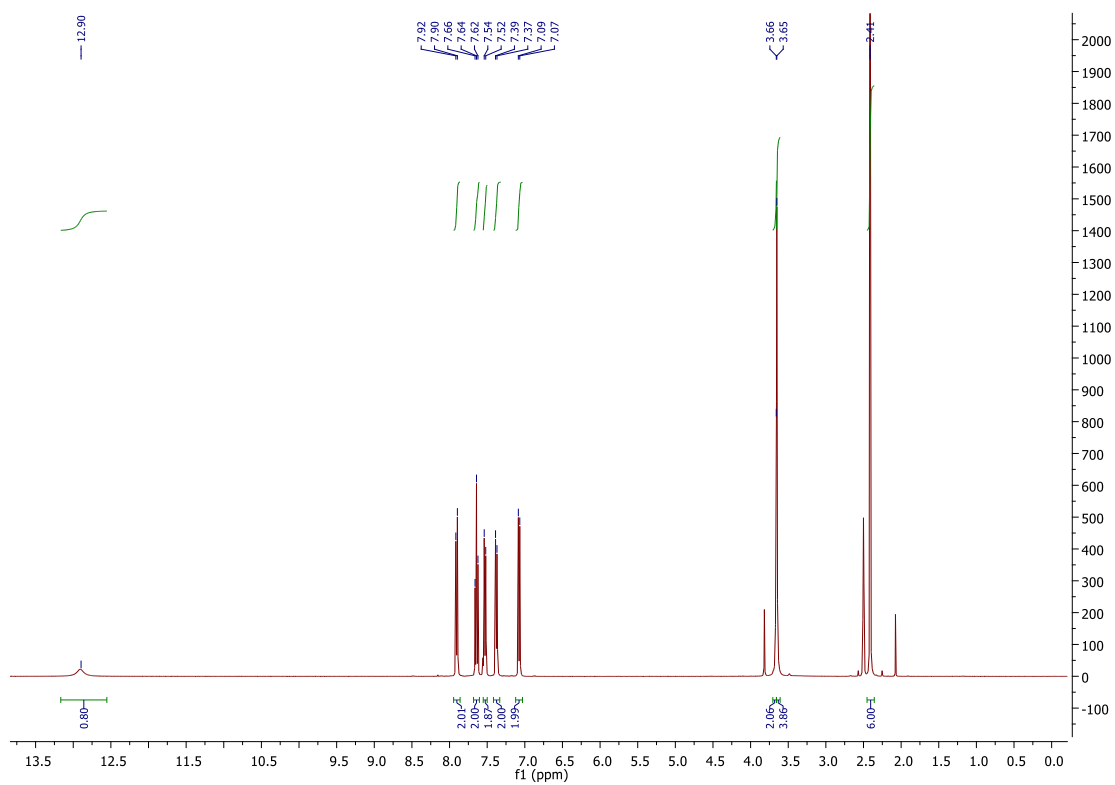

<sup>13</sup>C NMR (101 MHz, DMSO-d<sub>6</sub>)

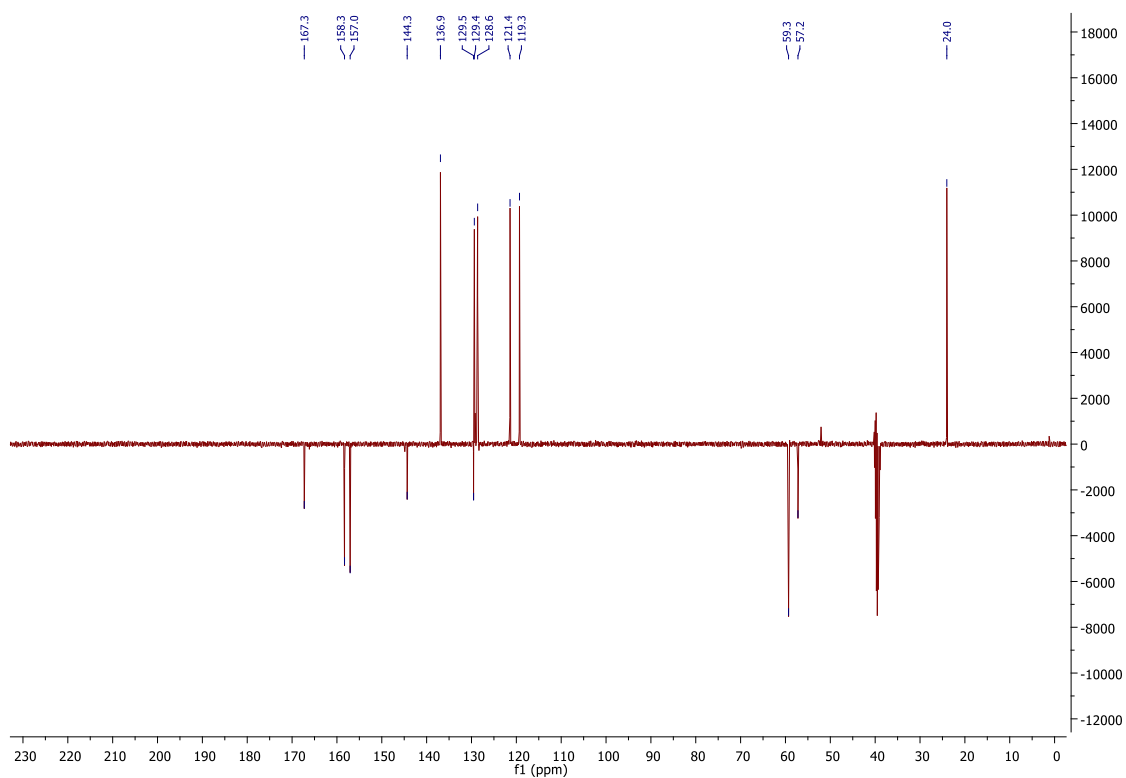

4-((bis((6-((tert-butoxycarbonyl)amino)pyridin-2-yl)methyl)amino)methyl)benzoic acid  
**11**  $^1\text{H}$  NMR (400 MHz, MeOD- $d_4$ )

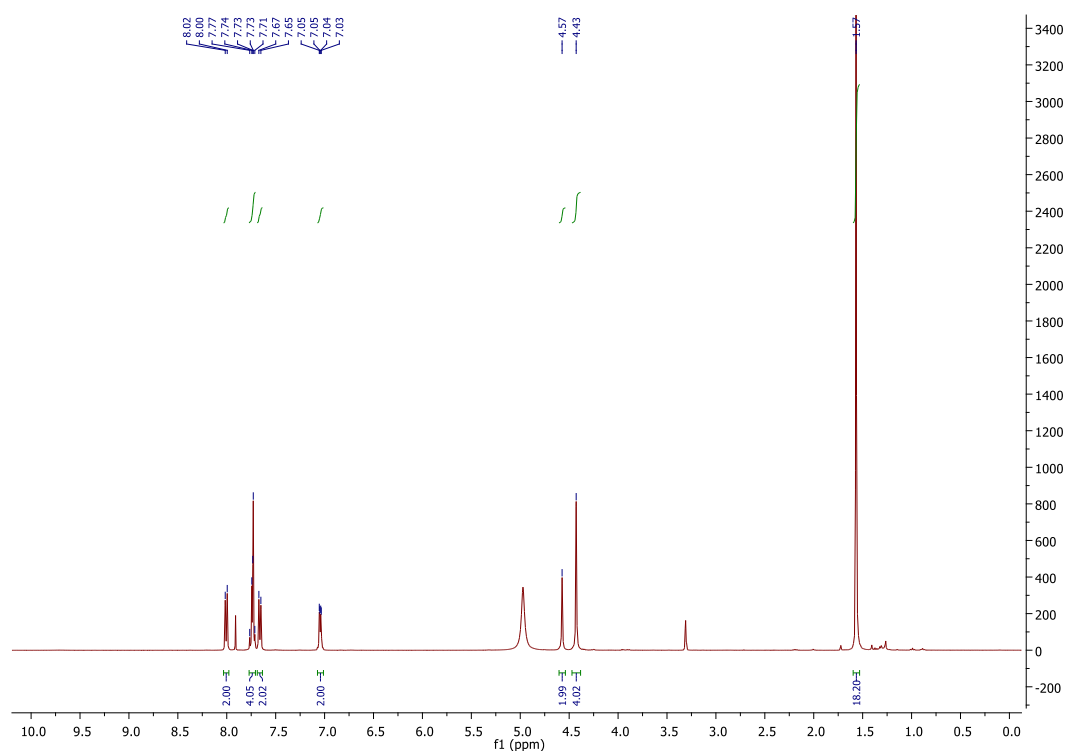

$^{13}\text{C}$  NMR (101 MHz, MeOD- $d_4$ )

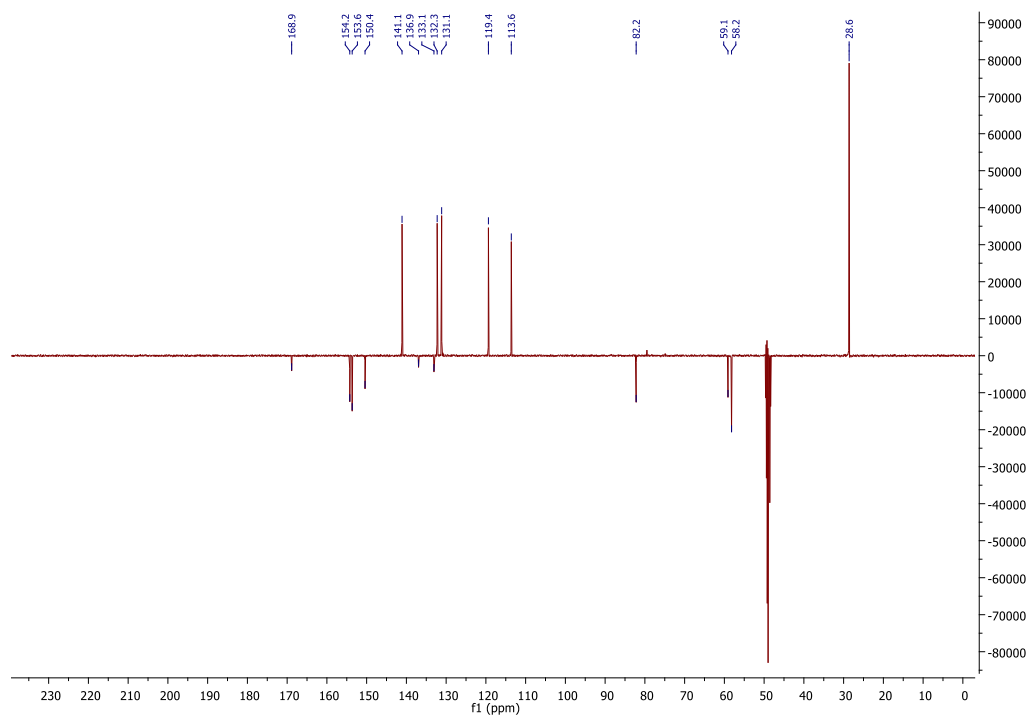

4-((bis(pyridin-2-ylmethyl)amino)methyl)-N-methylbenzamide **12**  
<sup>1</sup>H NMR (400 MHz, CDCl<sub>3</sub>)

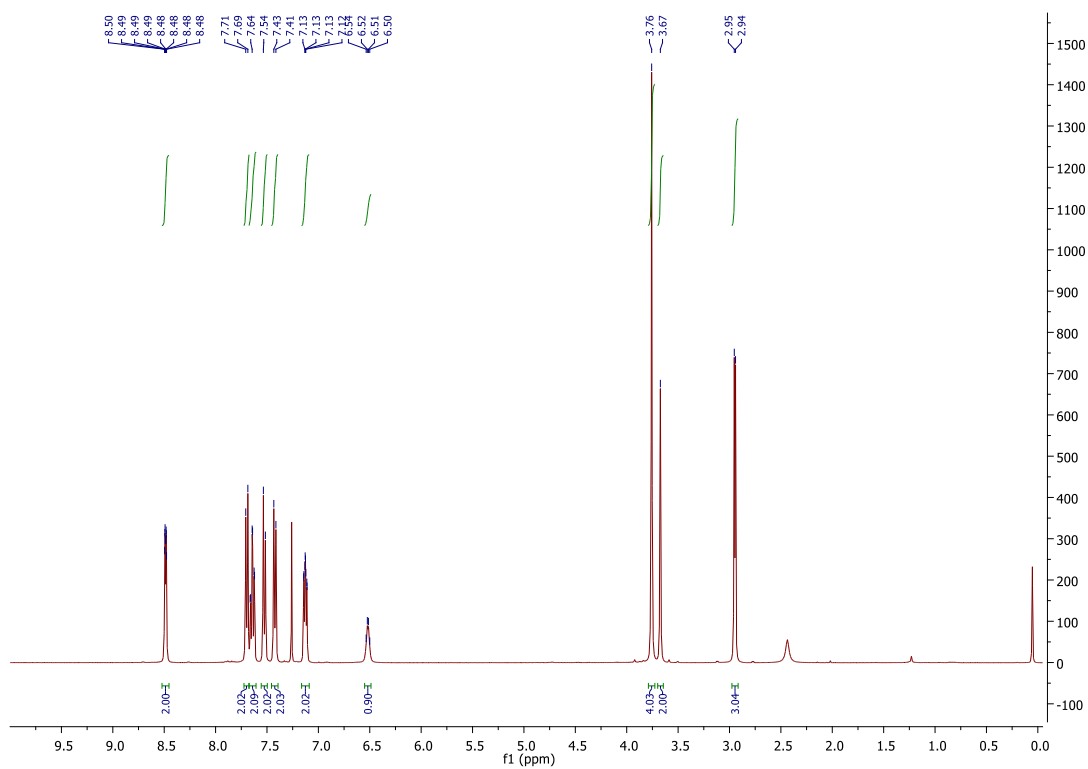

<sup>13</sup>C NMR (101 MHz, CDCl<sub>3</sub>)

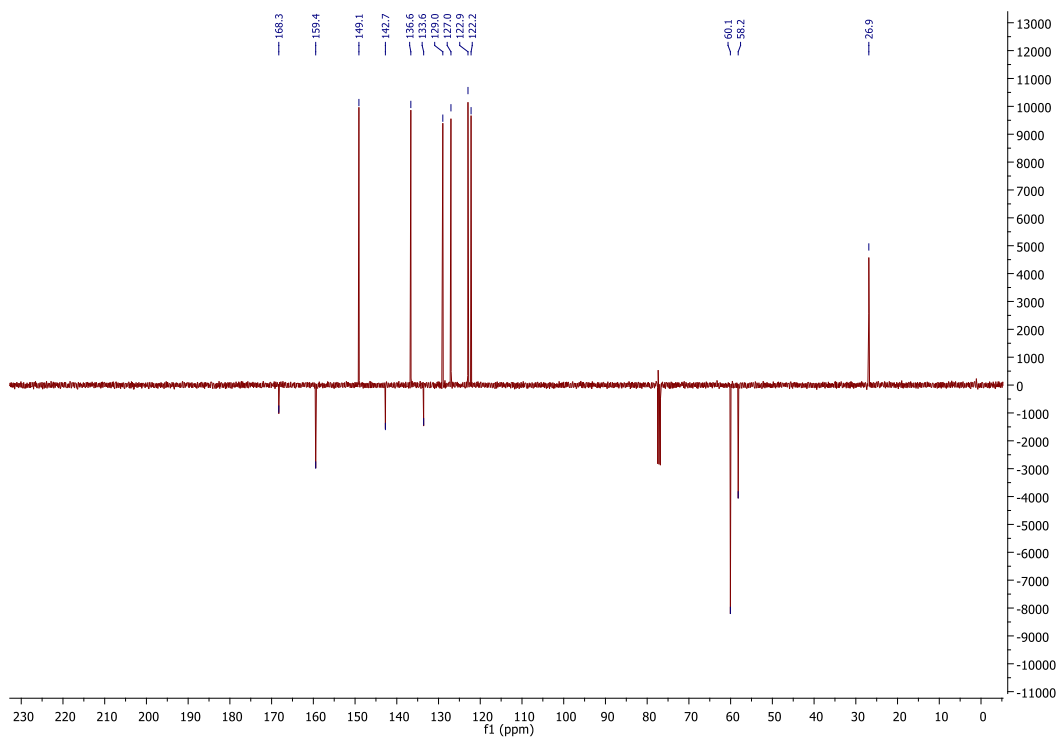

4-((bis((6-methylpyridin-2-yl)methyl)amino)methyl)-N-methylbenzamide **13**  
 $^1\text{H}$  NMR (400 MHz,  $\text{CDCl}_3$ )

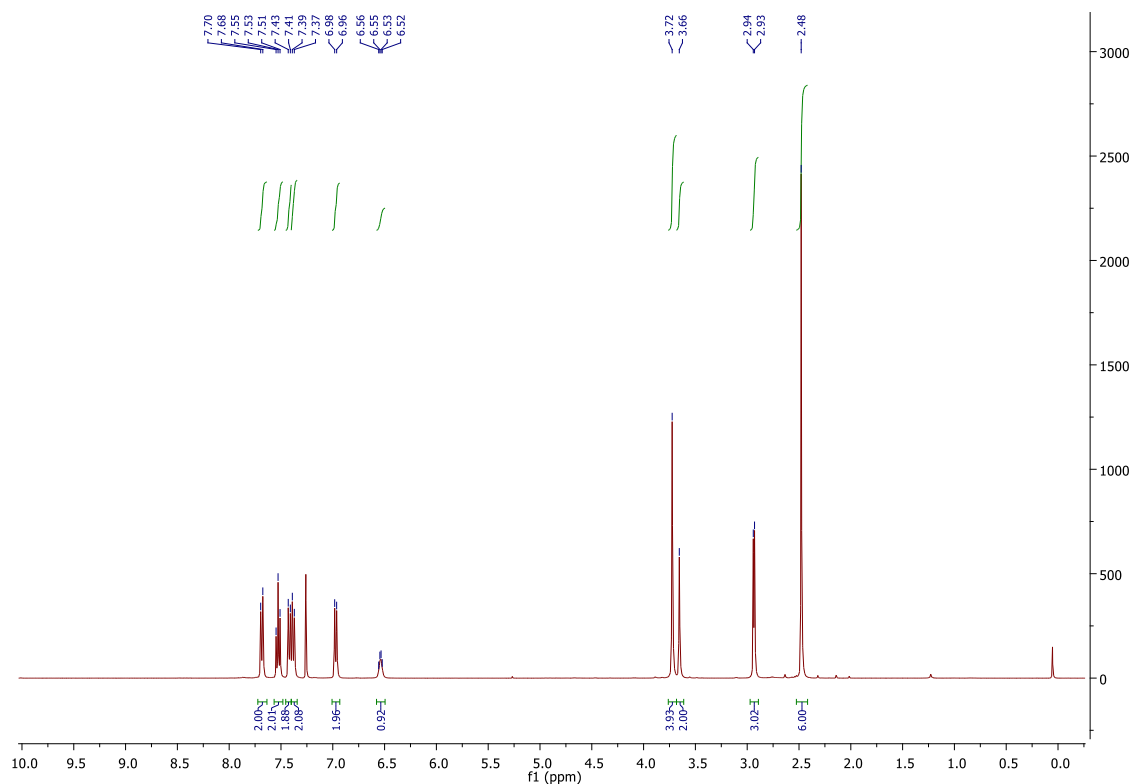

$^{13}\text{C}$  NMR (101 MHz,  $\text{CDCl}_3$ )

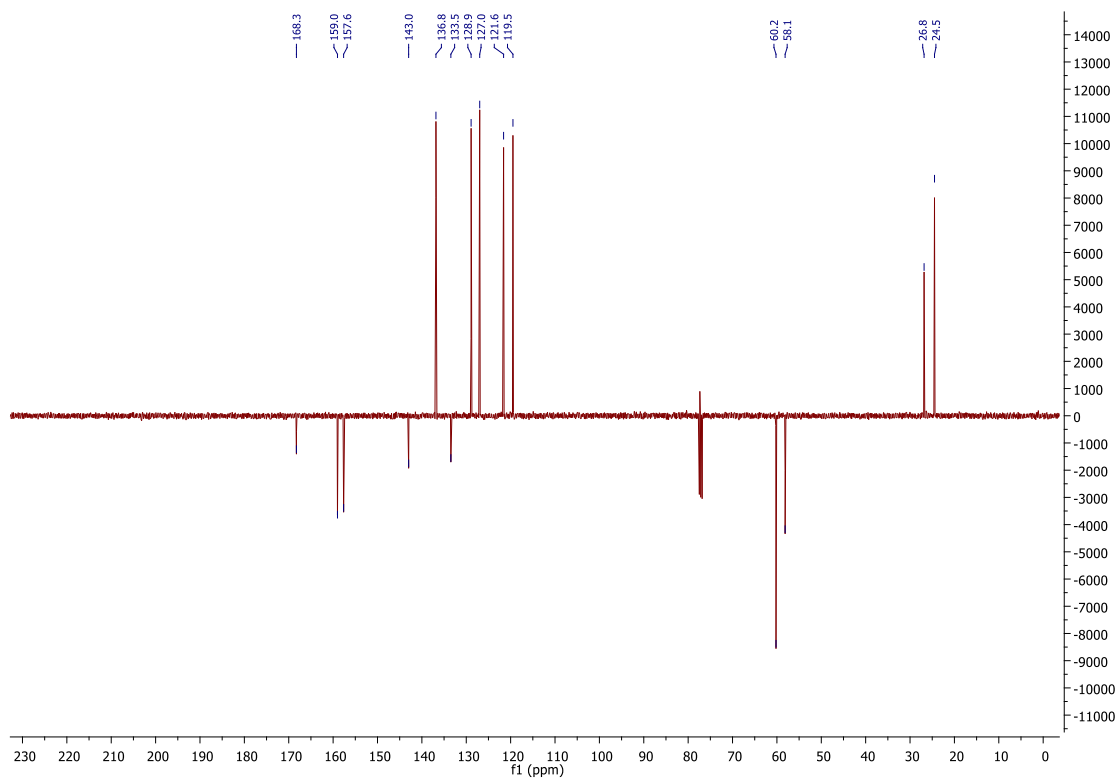

di-tert-butyl (((4-(methylcarbamoyl)benzyl)azanediyl)bis(methylene))bis(pyridine-6,2-diyl))dicarbamate  
<sup>1</sup>H NMR (400 MHz, CDCl<sub>3</sub>)

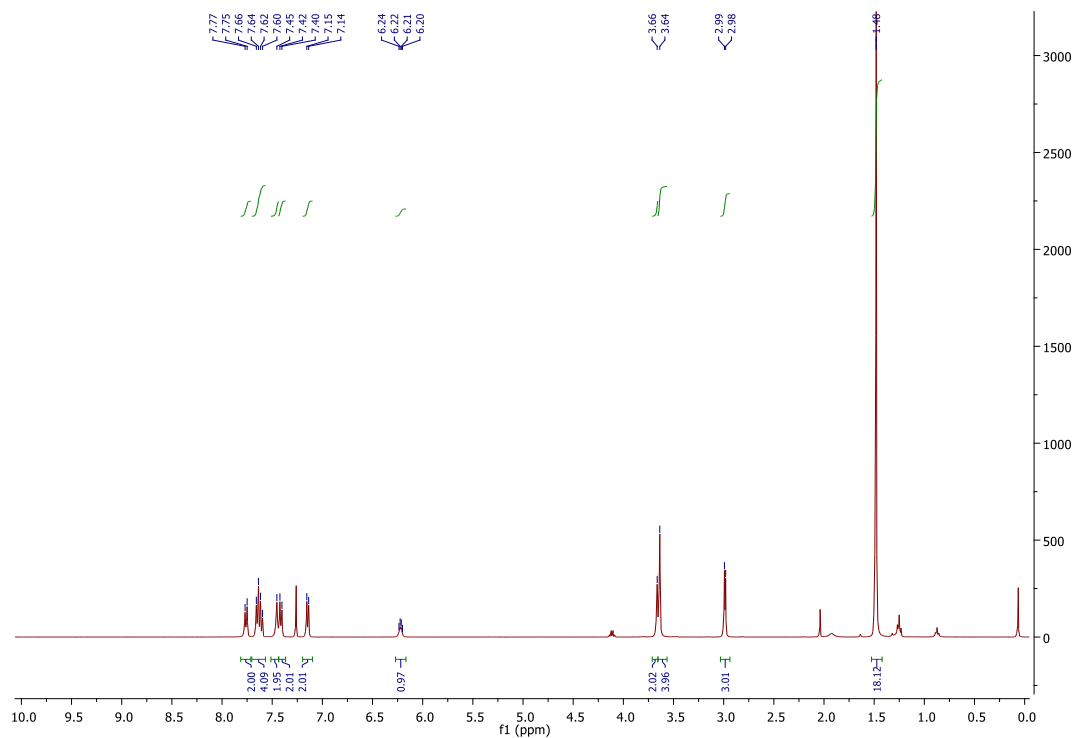

<sup>13</sup>C NMR (101 MHz, CDCl<sub>3</sub>)

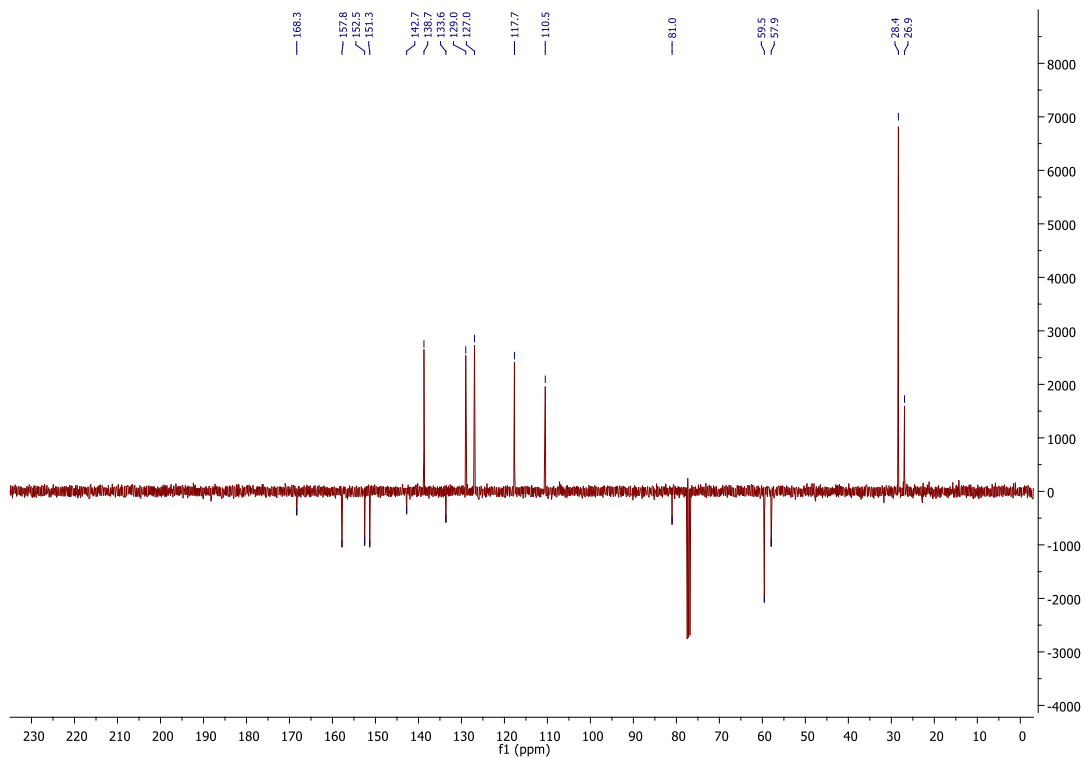

4-((bis((6-aminopyridin-2-yl)methyl)amino)methyl)-N-methylbenzamide **14**  
<sup>1</sup>H NMR (400 MHz, MeOD-d<sub>4</sub>)

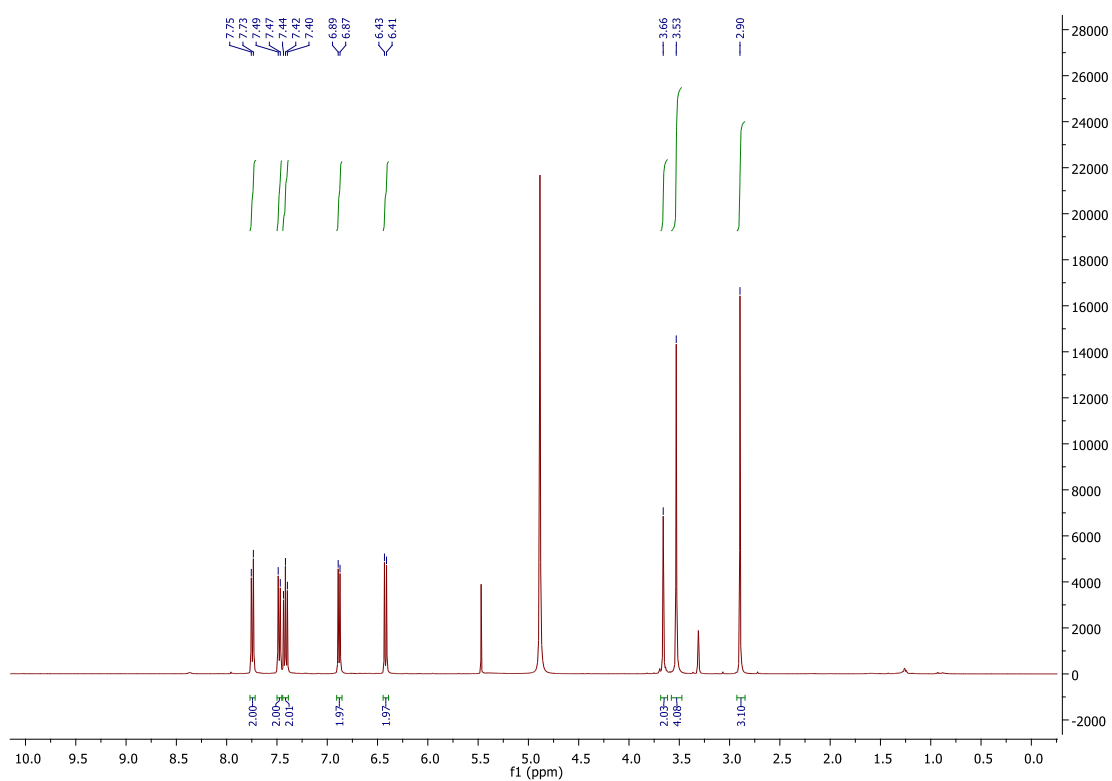

<sup>13</sup>C NMR (101 MHz, MeOD-d<sub>4</sub>)

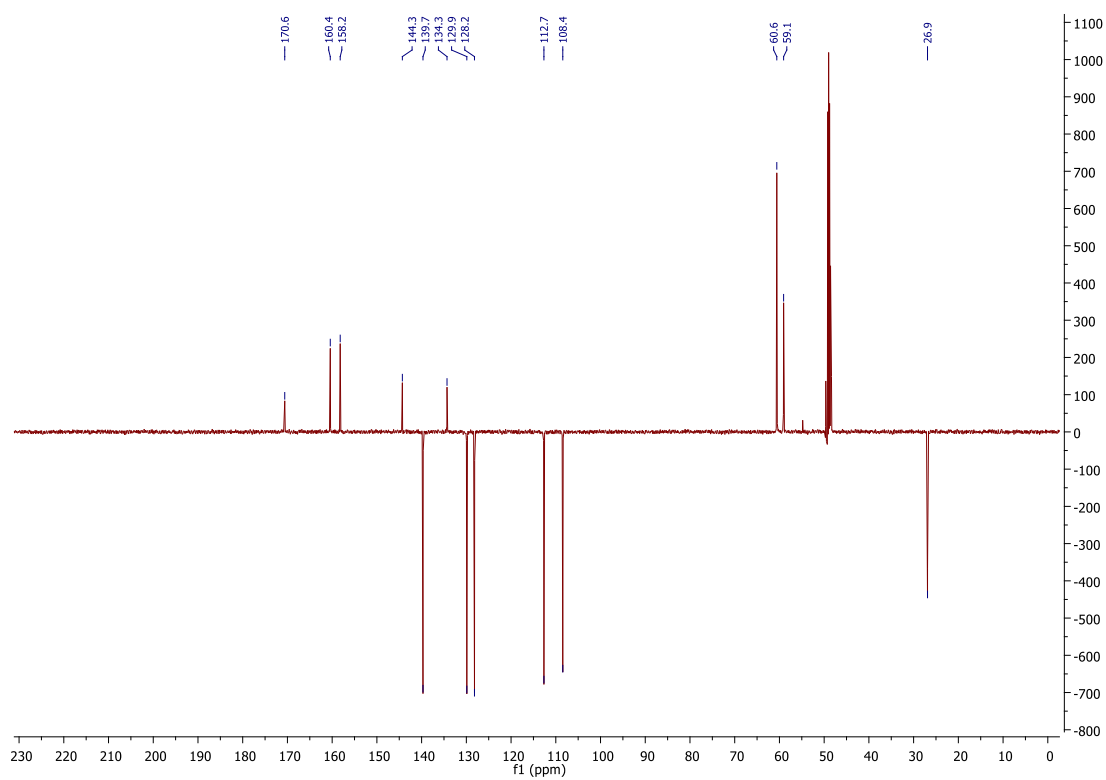

## Metal complex formation

### 4-((bis(pyridin-2-ylmethyl)amino)methyl)-N-methylbenzamide **12** · ZnCl<sub>2</sub> Complex

The ligand (1eq) was taken up in a small vial and a small amount of methanol was added to dissolve the ligand. ZnCl<sub>2</sub> (1.1eq) was weight out in a small vial and dissolved in a small amount of methanol. This solution was slowly added to the first solution. The methanolic mixture was placed in a closed system containing diethyl ether and left to crystallise (diffusion crystallisation). The white crystals were isolated and washed with Et<sub>2</sub>O giving crystals suitable for X-ray studies.

### 4-((bis((6-methylpyridin-2-yl)methyl)amino)methyl)-N-methylbenzamide **13** · ZnCl<sub>2</sub> Complex

The ligand (1 eq) was taken up in a small vial and a small amount of methanol was added to dissolve the ligand. ZnCl<sub>2</sub> (1.1 eq) was weight out in a small vial and dissolved in a small amount of methanol. This solution was slowly added to the first solution giving a white crystalline solid within seconds after addition. The solid was isolated and washed with Et<sub>2</sub>O giving crystals suitable for X-ray studies.

### 4-((bis((6-aminopyridin-2-yl)methyl)amino)methyl)-N-methylbenzamide **14** · ZnCl<sub>2</sub> Complex

The ligand (1 eq) was taken up in a small vial and a small amount of methanol was added to dissolve the ligand. ZnCl<sub>2</sub> (1.1 eq) was weight out in a small vial and dissolved in a small amount of methanol. This solution was slowly added to the first solution. The methanolic mixture was placed in a closed system containing diethyl ether and left to crystallise (diffusion crystallisation). The slightly yellow crystals were isolated and washed with Et<sub>2</sub>O giving crystals suitable for X-ray studies.

## Synthesis of PNA conjugates

### PNAzyme 3 (PNA-ligand-NH<sub>2</sub>)

The Resin-PNA (5.7 mg; 1 eq) was placed in a reactor containing a bottom filter, and the MTT group was removed by repetitive washes of the resin with TFA/DCM (1:99) solution. The wash was continued for approximately 1min until a clear and colourless cleaving phase was observed (bright yellow becoming colourless). The resin was then washed with DCM, NMP and NMP+NMM followed by NMP.

The ligand (9.5 mg; 25 eq) and HATU (5.9 mg; 23 eq) were taken up in NMP (80 ul) and DIPEA (5.4 ul; 46 eq) was added. The pre-activation was left to react for 1h at RT. The preactivated solution was added to the washed and deprotected resin and left to react for 1.5h at RT. The resin was then washed with NMP (10x2 ml) and DCM (10x2 ml).

The PNA conjugate was fully deprotected and cleaved off the solid support by use of a cleavage mixture containing TFA/H<sub>2</sub>O/TIS (95:2.5:2.5) (1 ml) for 90 min at RT. The cleavage mixture was collected and evaporated *in vacuo* over N<sub>2</sub> stream. Water (1.5 ml) was added and the water phase was washed with Et<sub>2</sub>O (2x1.5 ml). The water

phase was then evaporated *in vacuo* before taken up in MilliQ water and purified by RP-HPLC.

MALDI: m/z [M+H]<sup>+</sup> calcd for [C<sub>150</sub>H<sub>188</sub>N<sub>74</sub>O<sub>38</sub> + H<sup>+</sup>]: 3635.5160; Found: 3637.4154

#### PNAzyme 2 (PNA-ligand-Me)

The Resin-PNA (5.8mg; 1eq) was placed in a reactor containing a bottom filter, and the MTT group was removed by repetitive washes of the resin with TFA/DCM (1:99) solution. The wash was continued for approximately 1min until a clear and colourless cleaving phase was observed (bright yellow becoming colourless). The resin was then washed with DCM, NMP and NMP+NMM followed by NMP.

The ligand (6.3mg; 25eq) and HATU (5.9mg; 23eq) were taken up in NMP (80ul) and DIPEA (5.4ul; 46eq) was added. The pre-activation was left to react for 1h at RT. The preactivated solution was added to the washed and deprotected resin and left to react for 1.5h at RT. The resin was then washed with NMP (10x2ml) and DCM (10x2ml).

The PNA conjugate was fully deprotected and cleaved off the solid support by use of a cleavage mixture containing TFA/H<sub>2</sub>O/TIS (95:2.5:2.5) (1ml) for 90min at RT. The cleavage mixture was collected and evaporated *in vacuo* over N<sub>2</sub> stream. Water (1.5ml) was added and the water phase was washed with Et<sub>2</sub>O (2x1.5ml). The water phase was then evaporated *in vacuo* before taken up in MilliQ water and purified by RP-HPLC.

MALDI: m/z [M+H]<sup>+</sup> calcd for [C<sub>152</sub>H<sub>190</sub>N<sub>72</sub>O<sub>38</sub> + H<sup>+</sup>]: 3633.5255; Found: 3634.2500

#### PNAzyme 1 (PNA-ligand-H):

The Resin-PNA (5.6 mg; 1eq) was placed in a reactor containing a bottom filter, and the MTT group was removed by repetitive washes of the resin with TFA/DCM (1:99) solution. The wash was continued for approximately 1min until a clear and colourless cleaving phase was observed (bright yellow becoming colourless). The resin was then washed with DCM, NMP and NMP+NMM followed by NMP.

The ligand (5.6 mg; 25eq) and HATU (5.9 mg; 23eq) were taken up in NMP (80 ul) and DIPEA (5.4 ul; 46eq) was added. The pre-activation was left to react for 1h at RT. The preactivated solution was added to the washed and deprotected resin and left to react for 1.5h at RT. The resin was then washed with NMP (10x2 ml) and DCM (10x2 ml).

The PNA conjugate was fully deprotected and cleaved off the solid support by use of a cleavage mixture containing TFA/H<sub>2</sub>O/TIS (95:2.5:2.5) (1 ml) for 90 min at RT. The cleavage mixture was collected and evaporated *in vacuo* over N<sub>2</sub> stream. Water (1.5 ml) was added and the water phase was washed with Et<sub>2</sub>O (2x1.5 ml). The water phase was then evaporated *in vacuo* before taken up in MilliQ water and purified by RP-HPLC.

MALDI: m/z [M+H]<sup>+</sup> calcd for [C<sub>150</sub>H<sub>186</sub>N<sub>72</sub>O<sub>38</sub> + H<sup>+</sup>]: 3605.4942; Found: 3606.2969



The PNAzymes were purified on Ascentis Express Supelco Peptide ES-C18 column (2.7  $\mu$ m, 150  $\times$  4.6 mm) with a linear gradient elution of 0% to 40% buffer B over 30 min at 60  $^{\circ}$ C, using a flow rate of 1.0 mL/min and UV detection at 260 nm. Solvent system used: solvent A: 0.1% TFA in water; solvent B: 50% MeCN: water containing 0.1% TFA. Collected products were evaporated to dryness and lyophilised from water ( $\times 3$ ). The final products were analysed by MALDI-MS in positive ion-mode using a sinapic acid matrix (10 mg/mL in 0.1% TFA/milliQ and MeCN (2:1, v/v)

## PNA Conjugate Purification

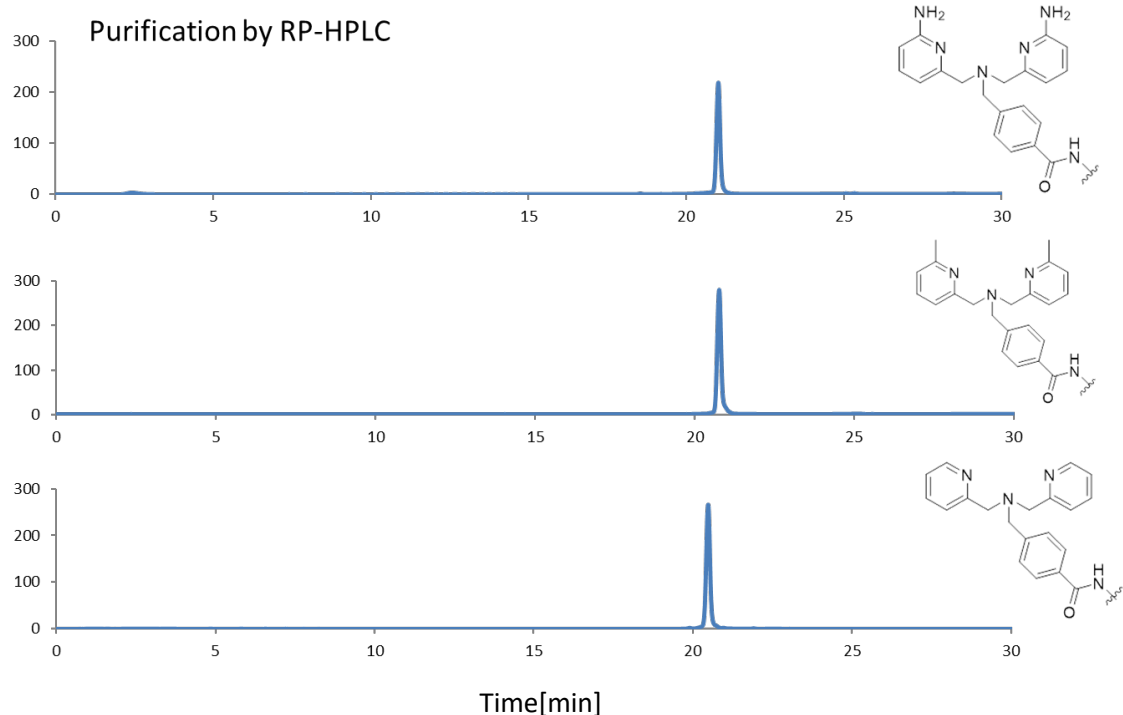

## MALDI of PNA conjugates

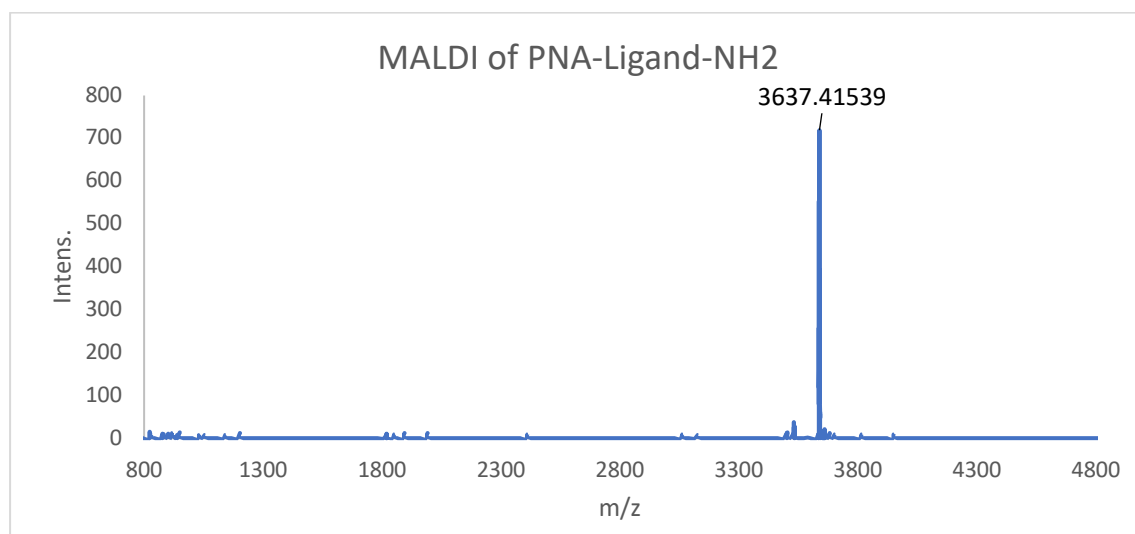

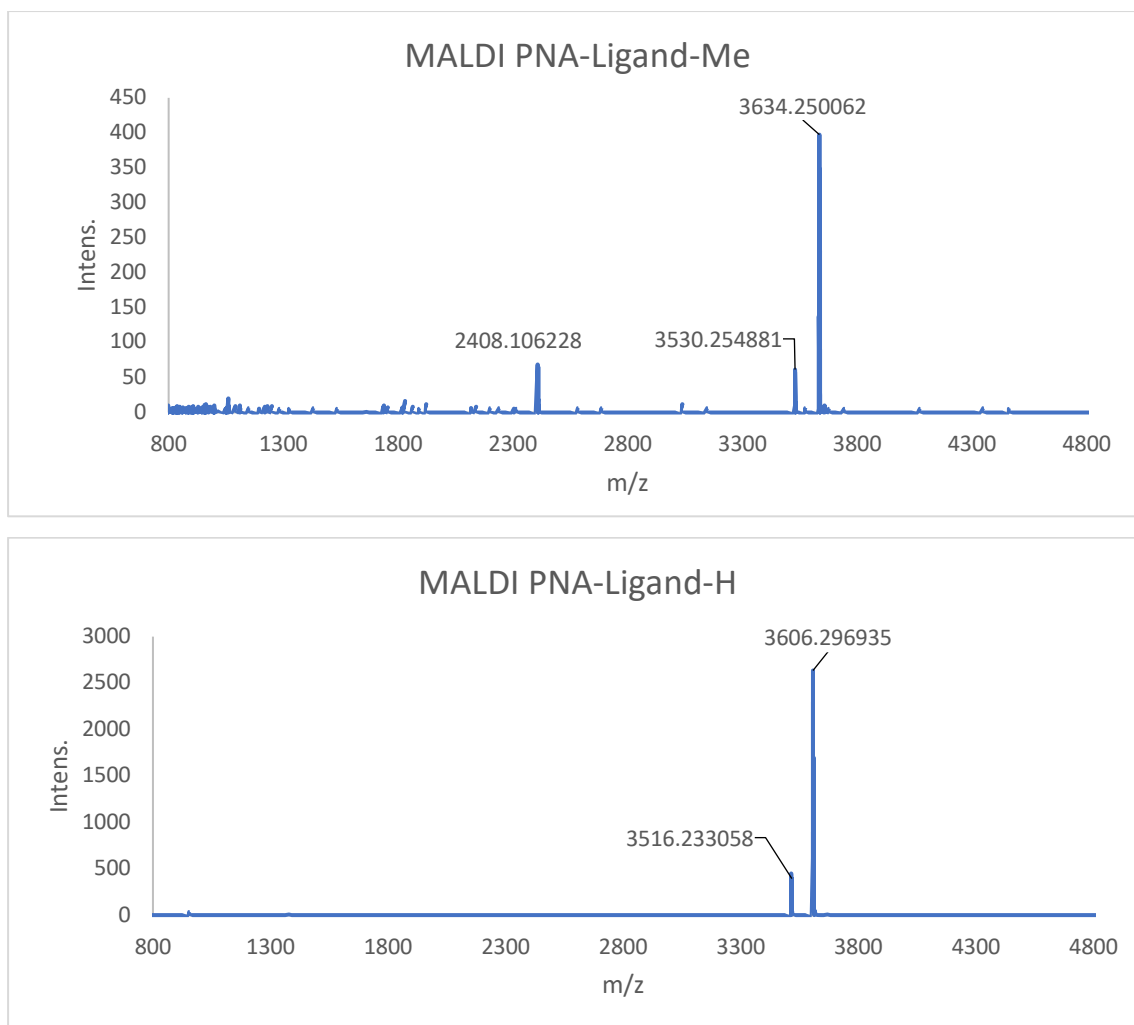

### Titration experiments

For the titration experiments, the following standard conditions were used for all experiments. All solutions used were freshly made from chemicals of analytical grade and milliQwater.

For titration of the ligand itself, the ligand (1eq; 0.02mmol) was taken up in NaCl (0.10M) (10000µl). HCl (1M) (40µl; 2eq) was added and the solution was placed in a water bath at 25°C. The solution was titrated with NaOH (0.2M) (10µl pr. Addition; 1/10 eq.). The stirring was turned on after each addition and the pH was allowed to stabilize before each measurement without stirring.

For titration of the ligand in presence of metal ion, the ligand (1eq; 0.02mmol) was taken up in NaCl (0.10M) + ZnCl<sub>2</sub> (2.0mM; 1eq) (10000µl). HCl (1M) (40µl; 2eq) was added and the solution was placed in a water bath at 25°C. The solution was titrated with NaOH (0.2M) (10µl pr. Addition; 1/10 eq.). The stirring was turned on after each addition and the pH was allowed to stabilize before each measurement without stirring.

## Speciation Curves

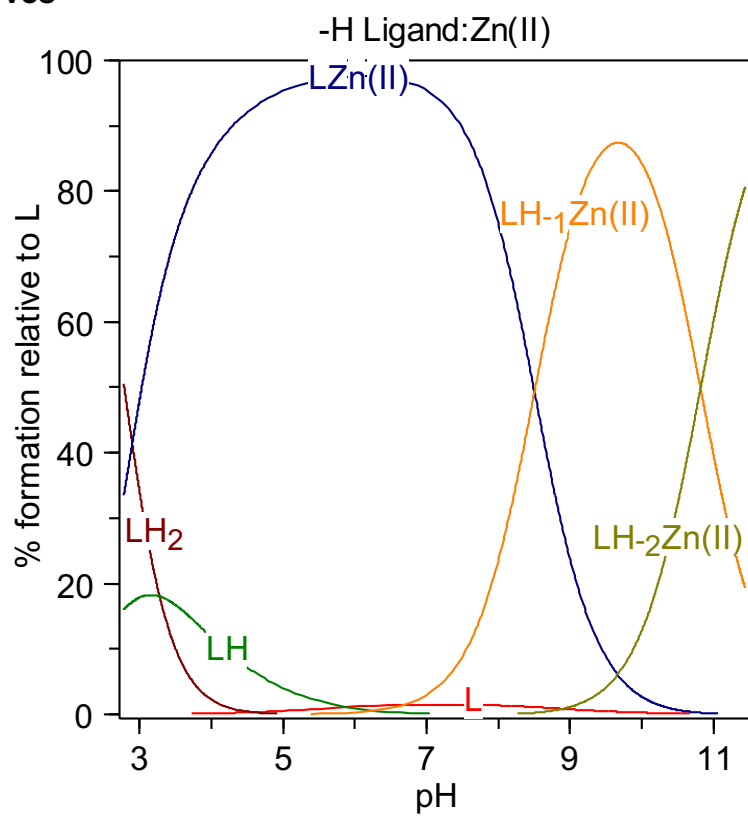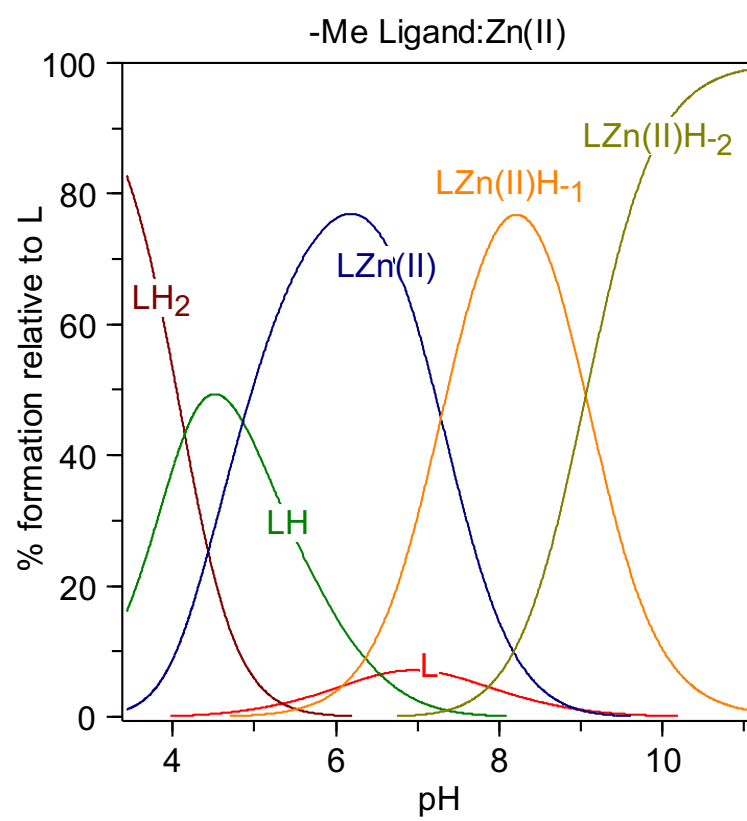

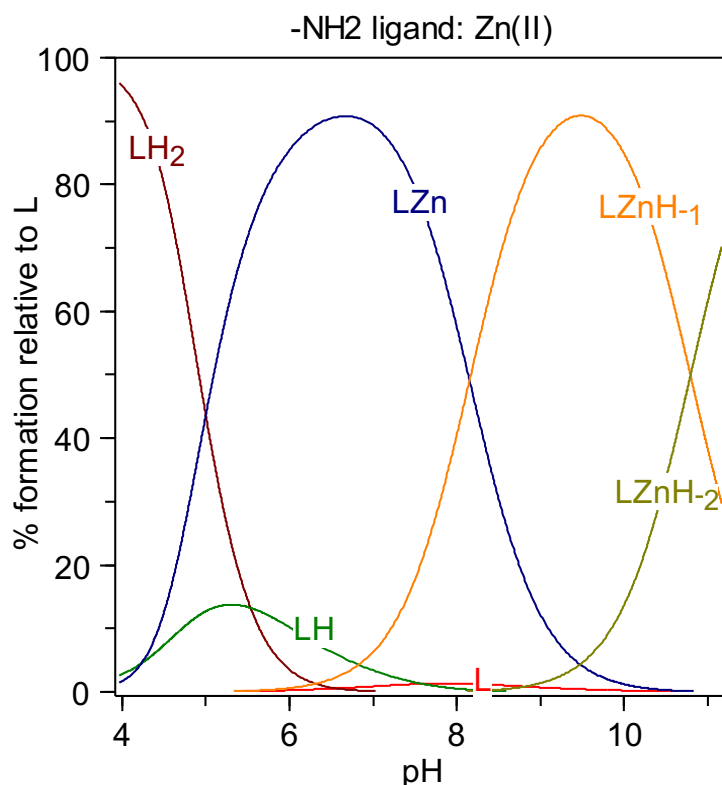

### The reaction of HPNPP

Stock solutions of HPNPP (5.0 mM), HEPES Buffer (0.1 M), Zn(II)Cl<sub>2</sub> or Zn(NO)<sub>2</sub> (50 mM) and the respective ligand (50 mM, DMSO) were prepared. Reaction mixtures were prepared directly in the cuvette by adding ligand, Zn(II), buffer and water giving a total volume of 2 ml and final concentrations of [HPNPP]= 0.05 mM and [HEPES]= 50 mM. The cuvettes were placed in the UV cell block to equilibrate. HPNPP was added as the last component and the complete reaction was followed at 400nm. For the faster reactions, the integrated first order rate equation was fitted to the increase in absorbance with time to obtain the observed first rate constant (*k*<sub>obs</sub>) for each reaction. For slower reactions, initial rate experiments followed the same procedure but with use of HPNPP stock- solution of 50mM and final concentrations of 5.0 mM. 2-5% of the reaction was followed. Data was fitted to straight lines and divided by the extinction coefficient  $\epsilon = 9575$  at pH 7.0.

### The reaction of PNAzymes

RNA cleavage reactions were carried out in sealed tubes immersed in a thermostated water bath (37 °C). Experiments were performed at pH 7.0 in HEPES buffer (10 mM HEPES, 0.1 M NaCl). RNA targets (4  $\mu$ M final concentration, 1eq) were equilibrated in appropriate amounts of water and HEPES buffer over a 15-minute period at 37 °C prior to the addition of Zn(II) solution (100  $\mu$ M final concentration) and 1.3 eq. of the PNAzyme. The reaction mixtures were then allowed to incubate at 37 °C. Aliquots (40  $\mu$ L) were withdrawn at 3h, 6h, 24h, 48h, 72h and 96h time points and immediately quenched with 70  $\mu$ L of 1.0 mM EDTA in 30% MeCN/milliQ. The samples were analysed by anion exchange HPLC (IE-HPLC) using a Dionex NucleoPac PA-100 (4  $\times$  250 mm) column with a linear gradient elution of 0–45% buffer B over 30 min at 60

°C. A flow rate of 1.5 mL/min was used and UV detection was carried out at 260 nm. The following solvent system was used: (A) 20 mM NaOAc in 30% aq. MeCN; and (B) 20 mM NaOAc, 0.4 M LiClO<sub>4</sub> in 30% aq. MeCN. Cleavage of RNA substrates was obtained by quantification of the remaining RNA and the sum of the formed fragments detected in the IE-HPLC analysis.

# ONW144s\_(12.Zn)

**Table S1 Crystal data and structure refinement for ONW144s\_.**

|                                                |                                                                    |
|------------------------------------------------|--------------------------------------------------------------------|
| Identification code                            | ONW144s_                                                           |
| Empirical formula                              | C <sub>21</sub> H <sub>22</sub> Cl <sub>2</sub> N <sub>4</sub> OZn |
| Formula weight                                 | 482.69                                                             |
| Temperature/K                                  | 100                                                                |
| Crystal system                                 | orthorhombic                                                       |
| Space group                                    | Pbca                                                               |
| a/Å                                            | 12.5333(9)                                                         |
| b/Å                                            | 17.5056(12)                                                        |
| c/Å                                            | 19.2519(14)                                                        |
| $\alpha/^\circ$                                | 90                                                                 |
| $\beta/^\circ$                                 | 90                                                                 |
| $\gamma/^\circ$                                | 90                                                                 |
| Volume/Å <sup>3</sup>                          | 4223.9(5)                                                          |
| Z                                              | 8                                                                  |
| $\rho_{\text{calc}}/\text{g}/\text{cm}^3$      | 1.518                                                              |
| $\mu/\text{mm}^{-1}$                           | 1.436                                                              |
| F(000)                                         | 1984.0                                                             |
| Crystal size/mm <sup>3</sup>                   | 0.5 × 0.3 × 0.3                                                    |
| Radiation                                      | MoK $\alpha$ ( $\lambda$ = 0.71073)                                |
| 2 $\Theta$ range for data collection/ $^\circ$ | 4.232 to 57.212                                                    |
| Index ranges                                   | -16 ≤ h ≤ 16, -20 ≤ k ≤ 23, -24 ≤ l ≤ 25                           |
| Reflections collected                          | 69597                                                              |
| Independent reflections                        | 5392 [ $R_{\text{int}}$ = 0.0277, $R_{\text{sigma}}$ = 0.0160]     |
| Data/restraints/parameters                     | 5392/1/267                                                         |
| Goodness-of-fit on F <sup>2</sup>              | 1.073                                                              |
| Final R indexes [ $I \geq 2\sigma(I)$ ]        | $R_1$ = 0.0271, $wR_2$ = 0.0643                                    |
| Final R indexes [all data]                     | $R_1$ = 0.0371, $wR_2$ = 0.0690                                    |
| Largest diff. peak/hole / e Å <sup>-3</sup>    | 0.42/-0.45                                                         |

**Table S2 Fractional Atomic Coordinates ( $\times 10^4$ ) and Equivalent Isotropic Displacement Parameters (Å<sup>2</sup> $\times 10^3$ ) for ONW144s\_.  $U_{\text{eq}}$  is defined as 1/3 of the trace of the orthogonalised  $U_{ij}$  tensor.**

| Atom | x         | y         | z         | U(eq)    |
|------|-----------|-----------|-----------|----------|
| Zn1  | 1629.3(2) | 2523.8(2) | 6395.7(2) | 14.20(6) |
| Cl1  | 1264.2(3) | 1825.3(2) | 7354.8(2) | 22.36(9) |
| Cl2  | 467.7(3)  | 2451.6(2) | 5485.5(2) | 17.93(8) |
| O1   | 7845.3(9) | 5539.5(7) | 6008.8(7) | 23.1(3)  |

|     |            |            |           |         |
|-----|------------|------------|-----------|---------|
| N1  | 2860.9(10) | 1798.9(7)  | 5956.7(7) | 14.9(3) |
| N2  | 1128.5(11) | 3662.8(8)  | 6706.2(7) | 18.7(3) |
| N3  | 3133.9(10) | 3132.5(7)  | 6597.2(7) | 14.8(3) |
| N4  | 6650.2(11) | 6501.5(8)  | 5928.3(8) | 19.2(3) |
| C1  | 2733.1(13) | 1259.7(9)  | 5468.9(8) | 16.9(3) |
| C2  | 3566.9(13) | 809.9(9)   | 5230.4(9) | 19.3(3) |
| C3  | 4575.2(13) | 927.2(9)   | 5510.9(9) | 19.9(3) |
| C4  | 4716.1(13) | 1482.5(9)  | 6017.3(8) | 17.5(3) |
| C5  | 3841.7(12) | 1908.6(9)  | 6227.2(8) | 14.6(3) |
| C6  | 175.0(14)  | 3991.9(10) | 6583.9(9) | 22.7(3) |
| C7  | -81.2(14)  | 4715.9(10) | 6817.1(9) | 24.3(4) |
| C8  | 679.8(15)  | 5122.3(10) | 7187.9(9) | 24.5(4) |
| C9  | 1671.8(15) | 4797.0(9)  | 7304.2(9) | 21.9(3) |
| C10 | 1865.5(13) | 4061.1(9)  | 7058.7(8) | 17.8(3) |
| C11 | 3909.3(12) | 2528.9(9)  | 6773.4(8) | 16.3(3) |
| C12 | 2909.9(13) | 3648.7(9)  | 7183.6(8) | 17.7(3) |
| C13 | 3426.7(13) | 3552.9(9)  | 5945.9(8) | 17.0(3) |
| C14 | 4339.5(13) | 4115.1(9)  | 6002.1(8) | 16.2(3) |
| C15 | 5405.4(13) | 3888.3(9)  | 5944.6(8) | 18.3(3) |
| C16 | 6218.6(13) | 4426.2(9)  | 5959.5(8) | 17.8(3) |
| C17 | 5992.7(12) | 5203.6(9)  | 6013.5(8) | 15.5(3) |
| C18 | 4931.5(13) | 5430.0(9)  | 6089.0(9) | 21.4(3) |
| C19 | 4120.1(13) | 4889.5(10) | 6088.2(9) | 21.9(4) |
| C20 | 6907.0(13) | 5761.6(9)  | 5985.4(8) | 16.4(3) |
| C21 | 7445.3(14) | 7100.6(9)  | 5881.2(9) | 22.5(3) |

**Table S3 Anisotropic Displacement Parameters ( $\text{\AA}^2 \times 10^3$ ) for ONW144s<sub>2</sub>. The Anisotropic displacement factor exponent takes the form:  $-2\pi^2[\mathbf{h}^2\mathbf{a}^{*2}\mathbf{U}_{11}+2\mathbf{h}\mathbf{k}\mathbf{a}^*\mathbf{b}^*\mathbf{U}_{12}+\dots]$ .**

| Atom | $\mathbf{U}_{11}$ | $\mathbf{U}_{22}$ | $\mathbf{U}_{33}$ | $\mathbf{U}_{23}$ | $\mathbf{U}_{13}$ | $\mathbf{U}_{12}$ |
|------|-------------------|-------------------|-------------------|-------------------|-------------------|-------------------|
| Zn1  | 11.65(9)          | 14.90(9)          | 16.06(10)         | 0.47(7)           | 0.43(6)           | -0.78(7)          |
| Cl1  | 25.4(2)           | 23.93(19)         | 17.71(19)         | 3.45(14)          | 4.31(16)          | -1.89(16)         |
| Cl2  | 14.18(17)         | 20.83(18)         | 18.78(18)         | 2.30(14)          | -2.08(14)         | -0.70(14)         |
| O1   | 12.6(6)           | 22.9(6)           | 33.9(7)           | -0.6(5)           | 0.6(5)            | 1.2(5)            |
| N1   | 12.8(6)           | 15.5(6)           | 16.3(6)           | 0.5(5)            | 0.0(5)            | -0.1(5)           |
| N2   | 17.0(7)           | 17.8(6)           | 21.4(7)           | 1.4(5)            | 1.3(5)            | 1.2(5)            |
| N3   | 15.1(6)           | 15.0(6)           | 14.3(6)           | 0.1(5)            | -1.1(5)           | 0.1(5)            |
| N4   | 10.6(7)           | 18.7(7)           | 28.2(8)           | 4.8(6)            | -1.1(6)           | -0.7(5)           |
| C1   | 14.9(8)           | 17.4(7)           | 18.5(8)           | 0.8(6)            | -1.2(6)           | -1.5(6)           |
| C2   | 20.6(8)           | 17.6(7)           | 19.6(8)           | -1.3(6)           | 0.0(6)            | 1.3(6)            |
| C3   | 17.6(8)           | 19.6(8)           | 22.6(8)           | 1.8(6)            | 2.1(6)            | 6.0(6)            |
| C4   | 13.3(7)           | 19.8(8)           | 19.5(8)           | 3.4(6)            | -0.4(6)           | 0.9(6)            |
| C5   | 13.4(7)           | 14.7(7)           | 15.6(7)           | 2.8(5)            | 0.2(6)            | -1.4(6)           |
| C6   | 17.1(8)           | 22.7(8)           | 28.2(9)           | 3.7(7)            | 2.1(7)            | 0.8(7)            |

|     |          |         |          |         |         |         |
|-----|----------|---------|----------|---------|---------|---------|
| C7  | 22.1(9)  | 24.0(8) | 26.8(9)  | 8.6(7)  | 7.0(7)  | 6.8(7)  |
| C8  | 34.1(10) | 18.5(8) | 21.1(8)  | 2.1(6)  | 6.6(7)  | 6.2(7)  |
| C9  | 30.6(9)  | 17.3(8) | 17.8(8)  | -0.8(6) | 0.8(7)  | 0.2(7)  |
| C10 | 20.0(8)  | 17.3(7) | 16.2(8)  | 1.4(6)  | 2.1(6)  | 0.3(6)  |
| C11 | 14.5(7)  | 18.2(7) | 16.3(7)  | 1.1(6)  | -2.4(6) | 0.9(6)  |
| C12 | 19.4(8)  | 17.6(7) | 16.1(7)  | -1.7(6) | -2.1(6) | -0.5(6) |
| C13 | 17.0(8)  | 17.5(7) | 16.6(7)  | 2.6(6)  | -2.3(6) | -2.9(6) |
| C14 | 16.0(8)  | 17.3(7) | 15.5(7)  | 2.6(6)  | -0.9(6) | -2.0(6) |
| C15 | 19.6(8)  | 15.4(7) | 19.9(8)  | -2.6(6) | 4.2(6)  | 1.8(6)  |
| C16 | 14.4(7)  | 20.6(8) | 18.4(8)  | -1.2(6) | 3.5(6)  | 2.8(6)  |
| C17 | 14.9(7)  | 16.9(7) | 14.6(7)  | 1.7(6)  | 0.5(6)  | -0.4(6) |
| C18 | 16.5(8)  | 14.5(7) | 33.3(10) | 4.4(6)  | 3.5(7)  | 1.8(6)  |
| C19 | 11.3(7)  | 19.4(8) | 35.1(10) | 7.1(7)  | 1.3(7)  | 2.3(6)  |
| C20 | 14.9(7)  | 20.0(8) | 14.4(7)  | -0.4(6) | 1.1(6)  | 0.5(6)  |
| C21 | 16.9(8)  | 20.2(8) | 30.5(9)  | 4.6(7)  | -2.3(7) | -4.6(7) |

**Table S4 Bond Lengths for ONW144s\_.**

| Atom | Atom | Length/Å   | Atom | Atom | Length/Å |
|------|------|------------|------|------|----------|
| Zn1  | Cl1  | 2.2614(4)  | C3   | C4   | 1.388(2) |
| Zn1  | Cl2  | 2.2817(4)  | C4   | C5   | 1.386(2) |
| Zn1  | N1   | 2.1697(13) | C5   | C11  | 1.514(2) |
| Zn1  | N2   | 2.1741(14) | C6   | C7   | 1.382(2) |
| Zn1  | N3   | 2.2005(13) | C7   | C8   | 1.388(3) |
| O1   | C20  | 1.240(2)   | C8   | C9   | 1.386(3) |
| N1   | C1   | 1.341(2)   | C9   | C10  | 1.393(2) |
| N1   | C5   | 1.349(2)   | C10  | C12  | 1.514(2) |
| N2   | C6   | 1.347(2)   | C13  | C14  | 1.513(2) |
| N2   | C10  | 1.342(2)   | C14  | C15  | 1.398(2) |
| N3   | C11  | 1.475(2)   | C14  | C19  | 1.393(2) |
| N3   | C12  | 1.473(2)   | C15  | C16  | 1.388(2) |
| N3   | C13  | 1.499(2)   | C16  | C17  | 1.394(2) |
| N4   | C20  | 1.339(2)   | C17  | C18  | 1.395(2) |
| N4   | C21  | 1.450(2)   | C17  | C20  | 1.507(2) |
| C1   | C2   | 1.387(2)   | C18  | C19  | 1.389(2) |
| C2   | C3   | 1.390(2)   |      |      |          |

**Table S5 Bond Angles for ONW144s\_.**

| Atom | Atom | Atom | Angle/°     | Atom | Atom | Atom | Angle/°    |
|------|------|------|-------------|------|------|------|------------|
| Cl1  | Zn1  | Cl2  | 117.906(17) | N1   | C5   | C4   | 122.11(14) |
| N1   | Zn1  | Cl1  | 98.38(4)    | N1   | C5   | C11  | 114.92(13) |
| N1   | Zn1  | Cl2  | 97.03(4)    | C4   | C5   | C11  | 122.97(14) |



|     |     |     |            |     |     |     |            |
|-----|-----|-----|------------|-----|-----|-----|------------|
| N1  | Zn1 | N2  | 148.09(5)  | N2  | C6  | C7  | 122.77(17) |
| N1  | Zn1 | N3  | 75.06(5)   | C6  | C7  | C8  | 118.52(17) |
| N2  | Zn1 | C11 | 102.30(4)  | C9  | C8  | C7  | 119.29(16) |
| N2  | Zn1 | C12 | 94.46(4)   | C8  | C9  | C10 | 118.78(16) |
| N2  | Zn1 | N3  | 75.81(5)   | N2  | C10 | C9  | 122.14(16) |
| N3  | Zn1 | C11 | 106.94(4)  | N2  | C10 | C12 | 115.33(14) |
| N3  | Zn1 | C12 | 135.15(4)  | C9  | C10 | C12 | 122.52(15) |
| C1  | N1  | Zn1 | 126.83(11) | N3  | C11 | C5  | 108.49(12) |
| C1  | N1  | C5  | 118.65(13) | N3  | C12 | C10 | 109.61(13) |
| C5  | N1  | Zn1 | 114.50(10) | N3  | C13 | C14 | 116.39(13) |
| C6  | N2  | Zn1 | 126.88(12) | C15 | C14 | C13 | 122.16(14) |
| C10 | N2  | Zn1 | 114.64(11) | C19 | C14 | C13 | 119.48(15) |
| C10 | N2  | C6  | 118.48(15) | C19 | C14 | C15 | 118.32(15) |
| C11 | N3  | Zn1 | 104.96(9)  | C16 | C15 | C14 | 120.50(15) |
| C11 | N3  | C13 | 112.50(12) | C15 | C16 | C17 | 120.98(15) |
| C12 | N3  | Zn1 | 105.59(9)  | C16 | C17 | C18 | 118.60(15) |
| C12 | N3  | C11 | 112.88(12) | C16 | C17 | C20 | 118.41(14) |
| C12 | N3  | C13 | 112.73(12) | C18 | C17 | C20 | 122.99(14) |
| C13 | N3  | Zn1 | 107.46(9)  | C19 | C18 | C17 | 120.28(15) |
| C20 | N4  | C21 | 122.66(14) | C18 | C19 | C14 | 121.23(15) |
| N1  | C1  | C2  | 122.79(15) | O1  | C20 | N4  | 122.31(15) |
| C1  | C2  | C3  | 118.21(15) | O1  | C20 | C17 | 121.13(14) |
| C4  | C3  | C2  | 119.49(15) | N4  | C20 | C17 | 116.56(14) |
| C5  | C4  | C3  | 118.76(15) |     |     |     |            |

**Table S6 Hydrogen Bonds for ONW144s<sub>-</sub>.**

| D  | H  | A                | d(D-H)/Å  | d(H-A)/Å  | d(D-A)/Å   | D-H-A/° |
|----|----|------------------|-----------|-----------|------------|---------|
| N4 | H4 | Cl2 <sup>1</sup> | 0.776(15) | 2.520(16) | 3.2464(15) | 156(2)  |
| C7 | H7 | O1 <sup>2</sup>  | 0.95      | 2.47      | 3.354(2)   | 155.6   |

<sup>1</sup>1/2-X,1/2+Y,+Z; <sup>2</sup>-1+X,+Y,+Z

**Table S7 Torsion Angles for ONW144s<sub>-</sub>.**

| A   | B  | C   | D   | Angle/°    | A   | B   | C   | D   | Angle/°    |
|-----|----|-----|-----|------------|-----|-----|-----|-----|------------|
| Zn1 | N1 | C1  | C2  | 178.45(12) | C8  | C9  | C10 | N2  | 0.9(2)     |
| Zn1 | N1 | C5  | C4  | 178.56(12) | C8  | C9  | C10 | C12 | 177.73(15) |
| Zn1 | N1 | C5  | C11 | -1.42(16)  | C9  | C10 | C12 | N3  | 148.85(15) |
| Zn1 | N2 | C6  | C7  | 178.41(12) | C10 | N2  | C6  | C7  | -1.2(2)    |
| Zn1 | N2 | C10 | C9  | 179.19(12) | C11 | N3  | C12 | C10 | 160.31(13) |

|                |            |                 |            |
|----------------|------------|-----------------|------------|
| Zn1 N2 C10 C12 | -0.45(17)  | C11 N3 C13 C14  | -74.67(17) |
| Zn1 N3 C11 C5  | 49.12(13)  | C12 N3 C11 C5   | 163.62(13) |
| Zn1 N3 C12 C10 | -46.19(13) | C12 N3 C13 C14  | 54.36(18)  |
| Zn1 N3 C13 C14 | 170.29(11) | C13 N3 C11 C5   | -67.42(16) |
| N1 C1 C2 C3    | -0.1(2)    | C13 N3 C12 C10  | 70.85(16)  |
| N1 C5 C11 N3   | -33.07(18) | C13 C14 C15 C16 | 176.32(15) |
| N2 C6 C7 C8    | 0.5(3)     | C13 C14 C19 C18 | 175.05(16) |
| N2 C10 C12 N3  | 32.42(19)  | C14 C15 C16 C17 | -1.7(2)    |
| N3 C13 C14 C15 | 84.25(19)  | C15 C14 C19 C18 | 2.6(3)     |
| N3 C13 C14 C19 | -98.18(18) | C15 C16 C17 C18 | 3.3(2)     |
| C1 N1 C5 C4    | -0.1(2)    | C15 C16 C17 C20 | 176.53(14) |
| C1 N1 C5 C11   | 179.96(13) | C16 C17 C18 C19 | -2.0(2)    |
| C1 C2 C3 C4    | 0.2(2)     | C16 C17 C20 O1  | -9.7(2)    |
| C2 C3 C4 C5    | -0.3(2)    | C16 C17 C20 N4  | 169.78(15) |
| C3 C4 C5 N1    | 0.2(2)     | C17 C18 C19 C14 | -1.0(3)    |
| C3 C4 C5 C11   | 179.80(14) | C18 C17 C20 O1  | 170.52(16) |
| C4 C5 C11 N3   | 146.95(15) | C18 C17 C20 N4  | -10.0(2)   |
| C5 N1 C1 C2    | 0.0(2)     | C19 C14 C15 C16 | -1.3(2)    |
| C6 N2 C10 C9   | 0.5(2)     | C20 C17 C18 C19 | 177.86(15) |
| C6 N2 C10 C12  | 179.20(14) | C21 N4 C20 O1   | 0.7(3)     |
| C6 C7 C8 C9    | 0.9(2)     | C21 N4 C20 C17  | 178.70(15) |
| C7 C8 C9 C10   | -1.6(2)    |                 |            |

**Table S8 Hydrogen Atom Coordinates ( $\text{\AA} \times 10^4$ ) and Isotropic Displacement Parameters ( $\text{\AA}^2 \times 10^3$ ) for ONW144s\_.**

| Atom | x        | y        | z        | U(eq) |
|------|----------|----------|----------|-------|
| H4   | 6059(13) | 6624(11) | 5885(11) | 23(5) |
| H1   | 2042     | 1182.59  | 5278.65  | 20    |
| H2   | 3451.83  | 431.73   | 4884.46  | 23    |
| H3   | 5163.51  | 629.74   | 5357.2   | 24    |
| H4A  | 5399.09  | 1568.74  | 6216.37  | 21    |
| H6   | -343.13  | 3714.66  | 6326.66  | 27    |
| H7   | -763.05  | 4930.53  | 6725.43  | 29    |
| H8   | 522.45   | 5618.18  | 7360.18  | 29    |
| H9   | 2209.91  | 5070.67  | 7546.81  | 26    |
| H11A | 3744.59  | 2314.08  | 7236.84  | 20    |
| H11B | 4639.47  | 2744.15  | 6786.09  | 20    |
| H12A | 3495     | 4024.94  | 7231.3   | 21    |
| H12B | 2866.11  | 3350.97  | 7619.91  | 21    |

|      |         |         |         |    |
|------|---------|---------|---------|----|
| H13A | 2788.33 | 3832.73 | 5781.64 | 20 |
| H13B | 3610.97 | 3171.69 | 5585.55 | 20 |
| H15  | 5574.33 | 3362.12 | 5895.06 | 22 |
| H16  | 6939.92 | 4262.13 | 5932.44 | 21 |
| H18  | 4763.28 | 5956.06 | 6141.19 | 26 |
| H19  | 3402.13 | 5050.89 | 6147.56 | 26 |
| H21A | 7957.46 | 6975.15 | 5513.83 | 34 |
| H21B | 7821.11 | 7145.09 | 6325.76 | 34 |
| H21C | 7095.01 | 7586.48 | 5772.17 | 34 |

#### Crystal structure determination of ONW144s\_

**Crystal Data** for  $C_{23}H_{25}Cl_2N_4OZn$  ( $M=482.69$  g/mol): orthorhombic, space group  $Pbca$  (no. 61),  $a = 12.5333(9)$  Å,  $b = 17.5056(12)$  Å,  $c = 19.2519(14)$  Å,  $V = 4223.9(5)$  Å<sup>3</sup>,  $Z = 8$ ,  $T = 100$  K,  $\mu(MoK\alpha) = 1.436$  mm<sup>-1</sup>,  $D_{calc} = 1.518$  g/cm<sup>3</sup>, 69597 reflections measured ( $4.232^\circ \leq 2\theta \leq 57.212^\circ$ ), 5392 unique ( $R_{int} = 0.0277$ ,  $R_{sigma} = 0.0160$ ) which were used in all calculations. The final  $R_1$  was 0.0271 ( $I > 2\sigma(I)$ ) and  $wR_2$  was 0.0690 (all data).

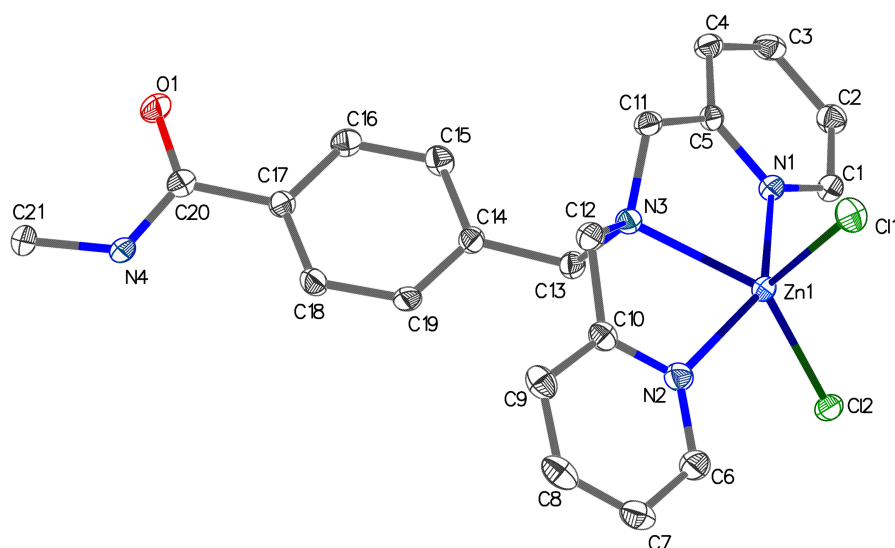

## ONW143s\_0m (13.Zn)

**Table S9 Crystal data and structure refinement for ONW143s\_0m.**

|                       |                          |
|-----------------------|--------------------------|
| Identification code   | ONW143s_0m               |
| Empirical formula     | $C_{23}H_{26}Cl_2N_4OZn$ |
| Formula weight        | 510.75                   |
| Temperature/K         | 100.0                    |
| Crystal system        | monoclinic               |
| Space group           | $P2_1/n$                 |
| $a/\text{\AA}$        | 11.531(5)                |
| $b/\text{\AA}$        | 9.136(4)                 |
| $c/\text{\AA}$        | 22.280(10)               |
| $\alpha/^\circ$       | 90                       |
| $\beta/^\circ$        | 93.892(10)               |
| $\gamma/^\circ$       | 90                       |
| Volume/Å <sup>3</sup> | 2341.6(18)               |

|                                                |                                                               |
|------------------------------------------------|---------------------------------------------------------------|
| Z                                              | 4                                                             |
| $\rho_{\text{calc}}/\text{g}/\text{cm}^3$      | 1.449                                                         |
| $\mu/\text{mm}^{-1}$                           | 1.300                                                         |
| F(000)                                         | 1056.0                                                        |
| Crystal size/ $\text{mm}^3$                    | $0.54 \times 0.23 \times 0.22$                                |
| Radiation                                      | MoK $\alpha$ ( $\lambda = 0.71073$ )                          |
| 2 $\Theta$ range for data collection/ $^\circ$ | 3.664 to 57.276                                               |
| Index ranges                                   | $-15 \leq h \leq 15, -12 \leq k \leq 10, -30 \leq l \leq 29$  |
| Reflections collected                          | 65388                                                         |
| Independent reflections                        | 5948 [ $R_{\text{int}} = 0.0300, R_{\text{sigma}} = 0.0174$ ] |
| Data/restraints/parameters                     | 5948/0/283                                                    |
| Goodness-of-fit on $F^2$                       | 1.045                                                         |
| Final R indexes [ $I \geq 2\sigma(I)$ ]        | $R_1 = 0.0244, wR_2 = 0.0593$                                 |
| Final R indexes [all data]                     | $R_1 = 0.0286, wR_2 = 0.0614$                                 |
| Largest diff. peak/hole / $e \text{ \AA}^{-3}$ | 0.39/-0.29                                                    |

**Table S10 Fractional Atomic Coordinates ( $\times 10^4$ ) and Equivalent Isotropic Displacement Parameters ( $\text{\AA}^2 \times 10^3$ ) for ONW143s\_0m.  $U_{\text{eq}}$  is defined as 1/3 of the trace of the orthogonalised  $U_{ij}$  tensor.**

| Atom | x          | y           | z         | U(eq)    |
|------|------------|-------------|-----------|----------|
| Zn1  | 2498.7(2)  | 8704.8(2)   | 5737.4(2) | 11.70(5) |
| Cl1  | 3079.2(3)  | 10537.2(4)  | 5123.9(2) | 17.92(7) |
| Cl2  | 884.7(3)   | 8109.4(4)   | 6199.7(2) | 18.93(7) |
| O1   | 7738.0(9)  | 1621.6(11)  | 7225.8(5) | 20.2(2)  |
| N1   | 3516.1(10) | 9573.5(12)  | 6554.1(5) | 14.1(2)  |
| N2   | 2051.5(10) | 7094.5(12)  | 4967.1(5) | 14.5(2)  |
| N3   | 3827.4(9)  | 7074.6(12)  | 5888.5(5) | 11.5(2)  |
| N4   | 7348.8(10) | 630.3(13)   | 6301.6(5) | 16.6(2)  |
| C1   | 3207.8(12) | 10570.9(15) | 6963.8(6) | 17.4(3)  |
| C2   | 3925.8(14) | 10863.9(17) | 7479.9(7) | 22.7(3)  |
| C3   | 4964.2(14) | 10108.4(17) | 7579.4(6) | 22.7(3)  |
| C4   | 5287.4(13) | 9085.3(16)  | 7155.2(6) | 18.4(3)  |
| C5   | 4546.6(12) | 8875.3(14)  | 6644.4(6) | 14.1(2)  |
| C6   | 2074.9(14) | 11370.9(17) | 6834.8(7) | 25.6(3)  |
| C7   | 1019.7(13) | 6885.3(16)  | 4654.4(6) | 18.5(3)  |
| C8   | 779.6(14)  | 5583.0(17)  | 4339.9(7) | 23.4(3)  |
| C9   | 1612.1(14) | 4487.1(17)  | 4344.3(7) | 25.2(3)  |

|     |            |            |           |         |
|-----|------------|------------|-----------|---------|
| C10 | 2685.5(13) | 4717.1(16) | 4657.9(7) | 20.5(3) |
| C11 | 2871.4(12) | 6039.9(14) | 4958.4(6) | 14.2(3) |
| C12 | 140.5(14)  | 8104.7(18) | 4653.3(8) | 28.2(3) |
| C13 | 4864.9(11) | 7904.0(14) | 6128.5(6) | 13.5(2) |
| C14 | 4019.0(12) | 6431.6(15) | 5291.2(6) | 14.4(3) |
| C15 | 3459.9(11) | 5924.5(14) | 6325.6(6) | 13.0(2) |
| C16 | 4367.3(11) | 4743.5(14) | 6452.4(6) | 12.7(2) |
| C17 | 5276.3(12) | 4953.1(14) | 6894.2(6) | 15.4(3) |
| C18 | 6172.9(12) | 3933.7(15) | 6972.0(6) | 15.6(3) |
| C19 | 6172.7(11) | 2672.7(14) | 6615.6(6) | 13.0(2) |
| C20 | 5245.9(11) | 2427.1(14) | 6189.7(6) | 13.0(2) |
| C21 | 4350.7(12) | 3452.7(14) | 6110.2(6) | 13.4(2) |
| C22 | 7155.0(12) | 1603.8(14) | 6740.3(6) | 14.0(2) |
| C23 | 8260.7(14) | -473.5(18) | 6384.1(7) | 24.4(3) |

**Table S11 Anisotropic Displacement Parameters ( $\text{\AA}^2 \times 10^3$ ) for ONW143s\_0m. The Anisotropic displacement factor exponent takes the form:  $-2\pi^2[\mathbf{h}^2\mathbf{a}^{*2}\mathbf{U}_{11}+2\mathbf{h}\mathbf{k}\mathbf{a}^*\mathbf{b}^*\mathbf{U}_{12}+\dots]$ .**

| Atom | $\mathbf{U}_{11}$ | $\mathbf{U}_{22}$ | $\mathbf{U}_{33}$ | $\mathbf{U}_{23}$ | $\mathbf{U}_{13}$ | $\mathbf{U}_{12}$ |
|------|-------------------|-------------------|-------------------|-------------------|-------------------|-------------------|
| Zn1  | 12.26(8)          | 11.73(8)          | 11.04(8)          | 0.28(5)           | 0.10(6)           | 2.84(5)           |
| Cl1  | 25.89(17)         | 14.67(15)         | 12.91(15)         | 0.85(11)          | -0.78(13)         | -3.19(12)         |
| Cl2  | 12.99(15)         | 23.14(17)         | 20.97(16)         | 3.78(13)          | 3.46(12)          | 3.35(12)          |
| O1   | 22.0(5)           | 20.0(5)           | 17.3(5)           | -1.8(4)           | -8.0(4)           | 6.7(4)            |
| N1   | 15.5(5)           | 15.3(5)           | 11.4(5)           | -0.9(4)           | 1.0(4)            | 0.2(4)            |
| N2   | 17.5(6)           | 13.3(5)           | 12.4(5)           | -0.1(4)           | -1.2(4)           | 1.5(4)            |
| N3   | 11.1(5)           | 12.8(5)           | 10.7(5)           | -0.6(4)           | 0.5(4)            | 0.8(4)            |
| N4   | 17.2(6)           | 19.7(6)           | 12.6(5)           | -0.3(4)           | -2.0(4)           | 7.7(5)            |
| C1   | 20.0(7)           | 18.1(6)           | 14.4(6)           | -3.0(5)           | 4.4(5)            | -1.0(5)           |
| C2   | 27.9(8)           | 25.4(7)           | 15.4(7)           | -7.2(6)           | 5.3(6)            | -6.0(6)           |
| C3   | 25.5(8)           | 29.6(8)           | 12.3(6)           | -1.7(6)           | -3.4(6)           | -8.5(6)           |
| C4   | 17.0(7)           | 21.2(7)           | 16.5(7)           | 2.8(5)            | -3.3(5)           | -3.9(5)           |
| C5   | 15.3(6)           | 14.0(6)           | 12.9(6)           | 1.6(5)            | 0.9(5)            | -1.7(5)           |
| C6   | 25.2(8)           | 25.6(8)           | 26.3(8)           | -9.5(6)           | 4.3(6)            | 5.8(6)            |
| C7   | 20.6(7)           | 19.8(7)           | 14.7(6)           | 0.3(5)            | -2.7(5)           | 1.9(5)            |
| C8   | 22.4(7)           | 26.4(8)           | 20.6(7)           | -5.5(6)           | -4.9(6)           | -2.4(6)           |
| C9   | 31.2(8)           | 20.5(7)           | 23.4(8)           | -10.4(6)          | 0.0(6)            | -3.0(6)           |
| C10  | 24.0(7)           | 17.6(7)           | 19.9(7)           | -5.4(5)           | 2.3(6)            | 3.1(5)            |
| C11  | 17.1(6)           | 15.1(6)           | 10.5(6)           | -0.5(5)           | 2.8(5)            | 1.5(5)            |
| C12  | 26.2(8)           | 28.2(8)           | 28.1(8)           | -4.3(7)           | -12.3(7)          | 10.8(6)           |
| C13  | 10.7(6)           | 15.1(6)           | 14.6(6)           | -0.4(5)           | 0.1(5)            | 0.8(5)            |
| C14  | 15.1(6)           | 16.3(6)           | 11.9(6)           | -2.0(5)           | 2.8(5)            | 3.0(5)            |
| C15  | 13.1(6)           | 12.7(6)           | 13.2(6)           | 1.3(5)            | 1.7(5)            | 1.8(5)            |
| C16  | 13.8(6)           | 12.1(6)           | 12.1(6)           | 1.8(5)            | 1.0(5)            | 1.5(5)            |
| C17  | 19.9(7)           | 12.3(6)           | 13.7(6)           | -1.8(5)           | -1.4(5)           | 2.4(5)            |

|     |         |         |         |         |         |         |
|-----|---------|---------|---------|---------|---------|---------|
| C18 | 17.7(7) | 15.1(6) | 13.1(6) | -0.6(5) | -4.7(5) | 1.8(5)  |
| C19 | 14.4(6) | 12.0(6) | 12.4(6) | 2.5(5)  | 0.5(5)  | 1.4(5)  |
| C20 | 16.0(6) | 10.3(6) | 12.6(6) | -0.4(4) | 0.0(5)  | 0.1(5)  |
| C21 | 13.5(6) | 13.1(6) | 13.2(6) | 0.7(5)  | -2.5(5) | -0.6(5) |
| C22 | 14.8(6) | 12.1(6) | 15.0(6) | 1.5(5)  | -0.2(5) | 1.7(5)  |
| C23 | 25.7(8) | 27.5(8) | 19.7(7) | -2.6(6) | -0.8(6) | 15.3(6) |

**Table S12 Bond Lengths for ONW143s\_0m.**

| Atom | Atom | Length/Å   | Atom | Atom | Length/Å   |
|------|------|------------|------|------|------------|
| Zn1  | Cl1  | 2.2898(7)  | C3   | C4   | 1.398(2)   |
| Zn1  | Cl2  | 2.2539(8)  | C4   | C5   | 1.389(2)   |
| Zn1  | N1   | 2.2421(13) | C5   | C13  | 1.5169(19) |
| Zn1  | N2   | 2.2925(13) | C7   | C8   | 1.399(2)   |
| Zn1  | N3   | 2.1468(13) | C7   | C12  | 1.506(2)   |
| O1   | C22  | 1.2344(17) | C8   | C9   | 1.387(2)   |
| N1   | C1   | 1.3544(18) | C9   | C10  | 1.395(2)   |
| N1   | C5   | 1.3516(18) | C10  | C11  | 1.391(2)   |
| N2   | C7   | 1.3509(19) | C11  | C14  | 1.515(2)   |
| N2   | C11  | 1.3509(17) | C15  | C16  | 1.5161(18) |
| N3   | C13  | 1.4847(17) | C16  | C17  | 1.4015(19) |
| N3   | C14  | 1.4849(17) | C16  | C21  | 1.4036(19) |
| N3   | C15  | 1.5126(17) | C17  | C18  | 1.3935(19) |
| N4   | C22  | 1.3513(18) | C18  | C19  | 1.3992(19) |
| N4   | C23  | 1.4594(18) | C19  | C20  | 1.3982(19) |
| C1   | C2   | 1.396(2)   | C19  | C22  | 1.5069(18) |
| C1   | C6   | 1.507(2)   | C20  | C21  | 1.3965(18) |
| C2   | C3   | 1.387(2)   |      |      |            |

**Table S13 Bond Angles for ONW143s\_0m.**

| Atom | Atom | Atom | Angle/°     | Atom | Atom | Atom | Angle/°    |
|------|------|------|-------------|------|------|------|------------|
| Cl1  | Zn1  | N2   | 94.72(4)    | N1   | C5   | C4   | 122.85(13) |
| Cl2  | Zn1  | Cl1  | 137.149(16) | N1   | C5   | C13  | 114.75(11) |
| Cl2  | Zn1  | N2   | 92.09(4)    | C4   | C5   | C13  | 122.32(13) |
| N1   | Zn1  | Cl1  | 93.88(4)    | N2   | C7   | C8   | 121.07(13) |
| N1   | Zn1  | Cl2  | 96.74(4)    | N2   | C7   | C12  | 117.73(13) |
| N1   | Zn1  | N2   | 155.98(4)   | C8   | C7   | C12  | 121.20(14) |
| N3   | Zn1  | Cl1  | 111.49(4)   | C9   | C8   | C7   | 119.81(14) |
| N3   | Zn1  | Cl2  | 111.32(4)   | C8   | C9   | C10  | 119.01(14) |
| N3   | Zn1  | N1   | 77.86(5)    | C11  | C10  | C9   | 118.31(14) |
| N3   | Zn1  | N2   | 78.12(5)    | N2   | C11  | C10  | 122.77(13) |
| C1   | N1   | Zn1  | 129.67(10)  | N2   | C11  | C14  | 114.42(12) |

|     |    |     |            |     |     |     |            |
|-----|----|-----|------------|-----|-----|-----|------------|
| C5  | N1 | Zn1 | 111.11(9)  | C10 | C11 | C14 | 122.80(12) |
| C5  | N1 | C1  | 119.04(12) | N3  | C13 | C5  | 109.94(11) |
| C7  | N2 | Zn1 | 128.49(9)  | N3  | C14 | C11 | 110.73(11) |
| C11 | N2 | Zn1 | 110.26(9)  | N3  | C15 | C16 | 113.23(11) |
| C11 | N2 | C7  | 118.98(12) | C17 | C16 | C15 | 120.49(12) |
| C13 | N3 | Zn1 | 104.56(8)  | C17 | C16 | C21 | 118.57(12) |
| C13 | N3 | C14 | 111.06(10) | C21 | C16 | C15 | 120.86(12) |
| C13 | N3 | C15 | 112.13(10) | C18 | C17 | C16 | 120.61(12) |
| C14 | N3 | Zn1 | 106.37(8)  | C17 | C18 | C19 | 120.54(12) |
| C14 | N3 | C15 | 111.56(10) | C18 | C19 | C22 | 117.24(12) |
| C15 | N3 | Zn1 | 110.78(8)  | C20 | C19 | C18 | 119.20(12) |
| C22 | N4 | C23 | 121.12(12) | C20 | C19 | C22 | 123.47(12) |
| N1  | C1 | C2  | 121.06(14) | C21 | C20 | C19 | 120.19(12) |
| N1  | C1 | C6  | 117.47(13) | C20 | C21 | C16 | 120.80(12) |
| C2  | C1 | C6  | 121.46(13) | O1  | C22 | N4  | 122.39(12) |
| C3  | C2 | C1  | 119.58(14) | O1  | C22 | C19 | 120.72(12) |
| C2  | C3 | C4  | 119.44(13) | N4  | C22 | C19 | 116.89(12) |
| C5  | C4 | C3  | 117.97(14) |     |     |     |            |

**Table S14 Hydrogen Bonds for ONW143s\_0m.**

| D   | H   | A                | d(D-H)/Å | d(H-A)/Å | d(D-A)/Å   | D-H-A/° |
|-----|-----|------------------|----------|----------|------------|---------|
| N4  | H4  | Cl1 <sup>1</sup> | 0.88     | 2.65     | 3.3550(18) | 137.5   |
| C17 | H17 | O1 <sup>2</sup>  | 0.95     | 2.71     | 3.2865(19) | 120.0   |
| C18 | H18 | O1 <sup>2</sup>  | 0.95     | 2.61     | 3.2399(19) | 124.3   |

<sup>1</sup>1-X,1-Y,1-Z; <sup>2</sup>3/2-X,1/2+Y,3/2-Z

**Table S15 Torsion Angles for ONW143s\_0m.**

| A   | B  | C   | D   | Angle/°    | A   | B   | C   | D   | Angle/°     |
|-----|----|-----|-----|------------|-----|-----|-----|-----|-------------|
| Zn1 | N1 | C1  | C2  | 173.42(10) | C8  | C9  | C10 | C11 | 0.5(2)      |
| Zn1 | N1 | C1  | C6  | -7.79(19)  | C9  | C10 | C11 | N2  | 1.2(2)      |
| Zn1 | N1 | C5  | C4  | 172.57(11) | C9  | C10 | C11 | C14 | -177.41(13) |
| Zn1 | N1 | C5  | C13 | 10.63(13)  | C10 | C11 | C14 | N3  | -134.99(13) |
| Zn1 | N2 | C7  | C8  | 159.12(11) | C11 | N2  | C7  | C8  | 2.0(2)      |
| Zn1 | N2 | C7  | C12 | 21.22(19)  | C11 | N2  | C7  | C12 | -177.69(13) |
| Zn1 | N2 | C11 | C10 | 161.91(11) | C12 | C7  | C8  | C9  | 179.29(15)  |
| Zn1 | N2 | C11 | C14 | -19.41(13) | C13 | N3  | C14 | C11 | -160.99(11) |
| Zn1 | N3 | C13 | C5  | 50.43(11)  | C13 | N3  | C15 | C16 | -63.38(14)  |
| Zn1 | N3 | C14 | C11 | -47.78(12) | C14 | N3  | C13 | C5  | 164.78(10)  |

|                |            |                 |            |
|----------------|------------|-----------------|------------|
| Zn1 N3 C15 C16 | -179.78(8) | C14 N3 C15 C16  | 61.92(14)  |
| N1 C1 C2 C3    | -0.9(2)    | C15 N3 C13 C5   | -69.65(13) |
| N1 C5 C13 N3   | -42.01(15) | C15 N3 C14 C11  | 73.12(13)  |
| N2 C7 C8 C9    | -0.4(2)    | C15 C16 C17 C18 | 173.75(12) |
| N2 C11 C14 N3  | 46.32(15)  | C15 C16 C21 C20 | 174.04(12) |
| N3 C15 C16 C17 | 84.81(15)  | C16 C17 C18 C19 | -0.9(2)    |
| N3 C15 C16 C21 | -91.86(15) | C17 C16 C21 C20 | -2.69(19)  |
| C1 N1 C5 C4    | 3.0(2)     | C17 C18 C19 C20 | -1.6(2)    |
| C1 N1 C5 C13   | 173.79(12) | C17 C18 C19 C22 | 178.25(12) |
| C1 C2 C3 C4    | 1.3(2)     | C18 C19 C20 C21 | 1.92(19)   |
| C2 C3 C4 C5    | 0.4(2)     | C18 C19 C22 O1  | 19.34(19)  |
| C3 C4 C5 N1    | -2.6(2)    | C18 C19 C22 N4  | 161.45(12) |
| C3 C4 C5 C13   | 173.98(13) | C19 C20 C21 C16 | 0.3(2)     |
| C4 C5 C13 N3   | 141.17(13) | C20 C19 C22 O1  | 157.13(13) |
| C5 N1 C1 C2    | -1.2(2)    | C20 C19 C22 N4  | 22.08(19)  |
| C5 N1 C1 C6    | 177.57(13) | C21 C16 C17 C18 | 3.0(2)     |
| C6 C1 C2 C3    | 179.63(14) | C22 C19 C20 C21 | 178.33(12) |
| C7 N2 C11 C10  | -2.4(2)    | C23 N4 C22 O1   | 0.7(2)     |
| C7 N2 C11 C14  | 176.28(12) | C23 N4 C22 C19  | 178.48(13) |
| C7 C8 C9 C10   | -0.9(2)    |                 |            |

**Table S16 Hydrogen Atom Coordinates ( $\text{\AA} \times 10^4$ ) and Isotropic Displacement Parameters ( $\text{\AA}^2 \times 10^3$ ) for ONW143s\_0m.**

| Atom | x       | y        | z       | U(eq) |
|------|---------|----------|---------|-------|
| H4   | 6917.93 | 662.4    | 5960.4  | 20    |
| H2   | 3704.38 | 11576.15 | 7760.93 | 27    |
| H3   | 5451.85 | 10284.85 | 7933    | 27    |
| H4A  | 5992.1  | 8549.83  | 7214.44 | 22    |
| H6A  | 2014.23 | 11694.61 | 6414.45 | 38    |
| H6B  | 2047.71 | 12224.03 | 7100.09 | 38    |
| H6C  | 1426.33 | 10714.24 | 6905.83 | 38    |
| H8   | 48.22   | 5449.81  | 4123.88 | 28    |
| H9   | 1454    | 3593.01  | 4136.94 | 30    |
| H10  | 3274.41 | 3988.78  | 4666.04 | 25    |
| H12A | -405.75 | 7915.9   | 4962.6  | 42    |
| H12B | -285.6  | 8156.15  | 4258.05 | 42    |
| H12C | 540.93  | 9035.51  | 4738.5  | 42    |
| H13A | 5164.05 | 8512.65  | 5805.39 | 16    |
| H13B | 5485    | 7212.74  | 6271.06 | 16    |



|      |         |          |         |    |
|------|---------|----------|---------|----|
| H14A | 4505.13 | 5541.88  | 5344.97 | 17 |
| H14B | 4439.72 | 7142.84  | 5050.62 | 17 |
| H15A | 2730.12 | 5462.58  | 6160.13 | 16 |
| H15B | 3297.27 | 6406.24  | 6708.98 | 16 |
| H17  | 5281.32 | 5797.94  | 7142.9  | 18 |
| H18  | 6789.27 | 4096.22  | 7269.42 | 19 |
| H20  | 5225.06 | 1559.98  | 5953.89 | 16 |
| H21  | 3722.85 | 3274.77  | 5820.91 | 16 |
| H23A | 8445.03 | -858.17  | 5991.2  | 37 |
| H23B | 7991.48 | -1273.55 | 6632.58 | 37 |
| H23C | 8957.97 | -29.81   | 6584.02 | 37 |

#### Crystal structure determination of ONW143s\_0m

**Crystal Data** for  $C_{23}H_{26}Cl_2N_4OZn$  ( $M=510.75$  g/mol): monoclinic, space group  $P2_1/n$  (no. 14),  $a = 11.531(5)$  Å,  $b = 9.136(4)$  Å,  $c = 22.280(10)$  Å,  $\beta = 93.892(10)^\circ$ ,  $V = 2341.6(18)$  Å<sup>3</sup>,  $Z = 4$ ,  $T = 100.0$  K,  $\mu(\text{MoK}\alpha) = 1.300$  mm<sup>-1</sup>,  $D_{\text{calc}} = 1.449$  g/cm<sup>3</sup>, 65388 reflections measured ( $3.664^\circ \leq 2\theta \leq 57.276^\circ$ ), 5948 unique ( $R_{\text{int}} = 0.0300$ ,  $R_{\text{sigma}} = 0.0174$ ) which were used in all calculations. The final  $R_1$  was 0.0244 ( $I > 2\sigma(I)$ ) and  $wR_2$  was 0.0614 (all data).

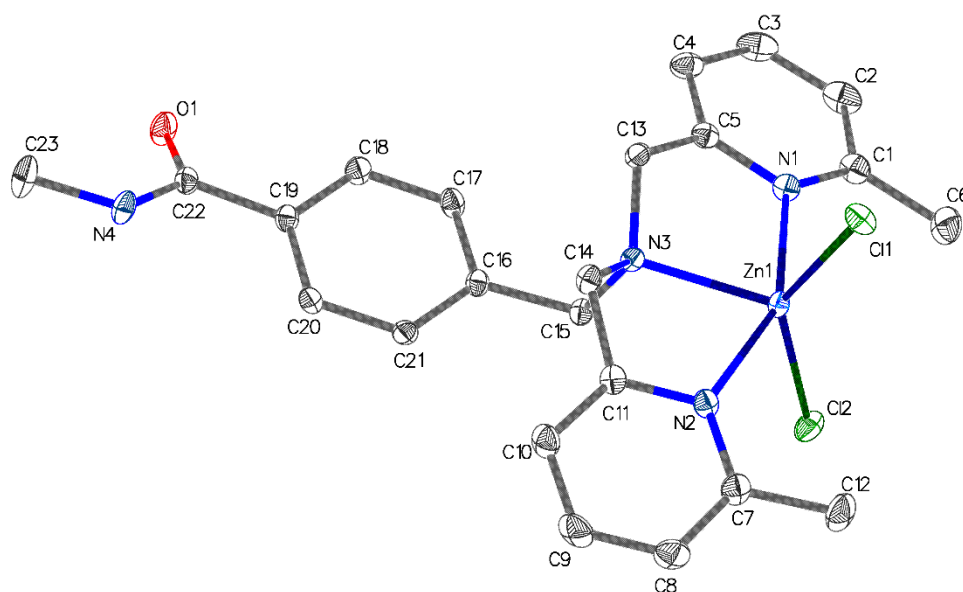

# ONW146v\_0m (14.Zn)

**Table S17 Crystal data and structure refinement for ONW146v\_0m.**

|                                                |                                                                                  |
|------------------------------------------------|----------------------------------------------------------------------------------|
| Identification code                            | ONW146v_0m                                                                       |
| Empirical formula                              | C <sub>22</sub> H <sub>28</sub> Cl <sub>2</sub> N <sub>6</sub> O <sub>2</sub> Zn |
| Formula weight                                 | 544.77                                                                           |
| Temperature/K                                  | 100.0                                                                            |
| Crystal system                                 | triclinic                                                                        |
| Space group                                    | P-1                                                                              |
| a/Å                                            | 10.4293(5)                                                                       |
| b/Å                                            | 15.2887(7)                                                                       |
| c/Å                                            | 16.4734(8)                                                                       |
| $\alpha/^\circ$                                | 101.862(2)                                                                       |
| $\beta/^\circ$                                 | 90.335(2)                                                                        |
| $\gamma/^\circ$                                | 92.981(2)                                                                        |
| Volume/Å <sup>3</sup>                          | 2566.8(2)                                                                        |
| Z                                              | 4                                                                                |
| $\rho_{\text{calc}}/\text{g/cm}^3$             | 1.410                                                                            |
| $\mu/\text{mm}^{-1}$                           | 3.493                                                                            |
| F(000)                                         | 1128.0                                                                           |
| Crystal size/mm <sup>3</sup>                   | 0.35 × 0.28 × 0.068                                                              |
| Radiation                                      | CuK $\alpha$ ( $\lambda$ = 1.54178)                                              |
| 2 $\Theta$ range for data collection/ $^\circ$ | 5.482 to 133.57                                                                  |
| Index ranges                                   | -12 ≤ h ≤ 12, -17 ≤ k ≤ 18, -19 ≤ l ≤ 19                                         |
| Reflections collected                          | 101989                                                                           |
| Independent reflections                        | 9030 [ $R_{\text{int}}$ = 0.0585, $R_{\text{sigma}}$ = 0.0240]                   |
| Data/restraints/parameters                     | 9030/0/601                                                                       |
| Goodness-of-fit on F <sup>2</sup>              | 1.040                                                                            |
| Final R indexes [ $I \geq 2\sigma(I)$ ]        | $R_1$ = 0.0589, $wR_2$ = 0.1595                                                  |
| Final R indexes [all data]                     | $R_1$ = 0.0625, $wR_2$ = 0.1642                                                  |
| Largest diff. peak/hole / e Å <sup>-3</sup>    | 3.00/-0.75                                                                       |

**Table S18 Fractional Atomic Coordinates ( $\times 10^4$ ) and Equivalent Isotropic Displacement Parameters ( $\text{\AA}^2 \times 10^3$ ) for ONW146v\_0m.  $U_{\text{eq}}$  is defined as 1/3 of the trace of the orthogonalised  $U_{ij}$  tensor.**

| Atom | x           | y          | z          | U(eq)     |
|------|-------------|------------|------------|-----------|
| Zn1  | -904.4(4)   | 8219.1(3)  | 3707.5(2)  | 17.86(14) |
| Cl1  | -1691.7(13) | 9570.0(6)  | 4283.7(7)  | 57.6(4)   |
| Cl2  | -2221.1(7)  | 7231.9(6)  | 2805.3(5)  | 27.6(2)   |
| O1   | 5569(2)     | 4345.1(15) | 4001.0(14) | 26.3(5)   |

|     |             |            |            |           |
|-----|-------------|------------|------------|-----------|
| N1  | -1304(2)    | 7586.2(16) | 4765.9(15) | 18.7(5)   |
| N2  | 321(3)      | 8665.1(16) | 2772.2(16) | 21.1(5)   |
| N3  | 930(2)      | 7762.6(16) | 3963.6(15) | 17.5(5)   |
| N4  | 6789(3)     | 5442.0(18) | 3607.7(17) | 24.4(6)   |
| N5  | -3521(3)    | 7611.8(19) | 4696.4(17) | 25.3(6)   |
| N6  | -1302(3)    | 8977.8(19) | 1931.3(18) | 30.5(7)   |
| C1  | -2466(3)    | 7348(2)    | 5032.6(19) | 20.1(6)   |
| C2  | -2584(3)    | 6842(2)    | 5657.6(19) | 22.4(6)   |
| C3  | -1488(3)    | 6598(2)    | 5999.8(19) | 24.0(7)   |
| C4  | -276(3)     | 6866(2)    | 5743.8(19) | 23.7(7)   |
| C5  | -245(3)     | 7354.0(19) | 5133.0(18) | 19.0(6)   |
| C6  | -26(4)      | 8927(2)    | 2078.9(19) | 25.9(7)   |
| C7  | 884(4)      | 9127(2)    | 1505(2)    | 32.2(8)   |
| C8  | 2154(4)     | 9040(2)    | 1655(2)    | 33.8(9)   |
| C9  | 2527(4)     | 8769(2)    | 2379(2)    | 29.7(8)   |
| C10 | 1597(3)     | 8612(2)    | 2918(2)    | 22.6(7)   |
| C11 | 1009(3)     | 7734(2)    | 4851.0(18) | 18.8(6)   |
| C12 | 1921(3)     | 8398(2)    | 3748.8(19) | 19.3(6)   |
| C13 | 978(3)      | 6851.6(19) | 3409.2(18) | 17.7(6)   |
| C14 | 2202(3)     | 6384(2)    | 3468.0(18) | 19.6(6)   |
| C15 | 2276(3)     | 5790(2)    | 4004.4(19) | 20.2(6)   |
| C16 | 3403(3)     | 5366(2)    | 4083.4(19) | 21.5(6)   |
| C17 | 4480(3)     | 5540(2)    | 3636.1(19) | 19.6(6)   |
| C18 | 4408(3)     | 6119(2)    | 3086.5(19) | 20.7(6)   |
| C19 | 3273(3)     | 6527(2)    | 2999.5(18) | 20.3(6)   |
| C20 | 5663(3)     | 5059(2)    | 3763.3(18) | 20.2(6)   |
| C21 | 7988(3)     | 5042(2)    | 3722(2)    | 28.9(7)   |
| Zn2 | -627.2(4)   | 1812.9(3)  | 1282.6(2)  | 17.56(14) |
| Cl3 | -1628.3(12) | 467.8(6)   | 689.5(6)   | 52.4(3)   |
| Cl4 | -1786.9(7)  | 2755.4(5)  | 2229.1(5)  | 26.22(19) |
| O2  | 6617(2)     | 5598.7(15) | 1002.6(14) | 24.9(5)   |
| N7  | -980(2)     | 2484.9(16) | 254.2(15)  | 17.5(5)   |
| N8  | 559(3)      | 1348.6(16) | 2191.8(16) | 20.6(5)   |
| N9  | 1273(2)     | 2275.4(16) | 1017.1(15) | 16.6(5)   |
| N10 | 7537(2)     | 4553.0(17) | 1552.6(16) | 21.8(5)   |
| N11 | -3202(3)    | 2480.5(18) | 338.4(17)  | 23.7(6)   |
| N12 | -1080(3)    | 1025.0(18) | 3046.3(17) | 27.4(6)   |
| C22 | -2107(3)    | 2742(2)    | 1.4(18)    | 19.5(6)   |
| C23 | -2159(3)    | 3270(2)    | -604.9(19) | 22.1(6)   |
| C24 | -1040(3)    | 3504(2)    | -957(2)    | 24.5(7)   |
| C25 | 132(3)      | 3223(2)    | -713.9(19) | 22.9(6)   |
| C26 | 101(3)      | 2715(2)    | -115.5(18) | 18.7(6)   |
| C27 | 185(3)      | 1077(2)    | 2890.2(19) | 24.3(7)   |
| C28 | 1092(4)     | 858(2)     | 3445(2)    | 30.3(8)   |
| C29 | 2367(4)     | 933(2)     | 3285(2)    | 31.2(8)   |

|     |         |            |            |         |
|-----|---------|------------|------------|---------|
| C30 | 2763(3) | 1212(2)    | 2563(2)    | 27.4(7) |
| C31 | 1830(3) | 1398.8(19) | 2042.3(19) | 20.4(6) |
| C32 | 1308(3) | 2320(2)    | 131.5(18)  | 20.9(6) |
| C33 | 2156(3) | 1622(2)    | 1211.1(19) | 19.8(6) |
| C34 | 1487(3) | 3177.6(19) | 1573.6(18) | 18.3(6) |
| C35 | 2788(3) | 3643.6(19) | 1521.9(18) | 18.0(6) |
| C36 | 2977(3) | 4262(2)    | 1013.9(19) | 20.3(6) |
| C37 | 4178(3) | 4680(2)    | 960.1(19)  | 20.9(6) |
| C38 | 5229(3) | 4464.9(19) | 1399.1(18) | 18.2(6) |
| C39 | 5043(3) | 3859(2)    | 1916.2(18) | 19.7(6) |
| C40 | 3835(3) | 3463(2)    | 1984.5(18) | 19.6(6) |
| C41 | 6516(3) | 4920(2)    | 1301.7(18) | 19.5(6) |
| C42 | 8819(3) | 4947(2)    | 1505(2)    | 26.2(7) |
| O3  | 4050(2) | 7208.2(16) | 5441.9(16) | 30.2(5) |
| C43 | 4073(4) | 7849(3)    | 6187(3)    | 39.5(9) |
| O4  | 5415(2) | 7007.5(18) | 532.5(16)  | 35.5(6) |
| C44 | 5551(4) | 7702(3)    | 1228(2)    | 39.1(9) |

**Table S19 Anisotropic Displacement Parameters ( $\text{\AA}^2 \times 10^3$ ) for ONW146v\_0m. The Anisotropic displacement factor exponent takes the form:  $-2\pi^2[h^2a^{*2}U_{11}+2hka^*b^*U_{12}+...]$ .**

| Atom | $U_{11}$  | $U_{22}$ | $U_{33}$ | $U_{23}$ | $U_{13}$ | $U_{12}$ |
|------|-----------|----------|----------|----------|----------|----------|
| Zn1  | 23.9(2)   | 14.8(2)  | 15.7(2)  | 4.13(16) | 2.81(16) | 4.29(16) |
| Cl1  | 108.5(10) | 23.0(5)  | 49.2(6)  | 18.2(4)  | 51.6(6)  | 28.8(5)  |
| Cl2  | 27.3(4)   | 36.0(5)  | 19.7(4)  | 7.9(3)   | -4.3(3)  | -5.7(3)  |
| O1   | 31.2(12)  | 21.3(12) | 29.2(12) | 10.2(9)  | 1.9(10)  | 5.6(9)   |
| N1   | 26.6(13)  | 14.8(12) | 13.5(12) | 0.7(9)   | 2.2(10)  | 0.3(10)  |
| N2   | 32.8(14)  | 11.6(12) | 18.0(13) | 1.5(10)  | 1.9(11)  | -0.2(10) |
| N3   | 20.5(12)  | 13.3(12) | 17.9(12) | 1.7(10)  | 3.3(10)  | -0.4(9)  |
| N4   | 26.9(14)  | 16.1(13) | 29.4(15) | 2.4(11)  | -0.8(11) | 1.4(10)  |
| N5   | 23.6(13)  | 27.7(15) | 27.6(14) | 12.3(11) | 4.7(11)  | 3.2(11)  |
| N6   | 48.1(18)  | 24.4(15) | 21.3(14) | 10.4(11) | -3.9(13) | 0.8(13)  |
| C1   | 25.9(15)  | 14.3(15) | 18.1(15) | -1.2(11) | 3.1(12)  | 0.6(11)  |
| C2   | 30.0(16)  | 17.0(15) | 19.5(15) | 2.4(12)  | 8.4(13)  | -2.7(12) |
| C3   | 36.6(18)  | 18.6(16) | 17.1(15) | 4.8(12)  | 2.7(13)  | -0.7(13) |
| C4   | 30.2(17)  | 20.9(16) | 19.0(15) | 1.6(12)  | -2.9(13) | 1.9(13)  |
| C5   | 29.2(16)  | 10.6(14) | 15.0(14) | -3.4(11) | 0.2(12)  | 4.0(11)  |
| C6   | 49(2)     | 10.8(15) | 16.4(15) | 0.2(11)  | 1.6(14)  | 1.1(13)  |
| C7   | 66(3)     | 12.0(16) | 18.0(16) | 1.9(12)  | 7.1(16)  | -1.3(15) |
| C8   | 59(2)     | 13.2(16) | 27.9(18) | 2.4(13)  | 20.5(17) | -0.9(15) |
| C9   | 41(2)     | 17.3(16) | 30.3(18) | 4.6(13)  | 15.8(15) | 0.5(13)  |
| C10  | 32.8(17)  | 12.5(15) | 21.3(16) | 1.1(12)  | 7.0(13)  | -0.1(12) |
| C11  | 26.0(15)  | 13.2(14) | 15.4(14) | -1.1(11) | -0.5(12) | 1.5(11)  |
| C12  | 22.8(15)  | 14.5(15) | 20.1(15) | 3.7(11)  | 1.2(12)  | -5.2(11) |

|     |          |          |          |          |           |           |
|-----|----------|----------|----------|----------|-----------|-----------|
| C13 | 22.4(15) | 14.2(14) | 15.5(14) | 0.7(11)  | 0.5(11)   | 0.8(11)   |
| C14 | 22.9(15) | 16.8(15) | 17.0(14) | -1.1(11) | -1.4(12)  | 0.9(11)   |
| C15 | 23.1(15) | 14.6(15) | 22.8(15) | 4.1(12)  | 4.7(12)   | -0.3(11)  |
| C16 | 28.5(16) | 15.5(15) | 20.4(15) | 3.8(12)  | -1.6(12)  | 1.1(12)   |
| C17 | 22.9(15) | 14.3(15) | 19.5(15) | -0.7(11) | -1.4(12)  | 0.9(11)   |
| C18 | 23.4(15) | 17.3(15) | 20.0(15) | 0.1(12)  | 3.5(12)   | 2.4(12)   |
| C19 | 27.5(16) | 17.6(15) | 16.5(14) | 4.0(11)  | 3.4(12)   | 3.9(12)   |
| C20 | 28.3(16) | 18.4(16) | 12.2(14) | -1.6(11) | -1.2(12)  | 4.3(12)   |
| C21 | 27.4(17) | 28.0(18) | 29.6(18) | 1.7(14)  | -3.4(14)  | 1.7(14)   |
| Zn2 | 22.5(2)  | 14.8(2)  | 15.7(2)  | 4.31(16) | -1.55(16) | -1.09(16) |
| Cl3 | 93.0(8)  | 22.8(5)  | 42.0(5)  | 15.8(4)  | -40.5(5)  | -22.6(5)  |
| Cl4 | 30.3(4)  | 31.9(4)  | 19.8(4)  | 10.4(3)  | 6.3(3)    | 11.9(3)   |
| O2  | 27.3(11) | 22.0(12) | 28.1(12) | 12.9(9)  | -4.6(9)   | -2.8(9)   |
| N7  | 23.4(13) | 14.0(12) | 14.9(12) | 2.2(9)   | -1.0(10)  | 0.8(9)    |
| N8  | 32.2(14) | 11.0(12) | 18.5(13) | 2.8(10)  | -1.4(11)  | 1.8(10)   |
| N9  | 18.8(12) | 13.8(12) | 16.3(12) | 1.2(9)   | -0.6(9)   | -0.1(9)   |
| N10 | 21.7(13) | 18.1(13) | 26.6(14) | 7.2(11)  | 2.6(11)   | 0.8(10)   |
| N11 | 20.0(13) | 28.5(15) | 24.7(14) | 10.7(11) | -0.7(11)  | -0.3(11)  |
| N12 | 42.9(17) | 20.9(14) | 19.7(14) | 8.0(11)  | 4.2(12)   | -0.5(12)  |
| C22 | 23.7(15) | 17.1(15) | 16.6(14) | 1.1(11)  | -3.1(12)  | 0.3(11)   |
| C23 | 26.4(16) | 18.1(15) | 21.1(15) | 2.7(12)  | -2.4(12)  | 1.7(12)   |
| C24 | 32.3(17) | 22.1(16) | 20.5(16) | 7.9(12)  | -3.0(13)  | 0.1(13)   |
| C25 | 27.6(16) | 22.2(16) | 19.8(15) | 6.3(12)  | 2.3(12)   | 0.0(12)   |
| C26 | 25.1(15) | 14.9(15) | 14.5(14) | -0.3(11) | -0.4(11)  | 1.2(11)   |
| C27 | 45(2)    | 8.5(14)  | 18.3(15) | 1.1(11)  | 0.9(14)   | 1.5(12)   |
| C28 | 61(2)    | 10.9(15) | 18.3(16) | 3.0(12)  | -6.5(15)  | -1.4(14)  |
| C29 | 51(2)    | 13.6(16) | 27.9(18) | 2.4(13)  | -16.2(16) | 2.5(14)   |
| C30 | 36.1(18) | 16.9(16) | 28.1(17) | 2.0(13)  | -11.3(14) | 2.1(13)   |
| C31 | 29.8(16) | 9.4(14)  | 20.4(15) | -0.3(11) | -5.3(12)  | 0.6(11)   |
| C32 | 23.3(15) | 23.2(16) | 16.2(15) | 3.9(12)  | -0.1(12)  | 2.8(12)   |
| C33 | 22.9(15) | 16.0(15) | 19.9(15) | 1.4(11)  | -0.7(12)  | 4.6(11)   |
| C34 | 21.3(15) | 15.3(15) | 17.1(14) | 0.8(11)  | -0.5(11)  | 0.4(11)   |
| C35 | 22.1(15) | 13.6(14) | 16.8(14) | -0.9(11) | 0.8(11)   | 2.6(11)   |
| C36 | 22.3(15) | 16.8(15) | 21.1(15) | 1.6(12)  | -2.2(12)  | 2.8(11)   |
| C37 | 27.7(16) | 16.6(15) | 18.5(15) | 3.3(12)  | -0.4(12)  | 2.0(12)   |
| C38 | 22.9(15) | 14.2(15) | 16.3(14) | -0.1(11) | -0.2(11)  | 1.7(11)   |
| C39 | 23.4(15) | 19.4(15) | 15.5(14) | 1.4(11)  | -0.4(12)  | 2.4(12)   |
| C40 | 25.5(15) | 17.8(15) | 15.0(14) | 3.4(11)  | -0.6(12)  | -2.1(12)  |
| C41 | 25.7(16) | 16.2(15) | 15.0(14) | -0.3(11) | -0.6(11)  | 0.9(12)   |
| C42 | 23.8(16) | 23.5(17) | 31.3(18) | 5.5(13)  | 2.1(13)   | 0.9(13)   |
| O3  | 29.7(12) | 25.8(13) | 35.8(14) | 8.2(10)  | 0.7(10)   | 1.2(10)   |
| C43 | 38(2)    | 40(2)    | 39(2)    | 4.9(17)  | 6.4(17)   | 0.1(16)   |
| O4  | 33.2(14) | 35.5(15) | 38.1(14) | 6.0(11)  | -9.0(11)  | 11.1(11)  |
| C44 | 37(2)    | 41(2)    | 37(2)    | 3.3(17)  | -6.3(16)  | 9.6(17)   |

**Table S20 Bond Lengths for ONW146v\_0m.**

| Atom | Atom | Length/Å  | Atom | Atom | Length/   |
|------|------|-----------|------|------|-----------|
| Zn1  | Cl1  | 2.2849(9) | Zn2  | Cl4  | 2.2913(8) |
| Zn1  | Cl2  | 2.2827(8) | Zn2  | N7   | 2.193(2)  |
| Zn1  | N1   | 2.193(3)  | Zn2  | N8   | 2.188(3)  |
| Zn1  | N2   | 2.199(3)  | Zn2  | N9   | 2.147(2)  |
| Zn1  | N3   | 2.139(3)  | O2   | C41  | 1.236(4)  |
| O1   | C20  | 1.233(4)  | N7   | C22  | 1.349(4)  |
| N1   | C1   | 1.349(4)  | N7   | C26  | 1.349(4)  |
| N1   | C5   | 1.354(4)  | N8   | C27  | 1.354(4)  |
| N2   | C6   | 1.340(4)  | N8   | C31  | 1.350(4)  |
| N2   | C10  | 1.360(4)  | N9   | C32  | 1.475(4)  |
| N3   | C11  | 1.473(4)  | N9   | C33  | 1.474(4)  |
| N3   | C12  | 1.476(4)  | N9   | C34  | 1.496(4)  |
| N3   | C13  | 1.504(4)  | N10  | C41  | 1.332(4)  |
| N4   | C20  | 1.334(4)  | N10  | C42  | 1.447(4)  |
| N4   | C21  | 1.449(4)  | N11  | C22  | 1.351(4)  |
| N5   | C1   | 1.345(4)  | N12  | C27  | 1.347(5)  |
| N6   | C6   | 1.360(5)  | C22  | C23  | 1.410(4)  |
| C1   | C2   | 1.412(4)  | C23  | C24  | 1.369(5)  |
| C2   | C3   | 1.373(5)  | C24  | C25  | 1.400(5)  |
| C3   | C4   | 1.403(5)  | C25  | C26  | 1.374(4)  |
| C4   | C5   | 1.370(4)  | C26  | C32  | 1.513(4)  |
| C5   | C11  | 1.517(4)  | C27  | C28  | 1.411(5)  |
| C6   | C7   | 1.410(5)  | C28  | C29  | 1.361(6)  |
| C7   | C8   | 1.365(6)  | C29  | C30  | 1.402(5)  |
| C8   | C9   | 1.399(5)  | C30  | C31  | 1.372(5)  |
| C9   | C10  | 1.363(5)  | C31  | C33  | 1.514(4)  |
| C10  | C12  | 1.512(4)  | C34  | C35  | 1.510(4)  |
| C13  | C14  | 1.509(4)  | C35  | C36  | 1.393(4)  |
| C14  | C15  | 1.395(4)  | C35  | C40  | 1.400(4)  |
| C14  | C19  | 1.394(4)  | C36  | C37  | 1.389(4)  |
| C15  | C16  | 1.389(4)  | C37  | C38  | 1.399(4)  |
| C16  | C17  | 1.391(4)  | C38  | C39  | 1.388(4)  |
| C17  | C18  | 1.395(4)  | C38  | C41  | 1.505(4)  |
| C17  | C20  | 1.503(4)  | C39  | C40  | 1.385(4)  |
| C18  | C19  | 1.386(4)  | O3   | C43  | 1.404(5)  |
| Zn2  | Cl3  | 2.2830(9) | O4   | C44  | 1.394(5)  |

**Table S21 Bond Angles for ONW146v\_0m.**

| Atom | Atom | Atom | Angle/°    | Atom | Atom | Atom | Angle/°    |
|------|------|------|------------|------|------|------|------------|
| Cl2  | Zn1  | Cl1  | 117.29(5)  | Cl3  | Zn2  | Cl4  | 116.38(4)  |
| N1   | Zn1  | Cl1  | 96.17(7)   | N7   | Zn2  | Cl3  | 96.65(7)   |
| N1   | Zn1  | Cl2  | 94.64(7)   | N7   | Zn2  | Cl4  | 95.26(7)   |
| N1   | Zn1  | N2   | 154.88(10) | N8   | Zn2  | Cl3  | 98.00(7)   |
| N2   | Zn1  | Cl1  | 98.07(7)   | N8   | Zn2  | Cl4  | 96.17(7)   |
| N2   | Zn1  | Cl2  | 97.06(7)   | N8   | Zn2  | N7   | 155.05(10) |
| N3   | Zn1  | Cl1  | 126.37(8)  | N9   | Zn2  | Cl3  | 125.98(8)  |
| N3   | Zn1  | Cl2  | 116.29(7)  | N9   | Zn2  | Cl4  | 117.64(7)  |
| N3   | Zn1  | N1   | 77.56(10)  | N9   | Zn2  | N7   | 77.68(9)   |
| N3   | Zn1  | N2   | 77.33(10)  | N9   | Zn2  | N8   | 77.36(10)  |
| C1   | N1   | Zn1  | 127.1(2)   | C22  | N7   | Zn2  | 128.1(2)   |
| C1   | N1   | C5   | 118.3(3)   | C22  | N7   | C26  | 118.1(3)   |
| C5   | N1   | Zn1  | 114.3(2)   | C26  | N7   | Zn2  | 113.6(2)   |
| C6   | N2   | Zn1  | 128.9(2)   | C27  | N8   | Zn2  | 128.3(2)   |
| C6   | N2   | C10  | 117.7(3)   | C31  | N8   | Zn2  | 113.8(2)   |
| C10  | N2   | Zn1  | 113.4(2)   | C31  | N8   | C27  | 117.8(3)   |
| C11  | N3   | Zn1  | 108.66(18) | C32  | N9   | Zn2  | 108.14(18) |
| C11  | N3   | C12  | 111.0(2)   | C32  | N9   | C34  | 112.3(2)   |
| C11  | N3   | C13  | 112.7(2)   | C33  | N9   | Zn2  | 106.72(18) |
| C12  | N3   | Zn1  | 107.64(18) | C33  | N9   | C32  | 111.5(2)   |
| C12  | N3   | C13  | 111.7(2)   | C33  | N9   | C34  | 112.4(2)   |
| C13  | N3   | Zn1  | 104.80(17) | C34  | N9   | Zn2  | 105.29(17) |
| C20  | N4   | C21  | 121.4(3)   | C41  | N10  | C42  | 121.1(3)   |
| N1   | C1   | C2   | 121.2(3)   | N7   | C22  | N11  | 118.7(3)   |
| N5   | C1   | N1   | 118.6(3)   | N7   | C22  | C23  | 121.4(3)   |
| N5   | C1   | C2   | 120.2(3)   | N11  | C22  | C23  | 119.9(3)   |
| C3   | C2   | C1   | 118.8(3)   | C24  | C23  | C22  | 118.9(3)   |
| C2   | C3   | C4   | 120.3(3)   | C23  | C24  | C25  | 120.2(3)   |
| C5   | C4   | C3   | 117.2(3)   | C26  | C25  | C24  | 117.3(3)   |
| N1   | C5   | C4   | 124.1(3)   | N7   | C26  | C25  | 124.1(3)   |
| N1   | C5   | C11  | 114.1(3)   | N7   | C26  | C32  | 115.2(3)   |
| C4   | C5   | C11  | 121.6(3)   | C25  | C26  | C32  | 120.7(3)   |
| N2   | C6   | N6   | 117.7(3)   | N8   | C27  | C28  | 121.1(3)   |
| N2   | C6   | C7   | 121.9(3)   | N12  | C27  | N8   | 118.3(3)   |
| N6   | C6   | C7   | 120.3(3)   | N12  | C27  | C28  | 120.6(3)   |
| C8   | C7   | C6   | 119.0(3)   | C29  | C28  | C27  | 119.7(3)   |
| C7   | C8   | C9   | 119.5(3)   | C28  | C29  | C30  | 119.5(3)   |
| C10  | C9   | C8   | 118.3(4)   | C31  | C30  | C29  | 117.8(3)   |
| N2   | C10  | C9   | 123.5(3)   | N8   | C31  | C30  | 124.1(3)   |
| N2   | C10  | C12  | 114.6(3)   | N8   | C31  | C33  | 114.3(3)   |
| C9   | C10  | C12  | 121.9(3)   | C30  | C31  | C33  | 121.5(3)   |
| N3   | C11  | C5   | 110.6(2)   | N9   | C32  | C26  | 110.1(2)   |
| N3   | C12  | C10  | 109.9(2)   | N9   | C33  | C31  | 109.9(2)   |

|     |     |     |          |     |     |     |          |
|-----|-----|-----|----------|-----|-----|-----|----------|
| N3  | C13 | C14 | 115.2(2) | N9  | C34 | C35 | 115.8(2) |
| C15 | C14 | C13 | 119.5(3) | C36 | C35 | C34 | 121.0(3) |
| C19 | C14 | C13 | 121.8(3) | C36 | C35 | C40 | 118.4(3) |
| C19 | C14 | C15 | 118.7(3) | C40 | C35 | C34 | 120.6(3) |
| C16 | C15 | C14 | 120.6(3) | C37 | C36 | C35 | 120.8(3) |
| C15 | C16 | C17 | 120.3(3) | C36 | C37 | C38 | 120.2(3) |
| C16 | C17 | C18 | 119.5(3) | C37 | C38 | C41 | 118.0(3) |
| C16 | C17 | C20 | 116.8(3) | C39 | C38 | C37 | 119.2(3) |
| C18 | C17 | C20 | 123.6(3) | C39 | C38 | C41 | 122.7(3) |
| C19 | C18 | C17 | 119.9(3) | C40 | C39 | C38 | 120.3(3) |
| C18 | C19 | C14 | 121.0(3) | C39 | C40 | C35 | 121.0(3) |
| O1  | C20 | N4  | 122.8(3) | O2  | C41 | N10 | 121.9(3) |
| O1  | C20 | C17 | 120.2(3) | O2  | C41 | C38 | 121.6(3) |
| N4  | C20 | C17 | 116.9(3) | N10 | C41 | C38 | 116.5(3) |

**Table S22 Hydrogen Bonds for ONW146v\_0m.**

| D   | H    | A                | d(D-H)/Å | d(H-A)/Å | d(D-A)/Å | D-H-A/° |
|-----|------|------------------|----------|----------|----------|---------|
| N5  | H5B  | O3 <sup>1</sup>  | 0.88     | 2.04     | 2.914(4) | 170.4   |
| N10 | H10  | Cl4 <sup>2</sup> | 0.88     | 2.47     | 3.278(3) | 153.4   |
| N11 | H11D | O4 <sup>3</sup>  | 0.88     | 2.08     | 2.934(4) | 162.4   |
| O3  | H3A  | O1 <sup>4</sup>  | 0.84     | 1.94     | 2.762(3) | 165.2   |
| O4  | H4B  | O2               | 0.84     | 1.95     | 2.787(3) | 171.7   |

<sup>1</sup>-1+X,+Y,+Z; <sup>2</sup>1+X,+Y,+Z; <sup>3</sup>-X,1-Y,-Z; <sup>4</sup>1-X,1-Y,1-Z

**Table S23 Torsion Angles for ONW146v\_0m.**

| A   | B  | C   | D   | Angle/°  | A   | B   | C   | D   | Angle/°  |
|-----|----|-----|-----|----------|-----|-----|-----|-----|----------|
| Zn1 | N1 | C1  | N5  | -9.0(4)  | Zn2 | N7  | C22 | N11 | -8.5(4)  |
| Zn1 | N1 | C1  | C2  | 171.8(2) | Zn2 | N7  | C22 | C23 | 171.8(2) |
| Zn1 | N1 | C5  | C4  | 172.7(2) | Zn2 | N7  | C26 | C25 | 172.9(2) |
| Zn1 | N1 | C5  | C11 | 11.2(3)  | Zn2 | N7  | C26 | C32 | 11.0(3)  |
| Zn1 | N2 | C6  | N6  | 3.8(4)   | Zn2 | N8  | C27 | N12 | 4.3(4)   |
| Zn1 | N2 | C6  | C7  | 174.8(2) | Zn2 | N8  | C27 | C28 | 175.3(2) |
| Zn1 | N2 | C10 | C9  | 173.4(2) | Zn2 | N8  | C31 | C30 | 174.6(2) |
| Zn1 | N2 | C10 | C12 | -8.9(3)  | Zn2 | N8  | C31 | C33 | -9.3(3)  |
| Zn1 | N3 | C11 | C5  | 42.0(3)  | Zn2 | N9  | C32 | C26 | 42.4(3)  |
| Zn1 | N3 | C12 | C10 | -45.3(3) | Zn2 | N9  | C33 | C31 | -46.0(3) |
| Zn1 | N3 | C13 | C14 | 179.4(2) | Zn2 | N9  | C34 | C35 | 178.5(2) |
| N1  | C1 | C2  | C3  | 0.5(4)   | N7  | C22 | C23 | C24 | 1.8(5)   |
| N1  | C5 | C11 | N3  | -35.7(3) | N7  | C26 | C32 | N9  | -36.2(3) |
| N2  | C6 | C7  | C8  | 0.8(5)   | N8  | C27 | C28 | C29 | 1.0(5)   |



|                 |          |                 |          |
|-----------------|----------|-----------------|----------|
| N2 C10C12N3     | 36.5(3)  | N8 C31 C33 N9   | 37.6(3)  |
| N3 C13C14C15    | 93.9(3)  | N9 C34 C35 C36  | 95.3(3)  |
| N3 C13C14C19    | -86.1(3) | N9 C34 C35 C40  | -84.7(3) |
| N5 C1 C2 C3     | 178.7(3) | N11 C22 C23 C24 | 177.9(3) |
| N6 C6 C7 C8     | 177.7(3) | N12 C27 C28 C29 | 178.6(3) |
| C1 N1 C5 C4     | 2.1(4)   | C22 N7 C26 C25  | 2.4(4)   |
| C1 N1 C5 C11    | 174.0(2) | C22 N7 C26 C32  | 173.6(3) |
| C1 C2 C3 C4     | 1.4(5)   | C22 C23 C24 C25 | -0.2(5)  |
| C2 C3 C4 C5     | -1.6(4)  | C23 C24 C25 C26 | -0.2(5)  |
| C3 C4 C5 N1     | -0.2(5)  | C24 C25 C26 N7  | -0.9(5)  |
| C3 C4 C5 C11    | 175.7(3) | C24 C25 C26 C32 | 174.9(3) |
| C4 C5 C11 N3    | 148.1(3) | C25 C26 C32 N9  | 147.6(3) |
| C5 N1 C1 N5     | 177.0(3) | C26 N7 C22 N11  | 176.9(3) |
| C5 N1 C1 C2     | -2.2(4)  | C26 N7 C22 C23  | -2.8(4)  |
| C6 N2 C10 C9    | -3.3(4)  | C27 N8 C31 C30  | -1.6(4)  |
| C6 N2 C10 C12   | 174.5(3) | C27 N8 C31 C33  | 174.4(2) |
| C6 C7 C8 C9     | -1.0(5)  | C27 C28 C29 C30 | -1.1(5)  |
| C7 C8 C9 C10    | -0.8(5)  | C28 C29 C30 C31 | -0.1(5)  |
| C8 C9 C10 N2    | 3.1(5)   | C29 C30 C31 N8  | 1.5(5)   |
| C8 C9 C10 C12   | 174.5(3) | C29 C30 C31 C33 | 174.3(3) |
| C9 C10 C12 N3   | 145.7(3) | C30 C31 C33 N9  | 146.2(3) |
| C10 N2 C6 N6    | 179.8(3) | C31 N8 C27 N12  | 179.9(3) |
| C10 N2 C6 C7    | 1.3(4)   | C31 N8 C27 C28  | 0.3(4)   |
| C11 N3 C12 C10  | 164.1(2) | C32 N9 C33 C31  | 163.9(2) |
| C11 N3 C13 C14  | -62.6(3) | C32 N9 C34 C35  | -64.1(3) |
| C12 N3 C11 C5   | 160.2(2) | C33 N9 C32 C26  | 159.5(2) |
| C12 N3 C13 C14  | 63.2(3)  | C33 N9 C34 C35  | 62.7(3)  |
| C13 N3 C11 C5   | -73.7(3) | C34 N9 C32 C26  | -73.3(3) |
| C13 N3 C12 C10  | 69.2(3)  | C34 N9 C33 C31  | 68.9(3)  |
| C13 C14 C15 C16 | 178.5(3) | C34 C35 C36 C37 | 179.1(3) |
| C13 C14 C19 C18 | 177.3(3) | C34 C35 C40 C39 | 177.4(3) |
| C14 C15 C16 C17 | 0.9(5)   | C35 C36 C37 C38 | 1.9(5)   |
| C15 C14 C19 C18 | -2.6(4)  | C36 C35 C40 C39 | -2.6(4)  |
| C15 C16 C17 C18 | -2.1(4)  | C36 C37 C38 C39 | -2.8(4)  |
| C15 C16 C17 C20 | 179.5(3) | C36 C37 C38 C41 | 178.5(3) |
| C16 C17 C18 C19 | 0.9(4)   | C37 C38 C39 C40 | 1.1(4)   |
| C16 C17 C20 O1  | 24.6(4)  | C37 C38 C41 O2  | 15.9(4)  |
| C16 C17 C20 N4  | 155.4(3) | C37 C38 C41 N10 | 164.0(3) |
| C17 C18 C19 C14 | 1.5(5)   | C38 C39 C40 C35 | 1.6(5)   |

|              |          |              |          |
|--------------|----------|--------------|----------|
| C18C17C20O1  | 153.7(3) | C39C38C41O2  | 162.8(3) |
| C18C17C20N4  | 26.3(4)  | C39C38C41N10 | 17.4(4)  |
| C19C14C15C16 | 1.5(4)   | C40C35C36C37 | 0.8(4)   |
| C20C17C18C19 | 179.2(3) | C41C38C39C40 | 179.7(3) |
| C21N4C20O1   | -0.9(5)  | C42N10C41O2  | 1.6(5)   |
| C21N4C20C17  | 179.1(3) | C42N10C41C38 | 178.6(3) |

**Table S24 Hydrogen Atom Coordinates ( $\text{\AA} \times 10^4$ ) and Isotropic Displacement Parameters ( $\text{\AA}^2 \times 10^3$ ) for ONW146v\_0m.**

| Atom | x        | y       | z        | U(eq) |
|------|----------|---------|----------|-------|
| H4   | 6803.12  | 5948.33 | 3431.8   | 29    |
| H5A  | -3443.65 | 7932.73 | 4311.23  | 30    |
| H5B  | -4287.61 | 7463.43 | 4861.76  | 30    |
| H6A  | -1867.4  | 8840.52 | 2285.67  | 37    |
| H6B  | -1561.61 | 9147.83 | 1481.38  | 37    |
| H2   | -3405.98 | 6673.09 | 5838.23  | 27    |
| H3   | -1551.72 | 6245.82 | 6411.98  | 29    |
| H4A  | 491.73   | 6716.08 | 5984.11  | 28    |
| H7   | 616.97   | 9318.89 | 1020.22  | 39    |
| H8   | 2781.3   | 9161.78 | 1271.47  | 41    |
| H9   | 3404.63  | 8697.05 | 2491.96  | 36    |
| H11A | 1199.04  | 8345.79 | 5180.75  | 23    |
| H11B | 1716.49  | 7357.93 | 4946.5   | 23    |
| H12A | 2769.22  | 8132.97 | 3725.1   | 23    |
| H12B | 1966.75  | 8954.79 | 4180.92  | 23    |
| H13A | 852.17   | 6912.66 | 2827.67  | 21    |
| H13B | 250.16   | 6467.67 | 3545.3   | 21    |
| H15  | 1548.37  | 5674.09 | 4318.42  | 24    |
| H16  | 3438.36  | 4956.78 | 4444.35  | 26    |
| H18  | 5134.98  | 6234.61 | 2772.34  | 25    |
| H19  | 3223.73  | 6910.02 | 2614.78  | 24    |
| H21A | 8666.03  | 5295.79 | 3416.53  | 43    |
| H21B | 7889.99  | 4393.12 | 3513.46  | 43    |
| H21C | 8219.33  | 5164.93 | 4313.66  | 43    |
| H10  | 7430.71  | 4061.97 | 1750.36  | 26    |
| H11C | -3171.88 | 2148.62 | 715.04   | 28    |
| H11D | -3946.7  | 2641.92 | 181.13   | 28    |
| H12C | -1638.78 | 1166.17 | 2698.52  | 33    |
| H12D | -1347.59 | 850.09  | 3496     | 33    |
| H23  | -2956.36 | 3461.21 | -766.33  | 26    |
| H24  | -1059.53 | 3857.83 | -1367.93 | 29    |
| H25  | 916.65   | 3376.71 | -952.95  | 28    |

|      |         |         |         |    |
|------|---------|---------|---------|----|
| H28  | 814.08  | 659.02  | 3928.08 | 36 |
| H29  | 2984.78 | 796.59  | 3660.21 | 37 |
| H30  | 3647.25 | 1270.82 | 2437.53 | 33 |
| H32A | 1380.73 | 1711.61 | -209.82 | 25 |
| H32B | 2069.51 | 2694.59 | 29.36   | 25 |
| H33A | 3051.8  | 1874.25 | 1226.92 | 24 |
| H33B | 2084.64 | 1070.22 | 773.2   | 24 |
| H34A | 1360.29 | 3111.74 | 2153.59 | 22 |
| H34B | 821.73  | 3568.24 | 1441.81 | 22 |
| H36  | 2274.97 | 4399.89 | 700.6   | 24 |
| H37  | 4287.76 | 5113.86 | 624.15  | 25 |
| H39  | 5746.84 | 3716.81 | 2224.44 | 24 |
| H40  | 3715.16 | 3061.11 | 2351.2  | 24 |
| H42A | 9051.83 | 4892.86 | 922.45  | 39 |
| H42B | 9428.84 | 4635.19 | 1783.49 | 39 |
| H42C | 8843.99 | 5581.33 | 1778.6  | 39 |
| H3A  | 4063.74 | 6693.99 | 5547.26 | 45 |
| H43A | 3362.7  | 7710.39 | 6534.57 | 59 |
| H43B | 3983.67 | 8444.19 | 6065.73 | 59 |
| H43C | 4890.35 | 7839.71 | 6481.55 | 59 |
| H4B  | 5785.42 | 6561.04 | 622.53  | 53 |
| H44A | 5253.57 | 8252.37 | 1091.14 | 59 |
| H44B | 6456.1  | 7792.89 | 1402.2  | 59 |
| H44C | 5037.23 | 7547.57 | 1680.26 | 59 |

**Table S25 Solvent masks information for ONW146v\_0m.**

| Number | X     | Y     | Z      | Volume | Electron count | Content |
|--------|-------|-------|--------|--------|----------------|---------|
| 1      | 0.500 | 0.000 | -0.949 | 296.3  |                | 67.2?   |

#### Crystal structure determination of ONW146v\_0m

**Crystal Data** for  $C_{22}H_{28}Cl_2N_6O_2Zn$  ( $M=544.77$  g/mol): triclinic, space group P-1 (no. 2),  $a = 10.4293(5)$  Å,  $b = 15.2887(7)$  Å,  $c = 16.4734(8)$  Å,  $\alpha = 101.862(2)^\circ$ ,  $\beta = 90.335(2)^\circ$ ,  $\gamma = 92.981(2)^\circ$ ,  $V = 2566.8(2)$  Å<sup>3</sup>,  $Z = 4$ ,  $T = 100.0$  K,  $\mu(\text{CuK}\alpha) = 3.493$  mm<sup>-1</sup>,  $D_{\text{calc}} = 1.410$  g/cm<sup>3</sup>, 101989 reflections measured ( $5.482^\circ \leq 2\theta \leq 133.57^\circ$ ), 9030 unique ( $R_{\text{int}} = 0.0585$ ,  $R_{\text{sigma}} = 0.0240$ ) which were used in all calculations. The final  $R_1$  was 0.0589 ( $I > 2\sigma(I)$ ) and  $wR_2$  was 0.1642 (all data).

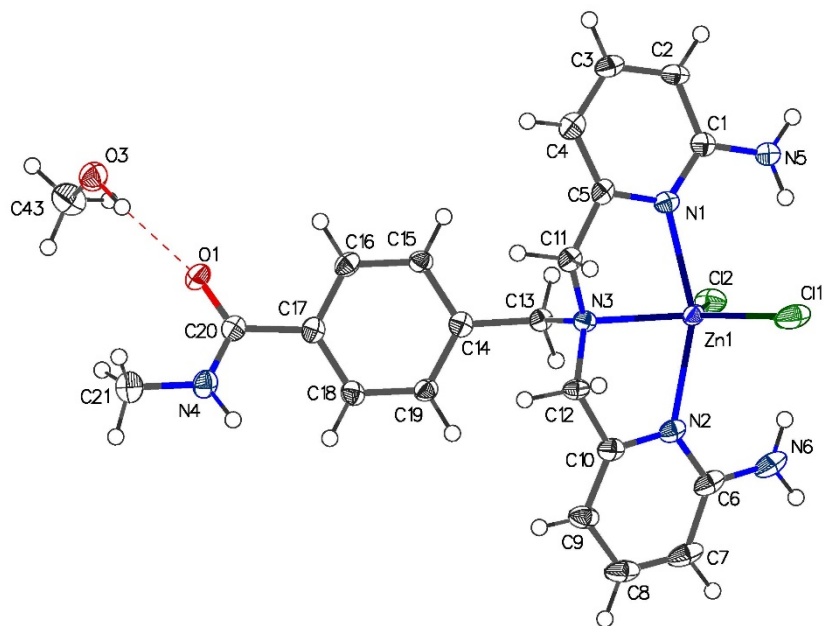

Supplement: s1 [file s1]
